# Supplementary material
Source: ML conference proceedings conference paper supplement (https://openreview.net/forum?id=C1hAtImSHo)
Supplement: supplementary_material [file attachment]

# PREDICTING GENE EXPRESSION IN SPATIALLY RESOLVED TRANSCRIPTOMICS ACROSS SAMPLES THROUGH PROBABILISTIC FUSION OF HIERARCHICAL HISTOLOGY AND SPATIAL INFORMATION

**Anonymous authors**

Paper under double-blind review

## ABSTRACT

Spatially resolved transcriptomics (SRT) is a transformative technology in biomedical research, yet its scalability is hindered by high costs and restricted capture areas. Computational methods for predicting high-quality gene expression are needed. However, existing methods are ineffective at predicting high-dimensional gene expression and generalizing to multiple spatial slices, primarily due to inter-sample heterogeneity and ineffective integration of visual and spatial information. To address these challenges, we propose STEvs, a deep generative model designed to predict gene expression from tissue histology through a probabilistic fusion of image and spatial representations. STEvs employs a multimodal variational autoencoder (VAE) architecture featuring parallel encoders that process distinct modalities: a Swin Transformer for hierarchical visual representation extraction and a multilayer perceptron (MLP) for spatial coordinates. The latent representations from these modalities are fused under uncertainty using a Product of Experts (PoE) mechanism. Furthermore, we introduce a latent alignment loss to explicitly promote a shared representation across modalities, thereby ensuring consistency between the image and spatial latent spaces. Comprehensive experimental evaluations demonstrate that STEvs not only achieves state-of-the-art performance on standard within-slice gene prediction tasks but also significantly outperforms existing methods in the more challenging cross-slice prediction scenario. Our work provides a powerful computational tool capable of predicting gene expression directly from histology images, reducing the need for costly SRT experiments.

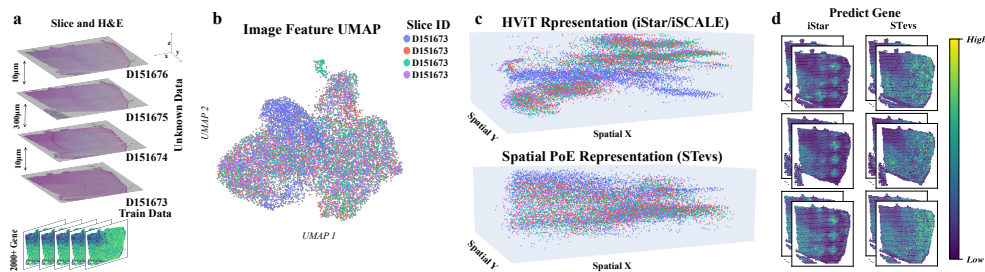

Figure 1: Workflow and representation space visualization. (a) The training and testing datasets. (b) Uniform Manifold Approximation and Projection (UMAP) McInnes et al. (2018) visualization of HViT-encoded features. (c) Spatial distribution of HViT representation across samples before and after PoE fusion. Before fusion, HViT features show clear separation between samples (upper panel). After PoE fusion, the features exhibit a more blended distribution, demonstrating improved cross-sample integration (lower panel). (d) An example of spatial gene prediction based on two different representation.

## 1 INTRODUCTION

Understanding the spatial organization of cells and gene expression patterns within tissues is essential for uncovering fundamental biological processes in fields such as developmental biology Asp et al. (2019); Cui et al. (2023), neuroscience Chen et al. (2020), and cancer research Ji et al. (2020); Moncada et al. (2020). Recent advances in spatially resolved transcriptomics (SRT) technologies — including 10X Visium Andersson et al. (2021), Slide-seq V2 Stickels et al. (2021), and Stereo-seq Wang et al. (2022), have enabled whole-transcriptome profiling while preserving spatial context Burgess (2019); Rao et al. (2021). These technologies offer unprecedented opportunities to construct detailed tissue atlases, decipher cell–cell interactions, and explore the tumor microenvironment Williams et al. (2022); Miao et al. (2024).

However, the high experimental cost and limited capture area of SRT experiments (e.g., only  $6.5 \times 6.5$  mm capture area of 10X Visium) hinder their broad application in clinical samples and large-scale cohort studies Schmauch et al. (2020); Gao et al. (2024). In contrast, hematoxylin and eosin (H&E)-stained histology images, the gold standard in pathological diagnosis, are widely available, cost-effective, and rich in cellular and tissue structural information Yu et al. (2016). Growing evidence indicates a strong correlation between tissue histology and gene expression patterns Naik et al. (2020); Wagner et al. (2023), suggesting the feasibility of predicting spatial gene expression directly from H&E images Long et al. (2023). This premise has motivated the development of numerous computational models. The technical evolution has progressed from initial convolutional neural networks (CNNs) processing individual image patches He et al. (2020); Monjo et al. (2022), to graph neural networks (GNNs) characterizing spatial contextual relationships Hu et al. (2021); Zeng et al. (2022); Gao et al. (2024), and more recently to vision transformers that capture long-range and hierarchical tissue features Pang et al. (2021); Zhang et al. (2024); Chung et al. (2024).

Despite these advances, existing methods face three major challenges: (i) Limited generalization ability: Models typically perform well on their training tissue slides but suffer significant performance degradation when applied to new slides from different individuals or batches (Fig. 1a), even in the absence of apparent image batch effects (Fig. 1b). This performance degradation stems primarily from shifts in image features that persist even at spatially adjacent locations across different tissue slides (Fig. 1c) Andersson et al. (2021); Pang et al. (2021). (ii) Poor scalability to high-dimensional gene expression: Most methods are designed for low-dimensional gene targets (typically  $< 1000$  genes) He et al. (2020); Pang et al. (2021); Chung et al. (2024); Yang et al. (2024), necessitating the exclusion of substantial gene information from the full transcriptomics data. (iii) ineffective multimodal integration: Current approaches predominantly rely on simplistic integration strategies like feature concatenation or graph message passing, which fail to capture the complex interdependencies between gene expression, cellular histology, and spatial information Anderson & Simon (2020), and consequently lacking the ability to robustly model uncertainty across heterogeneous information sources Baltrušaitis et al. (2018).

To address the aforementioned challenges, we propose STEvs (Spatial Transcriptomics gene expression prediction by integrating visual representations and spatial information), a novel deep generative framework that robustly predicts spatial gene expression by probabilistically integrating hierarchical visual histology with spatial information (Fig. 2a). Our objective is to learn an intrinsic and generalizable mapping from histology to high-dimensional gene expression that transfers effectively across tissue slides (Fig. 1d). The key contributions of this work are as follows: First, we designed a VAE framework Kingma & Welling (2013); Suzuki et al. (2016) that utilizes parallel encoders to learn the hierarchical visual features of tissue images and the contextual information of spatial coordinates, respectively. The model incorporates a negative binomial (NB)-based decoder Lopez et al. (2018) to directly characterize discrete and over-dispersed SRT count data, enabling accurate prediction of high-dimensional gene expression. Second, we incorporated a Product of Experts (PoE) mechanism Hinton (2002) to probabilistically fuse the latent distributions from the visual and spatial modalities, thereby obtaining a more robust joint representation that accounts for uncertainty (Fig. 1c). Finally, we proposed a latent space alignment loss Ji et al. (2020); Wagner et al. (2023) that enhances unified representation learning by explicitly constraining cross-modal latent spaces, ensuring consistency and mutual information exchange between modalities. Extensive experiments on 16 datasets across 5 groups demonstrate that STEvs achieves state-of-the-art performance on standard intra-slice prediction tasks and significantly outperforms existing advanced methods in the more challenging cross-slice prediction task (Fig. 2c). Our work pro-

vides a reliable and generalizable solution for generating high-quality virtual spatial transcriptomics data, paving a promising path for advancing large-scale molecular analysis and precision medicine based on routine pathological images. The code for this project is publicly available on GitHub at <https://github.com/iclr2026stevs/stevs.v1.0>.

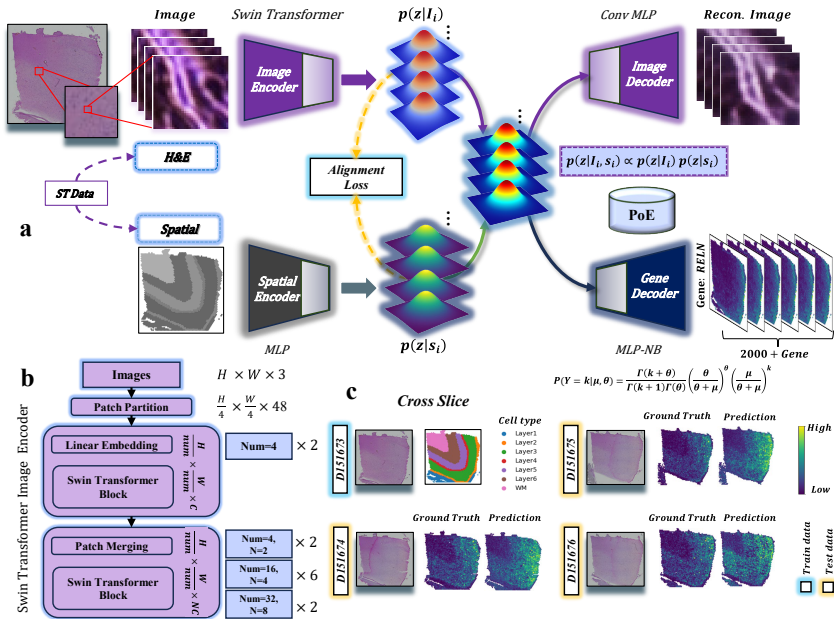

Figure 2: The STEvs model architecture. (a) The overall framework of STEvs. (b) The Swin Transformer architecture. (c) An example of the cross-slice prediction task.

## 2 RELATED WORK

Predicting spatially resolved transcriptomics (SRT) from histology images has become a significant area of research in computational pathology Long et al. (2023). Early pioneering works primarily employed CNNs, such as ST-Net He et al. (2020) and DeepSpaCE Monjo et al. (2022), to predict gene expression from individual image patches. While these methods successfully demonstrated the feasibility of the task, their patch-based, independent processing inherently ignored the crucial spatial context within the tissue Stahl et al. (2016). To overcome this, subsequent research introduced GNNs to explicitly model the relationships between spots. Methods like SpaGCN Hu et al. (2021) and Hist2ST Zeng et al. (2022) construct spatial proximity graphs to aggregate neighborhood information. However, GNN-based approaches can be limited by their reliance on complex graph construction strategies and their difficulty in capturing long-range dependencies across the entire slide.

More recently, the field has shifted towards Vision Transformers (ViTs) and their variants, aimed at learning more powerful, long-range features directly from images Han et al. (2022). Initial applications like HisToGene Pang et al. (2021) utilized a standard ViT architecture, while more advanced models such as iStar Zhang et al. (2024) and iSCALE Schroeder et al. (2025) leverage hierarchical vision transformers (HVITs) to capture multi-scale visual features. Additionally, other learning paradigms have been explored, including generative models like STAGELi et al. (2024) and contrastive learning frameworks like BLEEPXie et al. (2023). Despite these significant advancements, most existing methods still struggle with two critical challenges: one is achieving robust generalization across unseen tissue slices from different batches or patients (Fig. 1d); the other is effectively fusing multimodal information (e.g., visual and spatial data) while properly accounting for the inherent uncertainty (Fig. 2a).

**Our Contributions**, STEvs builds upon the aforementioned research and introduces innovations in several key aspects. First, unlike most discriminative models, we adopt a generative framework based on a multimodal VAE, which probabilistically fuses the two modalities of visual histology and spatial coordinates using a PoE, rather than simple feature concatenation Long et al. (2023), allowing the uncertainty weights of the two modalities to be implicitly determined by the data. Second, we leverage the powerful Swin Transformer to deeply mine the complex intra-spot visual context, thereby replacing the dependency on GNNs Gao et al. (2024); Zeng et al. (2022); Yang et al. (2024) and manual hierarchical partitioning schemes Chung et al. (2024); Wang et al. (2025). Finally, we are the first to introduce a latent space alignment loss, which explicitly encourages the model to learn a slide-invariant universal representation, enabling superior generalization ability on the highly challenging cross-slice prediction tasks.

### 3 METHODS

Unlike methods that rely on single information sources, simple feature concatenation Gao et al. (2024); He et al. (2020) or cross-attention mechanisms Xu et al. (2023), STEvs accounts for the uncertainty of heterogeneous representations during modality fusion. The workflow uses a Multi-Modal Variational Autoencoder (MM-VAE) Suzuki et al. (2016); He et al. (2024) architecture with three core components (Fig. 2a): parallel encoders (**Swin Transformer** Liu et al. (2021) and **MLP** LeCun et al. (2015)), a **PoE** Hinton (2002) fusion mechanism, and multi-task decoders for image reconstruction and gene expression prediction using a **Negative Binomial (NB) distribution** Lopez et al. (2018). The detailed proof of our method’s formulas is provided in Appendix A, the detailed architecture of the STEvs model is described in Appendix B, and the step-by-step procedure for our method can be found in Appendix C.

#### 3.1 PARALLEL MODALITY ENCODERS

To efficiently process the distinct data modalities, STEvs employs two parallel encoders. **Image histology Encoder:** We choose a Swin Transformer as the image encoder, with its architecture detailed in Fig. 2b). The Swin Transformer was selected not only for its ability to capture long-range dependencies, characteristic of Transformer architectures, but also because its hierarchical design effectively extracts multi-scale visual features, which is crucial for identifying complex histopathological patterns. Compared to a standard ViT, its shifted window attention mechanism is more computationally efficient. Compared to CNNs, it better models global context, rather than being confined to limited receptive fields. We employ an ImageNet pre-trained Stickels et al. (2021) Swin Transformer Ji et al. (2020) that processes an input tensor of histology image patches ( $I_i$ ) and outputs the parameters for the image latent distribution: a mean vector  $\mu_{\text{img}}$  and a log variance vector  $\log \sigma_{\text{img}}^2$ . **Spatial Context Encoder:** For spatial coordinates, we utilize a concise MLP. While more complex spatial encoding schemes exist (e.g., using Fourier features Tancik et al. (2020)), we found that a simple MLP is sufficient to capture the absolute positional context Andersson et al. (2021) ( $s_i = (x_i, y_i)$ ) for this task, while effectively avoiding overfitting to specific spatial patterns, thereby enhancing the model’s generalization ability across different tissue slides. It similarly outputs parameters for the spatial latent distribution:  $\mu_{\text{spatial}}$  and  $\log \sigma_{\text{spatial}}^2$ .

#### 3.2 PROBABILISTIC FUSION AND LATENT SPACE ALIGNMENT

The latent distributions from the encoders are integrated through two key synergistic mechanisms. First, to fuse information from different modalities Gao et al. (2024), we moved beyond simple feature concatenation or cross-attention mechanisms Xu et al. (2023), as they cannot directly model the contributions and uncertainties of different information sources. Instead, we innovatively employ the PoE framework. The advantage of PoE lies in its ability to fuse the latent distributions of the image  $\mathcal{N}(\mu_{\text{img}}, \sigma_{\text{img}}^2)$  and spatial  $\mathcal{N}(\mu_{\text{spatial}}, \sigma_{\text{spatial}}^2)$  modalities at a probabilistic level Stickels et al. (2021). When both image and spatial information are clear, the fused posterior distribution becomes sharper (i.e., has smaller variance and higher certainty). Conversely, when one modality is ambiguous or noisy (e.g., a histological ly featureless tissue region), PoE automatically down-weights its contribution to that prediction, yielding a more robust joint representation. This process yields a more precise joint posterior distribution  $\mathcal{N}(\mu_{\text{fused}}, \sigma_{\text{fused}}^2)$ , whose parameters are calculated analytically:

$$\sigma_{\text{fused}}^2 = \left( \frac{1}{\sigma_{\text{img}}^2} + \frac{1}{\sigma_{\text{spatial}}^2} \right)^{-1}, \quad \mu_{\text{fused}} = \left( \frac{\mu_{\text{img}}}{\sigma_{\text{img}}^2} + \frac{\mu_{\text{spatial}}}{\sigma_{\text{spatial}}^2} \right) \sigma_{\text{fused}}^2 \quad (1)$$

Concurrently, while PoE ensures effective fusion for an *individual data point*, learning a *slide-invariant* universal representation to address the domain shift problem in cross-slice prediction requires a global strategy. Inspired by prior work in multimodal representation learning Ji et al. (2020); Wagner et al. (2023), we introduce a **Latent Space Alignment Loss** ( $\mathcal{L}_{\text{align}}$ ). This loss enhances the model’s ability to learn universal representations by explicitly minimizing the Mean Squared Error (MSE) Kingma & Welling (2013) between the mean vectors of the two modalities. This forces the image and spatial encoders to learn a *semantically consistent shared latent space*, ensuring that similar spatial locations and cell types are mapped to nearby regions in the latent space regardless of histological variations. This is key to achieving strong generalization.

$$\mathcal{L}_{\text{align}} = \frac{1}{N} \sum_{i=1}^N \left\| z_{\text{img}}^{(i)} - z_{\text{spatial}}^{(i)} \right\|_2^2 \quad (2)$$

where  $N$  is the spot number and  $i$  is the index.

### 3.3 MULTI-TASK DECODERS AND TRAINING OBJECTIVE

From the fused posterior, a latent vector  $z$  is sampled using the reparameterization trick Kingma & Welling (2013) and fed into our two decoders, which are designed as a multi-task learning framework. The overall model is trained by minimizing a composite loss function:

$$L_{\text{total}} = \lambda_{\text{img}} L_{\text{img}} + \lambda_{\text{rna}} L_{\text{rna}} + \beta L_{\text{KLD}} + \gamma L_{\text{align}} \quad (3)$$

The **Image Reconstruction Decoder** (composed of transposed convolutions) reconstructs the input image patch  $\hat{I}_i$ . This is a deliberate design choice: the image reconstruction task acts as a powerful regularizer, forcing the image encoder to learn information-rich visual features capable of preserving fine-grained tissue structures, rather than only abstract features sufficient for gene prediction. This enriched representation, in turn, improves the accuracy of the primary gene prediction task. Its loss,  $L_{\text{img}}$ , is the MSE between the original and reconstructed images Kingma & Welling (2013). The **Gene Expression Decoder** (an MLP) predicts the gene expression parameters. Considering the count-based nature and prevalent over-dispersion of spatial transcriptomics data Naik et al. (2020), we chose a NB distribution Lopez et al. (2018) to model the gene expression, which more accurately captures these statistical properties compared to MSE or a Poisson distribution, leading to more reliable predictions. Its loss,  $L_{\text{rna}}$ , is the Negative Log-Likelihood of the NB distribution.  $L_{\text{KLD}}$  is the standard Kullback-Leibler (KL) divergence loss that regularizes the fused latent space to approximate a standard normal distribution Kingma & Welling (2013). We employ a KL annealing strategy Bowman et al. (2016) on its weight  $\beta$  to prevent posterior collapse. The impact of the weights for each loss component on the model’s performance is discussed in the Appendix I. In our experiments, we used default values of  $\lambda_{\text{img}} = 1.0$ ,  $\lambda_{\text{rna}} = 10.0$ ,  $\beta = 0.5$ , and  $\gamma = 0.5$ .

## 4 EXPERIMENTS

### 4.1 DATASETS

We evaluated our model on a total of 16 tissue sections from the public human dorsolateral prefrontal cortex (DLPFC) Maynard et al. (2021) and 10x Visium mouse brain Ståhl et al. (2016) datasets. For model training, we filtered for spatially variable genes (SVGs) using `scanpy` Wolf et al. (2018) and `squidpy` Palla et al. (2022), resulting in over 2,000 genes per group (Appendix E), and extracted corresponding image patches. To further assess generalization, we also used Human Breast Cancer (HBC) Wu et al. (2021) and Human Squamous Cell Carcinoma (HSC) Ji et al. (2020) datasets. Additionally, a MISAR-seq Jiang et al. (2023) dataset from different individuals at different time points was also used (Appendix J). All detailed data processing methods, patch extraction rules, and gene filtering criteria are provided in the Appendix D.

## 4.2 EXPERIMENTAL SETUP

We evaluated model performance under two settings: intra-slice and a more challenging cross-slice prediction. Intra-slice evaluation involved random data splitting within each slice, while cross-slice evaluation used a single-slice training scheme for cross-validation within each group (Fig. 2c). We quantified prediction accuracy using MSEKingma & Welling (2013), Pearson Correlation Coefficient (PCC)Pearson (1896), and Spearman’s Rank Correlation Coefficient (SCC)Spearman (1987). We ran all experiments for 100 epochs with a learning rate of 1e-4 on four A100 (80GB) GPUs. All detailed training hyperparameters information are provided in the Appendix K.

Table 1: Intra-slice cross-validation performance of models across DLPFC and 10x Mouse Brain dataset groups. Metrics: MSE, PCC, SCC. Bold values indicate column-wise optimal performance (min MSE, max PCC/SCC). Standard deviations are omitted for space; full data in Appendix E. ”Promotion” denotes the relative percentage improvement over the best-performing baseline model.

| Model Category                         | DLPFC Dataset |              |              |              |              |              |              |              |              | 10x Mouse Brain Dataset |              |              |                    |              |              |  |
|----------------------------------------|---------------|--------------|--------------|--------------|--------------|--------------|--------------|--------------|--------------|-------------------------|--------------|--------------|--------------------|--------------|--------------|--|
|                                        | Human 1       |              |              | Human 2      |              |              | Human 3      |              |              | Sagittal-Anterior       |              |              | Sagittal-Posterior |              |              |  |
|                                        | MSE ↓         | PCC ↑        | SCC ↑        | MSE ↓        | PCC ↑        | SCC ↑        | MSE ↓        | PCC ↑        | SCC ↑        | MSE ↓                   | PCC ↑        | SCC ↑        | MSE ↓              | PCC ↑        | SCC ↑        |  |
| <b>Local Image-based</b>               |               |              |              |              |              |              |              |              |              |                         |              |              |                    |              |              |  |
| ST-Net (Nat. B.E. He et al. (2020))    | 1.494         | 0.033        | 0.070        | 1.348        | 0.053        | 0.086        | 0.365        | 0.123        | 0.134        | 0.896                   | 0.051        | 0.066        | 0.915              | 0.043        | 0.121        |  |
| BLEEP (NeurIPS Xie et al. (2023))      | 1.551         | 0.036        | 0.037        | 1.365        | 0.058        | 0.057        | 1.067        | 0.086        | 0.077        | 0.772                   | 0.086        | 0.087        | 0.967              | 0.123        | 0.117        |  |
| <b>Graph-based Context</b>             |               |              |              |              |              |              |              |              |              |                         |              |              |                    |              |              |  |
| EGN (PR Yang et al. (2024))            | 0.995         | 0.051        | 0.054        | 1.008        | 0.053        | 0.066        | 0.997        | 0.103        | 0.109        | 0.739                   | 0.084        | 0.076        | 1.087              | 0.099        | 0.107        |  |
| IGI-DL (Cell R.M. Gao et al. (2024))   | 0.205         | 0.115        | 0.117        | 0.297        | 0.155        | 0.152        | 0.284        | 0.138        | 0.124        | 0.324                   | 0.239        | 0.242        | 0.584              | 0.292        | 0.264        |  |
| <b>Transformer-based Context</b>       |               |              |              |              |              |              |              |              |              |                         |              |              |                    |              |              |  |
| iStar (Nat. Biot. Zhang et al. (2024)) | 0.149         | 0.191        | 0.188        | 0.194        | 0.204        | 0.229        | 0.171        | 0.236        | 0.230        | 0.254                   | 0.384        | 0.375        | 0.264              | 0.459        | 0.397        |  |
| TRIPLEX (CVPR Chung et al. (2024))     | 0.181         | 0.131        | 0.125        | 0.211        | 0.194        | 0.186        | 0.179        | 0.211        | 0.199        | 0.372                   | 0.232        | 0.216        | 0.345              | 0.315        | 0.297        |  |
| MZORT (AAAI Wang et al. (2025))        | 1.000         | -0.001       | -0.000       | 1.006        | -0.001       | -0.000       | 1.019        | -0.000       | -0.000       | 1.008                   | 0.001        | 0.001        | 1.020              | 0.001        | 0.001        |  |
| <b>Coordinate-based Generative</b>     |               |              |              |              |              |              |              |              |              |                         |              |              |                    |              |              |  |
| STAGE (NAR Li et al. (2024))           | 0.259         | 0.108        | 0.105        | 0.307        | 0.139        | 0.130        | 0.339        | 0.150        | 0.149        | 0.462                   | 0.104        | 0.094        | 0.502              | 0.120        | 0.123        |  |
| <b>STeVs (Ours)</b>                    | <b>0.142</b>  | <b>0.215</b> | <b>0.202</b> | <b>0.188</b> | <b>0.281</b> | <b>0.271</b> | <b>0.166</b> | <b>0.296</b> | <b>0.263</b> | <b>0.239</b>            | <b>0.413</b> | <b>0.396</b> | <b>0.208</b>       | <b>0.486</b> | <b>0.423</b> |  |
| <b>Promotion</b>                       | <b>4.7%</b>   | <b>12.6%</b> | <b>7.4%</b>  | <b>3.1%</b>  | <b>37.7%</b> | <b>18.3%</b> | <b>2.9%</b>  | <b>25.4%</b> | <b>14.3%</b> | <b>5.9%</b>             | <b>7.6%</b>  | <b>5.6%</b>  | <b>21.2%</b>       | <b>5.9%</b>  | <b>6.5%</b>  |  |

## 4.3 MAIN PERFORMANCE

In the intra-slice cross-validation setting, as shown in Table 1, STeVs demonstrates highly competitive performance, achieving the lowest MSE and the highest PCC and SCC across all five dataset groups. This indicates that STeVs is a top-performing model in standard single-sample learning tasks. However, intra-slice testing cannot effectively evaluate a model’s generalization ability when faced with unseen slices from new patients, batches, or different experimental conditions. For instance, iStar, one of the strongest baselines in the intra-slice setting, exhibits a steep performance decline when transitioning to the cross-slice task. Its PCC drops from 0.204 to 0.105, and its SCC drops from 0.224 to 0.109 (data from Table 1 and Table 2, respectively), a performance decay of nearly 50%. In stark contrast, STeVs displays excellent and robust performance in the demanding cross-slice setting. As shown in Table 2, STeVs significantly surpasses all baseline models across all metrics on all datasets. Its superiority is particularly prominent on the Human 3 dataset, where STeVs achieves improvements of 109.8% in PCC and 95.8% in SCC over the next-best model. These results provide strong evidence that STeVs successfully learns a transferable, slice-invariant histology-to-gene mapping, equipping it with the generalization capability required for real-world applications. Further details on this section are provided in Appendix E. We also demonstrated the superiority of our model in extended experiments on the HBC and HSC datasets, with further details available in Appendix J.

## 4.4 ABLATION STUDIES

We conducted comprehensive ablation studies to validate our key design choices, with results summarized in Table 3 (intra-slice) and Table 4 (cross-slice). The results underscore the necessity of each core component: removing the spatial encoder (STeVs w/o Spatial Encoder) or the latent space alignment loss (STeVs w/o Alignment Loss) critically impairs cross-slice generalization, while image reconstruction (STeVs w/o Image Decoder) acts as an effective regularizer. Our proposed PoE fusion mechanism demonstrated superior performance over common alternatives including feature concatenation Baltrušaitis et al. (2018), deterministic fusion, and cross-attention Xu et al. (2023). Architectural evaluations confirmed the Swin Transformer’s superiority over ViT Han et al. (2022) and CNN Krizhevsky et al. (2012) backbones, and the robustness of our simple MLP spatial encoder compared to more complex Gaussian Process (GP) Williams & Rasmussen

Table 2: Comparison of cross-slice cross-validation model performance across dataset groups of DLPFC and 10x Mouse Brain. Metrics: MSE, PCC, SCC. Full data available in the Appendix E.

| Model Category                         | DLPFC Dataset |              |              |              |              |              |              |               |              | 10x Mouse Brain Dataset |              |              |                    |              |              |
|----------------------------------------|---------------|--------------|--------------|--------------|--------------|--------------|--------------|---------------|--------------|-------------------------|--------------|--------------|--------------------|--------------|--------------|
|                                        | Human 1       |              |              | Human 2      |              |              | Human 3      |               |              | Sagittal-Anterior       |              |              | Sagittal-Posterior |              |              |
|                                        | MSE ↓         | PCC ↑        | SCC ↑        | MSE ↓        | PCC ↑        | SCC ↑        | MSE ↓        | PCC ↑         | SCC ↑        | MSE ↓                   | PCC ↑        | SCC ↑        | MSE ↓              | PCC ↑        | SCC ↑        |
| <b>Local Image-based</b>               |               |              |              |              |              |              |              |               |              |                         |              |              |                    |              |              |
| ST-Net (Nat. B.E. He et al. (2020))    | 1.471         | 0.009        | 0.062        | 1.571        | 0.008        | 0.063        | 1.283        | 0.040         | 0.043        | 1.861                   | 0.010        | 0.052        | 1.502              | 0.071        | 0.131        |
| BLEEP (NeurIPS Xie et al. (2023))      | 1.758         | 0.029        | 0.030        | 1.274        | 0.039        | 0.036        | 1.574        | 0.039         | 0.034        | 1.436                   | 0.069        | 0.067        | 1.229              | 0.118        | 0.111        |
| <b>Graph-based Context</b>             |               |              |              |              |              |              |              |               |              |                         |              |              |                    |              |              |
| EGN (PR Yang et al. (2024))            | 0.905         | 0.049        | 0.056        | 0.896        | 0.052        | 0.045        | 0.937        | 0.052         | 0.052        | 1.159                   | 0.084        | 0.075        | 0.825              | 0.117        | 0.130        |
| IGI-DL (Cell R.M. Gao et al. (2024))   | 0.717         | 0.059        | 0.059        | 1.859        | 0.029        | 0.030        | 1.908        | 0.008         | 0.001        | 0.918                   | 0.089        | 0.087        | 0.924              | 0.118        | 0.126        |
| <b>Transformer-based Context</b>       |               |              |              |              |              |              |              |               |              |                         |              |              |                    |              |              |
| iStar (Nat. Biot. Zhang et al. (2024)) | <u>0.262</u>  | <u>0.126</u> | <u>0.136</u> | <u>0.215</u> | <u>0.105</u> | <u>0.109</u> | <u>0.319</u> | <u>0.122</u>  | <u>0.118</u> | <u>0.273</u>            | <u>0.301</u> | <u>0.300</u> | <u>0.269</u>       | <u>0.363</u> | <u>0.325</u> |
| TRIPLEX (CVPR Chung et al. (2024))     | 0.487         | 0.097        | 0.092        | 0.566        | 0.083        | 0.083        | 0.814        | 0.071         | 0.069        | 0.438                   | 0.197        | 0.180        | 0.450              | 0.256        | 0.247        |
| M2ORT (AAAI Wang et al. (2025))        | 1.205         | 0.005        | 0.005        | 1.188        | -0.004       | -0.002       | 1.106        | -0.001        | 0.001        | 1.133                   | 0.006        | 0.007        | 1.253              | 0.001        | 0.001        |
| <b>Coordinate-based Generative</b>     |               |              |              |              |              |              |              |               |              |                         |              |              |                    |              |              |
| STAGE (NAR Li et al. (2024))           | 1.186         | 0.044        | 0.042        | 0.921        | 0.046        | 0.047        | 0.615        | 0.074         | 0.077        | 0.624                   | 0.125        | 0.118        | 0.631              | 0.156        | 0.158        |
| <b>STeVs (Ours)</b>                    | <b>0.145</b>  | <b>0.153</b> | <b>0.152</b> | <b>0.202</b> | <b>0.167</b> | <b>0.166</b> | <b>0.174</b> | <b>0.256</b>  | <b>0.231</b> | <b>0.261</b>            | <b>0.362</b> | <b>0.350</b> | <b>0.223</b>       | <b>0.442</b> | <b>0.392</b> |
| <b>Promotion</b>                       | <b>44.7%</b>  | <b>21.4%</b> | <b>11.8%</b> | <b>6.0%</b>  | <b>59.0%</b> | <b>52.3%</b> | <b>45.5%</b> | <b>109.8%</b> | <b>95.8%</b> | <b>4.4%</b>             | <b>20.3%</b> | <b>16.7%</b> | <b>17.1%</b>       | <b>21.8%</b> | <b>20.6%</b> |

(2006) or Fourier Feature-based Mildenhall et al. (2021) encoders. Finally, leveraging pre-trained weights (STeVs w/o Pretrained) consistently improved performance. These findings collectively validate the design of STeVs.

To systematically validate the necessity of each core component within the STeVs model and to demonstrate the superiority of our design choices, we conducted a series of comprehensive ablation studies. We evaluated the impact on performance by removing or replacing the model’s key modules, with the results summarized in Table 3 (intra-slice) and Table 4 (cross-slice). Further details can be found in Appendix F.

Table 3: Intra-slice cross-validation Performance Comparison of STeVs Variants on DLPFC (Human) and 10x Mouse Brain (Sagittal) Datasets

| Model Variant                    | Human 1      |              |              | Human 2      |              |              | Human 3      |              |              | Sagittal-Anterior |              |              | Sagittal-Posterior |              |              |
|----------------------------------|--------------|--------------|--------------|--------------|--------------|--------------|--------------|--------------|--------------|-------------------|--------------|--------------|--------------------|--------------|--------------|
|                                  | MSE ↓        | PCC ↑        | SCC ↑        | MSE ↓        | PCC ↑        | SCC ↑        | MSE ↓        | PCC ↑        | SCC ↑        | MSE ↓             | PCC ↑        | SCC ↑        | MSE ↓              | PCC ↑        | SCC ↑        |
| <i>Component Ablation</i>        |              |              |              |              |              |              |              |              |              |                   |              |              |                    |              |              |
| STeVs w/o Image Decoder          | 0.145        | 0.211        | 0.199        | 0.190        | 0.278        | 0.268        | 0.169        | 0.291        | 0.259        | 0.242             | 0.409        | 0.392        | 0.210              | 0.481        | 0.419        |
| STeVs w/o Spatial Encoder        | 0.171        | 0.172        | 0.162        | 0.226        | 0.225        | 0.217        | 0.199        | 0.237        | 0.210        | 0.287             | 0.330        | 0.317        | 0.250              | 0.389        | 0.338        |
| STeVs w/o Alignment Loss         | 0.147        | 0.209        | 0.200        | 0.188        | 0.280        | 0.266        | 0.172        | 0.289        | 0.261        | 0.241             | 0.411        | 0.390        | 0.213              | 0.479        | 0.421        |
| <i>Fusion Mechanism Ablation</i> |              |              |              |              |              |              |              |              |              |                   |              |              |                    |              |              |
| STeVs (Concat)                   | 0.146        | 0.209        | 0.197        | 0.191        | 0.276        | 0.265        | 0.170        | 0.288        | 0.257        | 0.244             | 0.407        | 0.388        | 0.212              | 0.478        | 0.415        |
| STeVs (Deterministic)            | <b>0.141</b> | 0.212        | 0.200        | 0.193        | 0.272        | 0.261        | 0.173        | 0.285        | 0.253        | 0.247             | 0.401        | 0.384        | 0.214              | 0.472        | 0.410        |
| STeVs (Cross-Attention)          | 0.143        | 0.213        | 0.201        | <b>0.187</b> | <b>0.283</b> | <b>0.273</b> | 0.167        | 0.294        | 0.261        | 0.240             | 0.411        | 0.394        | <b>0.206</b>       | 0.488        | <b>0.425</b> |
| <i>Spatial Encoder Variants</i>  |              |              |              |              |              |              |              |              |              |                   |              |              |                    |              |              |
| STeVs (Gaussian Process)         | 0.144        | 0.212        | 0.200        | 0.189        | 0.279        | 0.269        | 0.168        | 0.293        | 0.260        | 0.240             | 0.410        | 0.393        | 0.209              | 0.483        | 0.420        |
| STeVs (MLP w/ Fourier)           | 0.145        | 0.210        | 0.198        | 0.191        | 0.276        | 0.265        | 0.170        | 0.290        | 0.258        | <b>0.238</b>      | <b>0.415</b> | <b>0.399</b> | 0.211              | 0.480        | 0.417        |
| <i>Architecture Variants</i>     |              |              |              |              |              |              |              |              |              |                   |              |              |                    |              |              |
| STeVs (Convolutional)            | 0.217        | 0.163        | 0.162        | 0.259        | 0.215        | 0.203        | 0.246        | 0.224        | 0.203        | 0.351             | 0.322        | 0.307        | 0.332              | 0.382        | 0.313        |
| STeVs (ViT)                      | 0.149        | 0.210        | 0.194        | 0.199        | 0.271        | 0.266        | 0.176        | 0.290        | 0.252        | 0.251             | 0.403        | 0.391        | 0.217              | 0.476        | 0.414        |
| STeVs w/o Pretrained             | 0.191        | 0.176        | 0.173        | 0.243        | 0.231        | 0.218        | 0.223        | 0.239        | 0.213        | 0.318             | 0.347        | 0.329        | 0.290              | 0.403        | 0.357        |
| <b>STeVs (Ours)</b>              | 0.142        | <b>0.215</b> | <b>0.202</b> | 0.188        | 0.281        | 0.271        | <b>0.166</b> | <b>0.296</b> | <b>0.263</b> | 0.239             | 0.413        | 0.396        | 0.208              | <b>0.489</b> | 0.423        |

Table 4: Cross-slice cross-validation Performance Comparison of STeVs Variants on DLPFC (Human) and 10x Mouse Brain (Sagittal) Datasets

| Model Variant                    | Human 1      |              |              | Human 2      |              |              | Human 3      |              |              | Sagittal-Anterior |              |              | Sagittal-Posterior |              |              |
|----------------------------------|--------------|--------------|--------------|--------------|--------------|--------------|--------------|--------------|--------------|-------------------|--------------|--------------|--------------------|--------------|--------------|
|                                  | MSE ↓        | PCC ↑        | SCC ↑        | MSE ↓        | PCC ↑        | SCC ↑        | MSE ↓        | PCC ↑        | SCC ↑        | MSE ↓             | PCC ↑        | SCC ↑        | MSE ↓              | PCC ↑        | SCC ↑        |
| <i>Component Ablation</i>        |              |              |              |              |              |              |              |              |              |                   |              |              |                    |              |              |
| STeVs w/o Image Decoder          | 0.175        | 0.131        | 0.128        | 0.234        | 0.145        | 0.142        | 0.245        | 0.132        | 0.130        | 0.298             | 0.320        | 0.305        | 0.263              | 0.401        | 0.350        |
| STeVs w/o Spatial Encoder        | 0.345        | 0.115        | 0.120        | 0.360        | 0.110        | 0.112        | 0.380        | 0.101        | 0.105        | 0.433             | 0.212        | 0.209        | 0.351              | 0.280        | 0.263        |
| STeVs w/o Alignment Loss         | 0.158        | 0.145        | 0.142        | 0.225        | 0.150        | 0.148        | 0.238        | 0.141        | 0.138        | 0.285             | 0.331        | 0.315        | 0.249              | 0.408        | 0.360        |
| <i>Fusion Mechanism Ablation</i> |              |              |              |              |              |              |              |              |              |                   |              |              |                    |              |              |
| STeVs (Concat)                   | 0.225        | 0.115        | 0.112        | 0.240        | 0.110        | 0.108        | 0.264        | 0.102        | 0.100        | 0.381             | 0.270        | 0.258        | 0.325              | 0.349        | 0.311        |
| STeVs (Deterministic)            | 0.241        | 0.109        | 0.106        | 0.255        | 0.104        | 0.101        | 0.282        | 0.098        | 0.095        | 0.399             | 0.255        | 0.243        | 0.350              | 0.328        | 0.302        |
| STeVs (Cross-Attention)          | 0.155        | 0.148        | 0.145        | 0.242        | 0.134        | 0.133        | 0.255        | 0.128        | 0.120        | 0.313             | 0.290        | 0.280        | 0.268              | 0.354        | 0.314        |
| <i>Spatial Encoder Variants</i>  |              |              |              |              |              |              |              |              |              |                   |              |              |                    |              |              |
| STeVs (Gaussian Process)         | 0.335        | 0.125        | 0.128        | 0.355        | 0.118        | 0.122        | 0.375        | 0.110        | 0.115        | 0.425             | 0.218        | 0.214        | 0.345              | 0.287        | 0.270        |
| STeVs (MLP w/ Fourier)           | 0.330        | 0.128        | 0.130        | 0.351        | 0.121        | 0.125        | 0.370        | 0.113        | 0.118        | 0.421             | 0.223        | 0.219        | 0.340              | 0.291        | 0.275        |
| <i>Architecture Variants</i>     |              |              |              |              |              |              |              |              |              |                   |              |              |                    |              |              |
| STeVs (Convolutional)            | 0.265        | 0.141        | 0.138        | 0.280        | 0.135        | 0.131        | 0.295        | 0.125        | 0.120        | 0.398             | 0.275        | 0.264        | 0.350              | 0.315        | 0.298        |
| STeVs (ViT)                      | 0.166        | 0.140        | 0.134        | 0.232        | 0.145        | 0.147        | 0.241        | 0.139        | 0.135        | 0.318             | 0.301        | 0.309        | 0.261              | 0.394        | 0.356        |
| STeVs w/o Pretrained             | 0.254        | 0.099        | 0.101        | 0.278        | 0.091        | 0.095        | 0.300        | 0.085        | 0.088        | 0.413             | 0.237        | 0.226        | 0.370              | 0.319        | 0.286        |
| <b>STeVs (Ours)</b>              | <b>0.145</b> | <b>0.153</b> | <b>0.152</b> | <b>0.202</b> | <b>0.167</b> | <b>0.166</b> | <b>0.174</b> | <b>0.256</b> | <b>0.231</b> | <b>0.261</b>      | <b>0.362</b> | <b>0.350</b> | <b>0.223</b>       | <b>0.442</b> | <b>0.392</b> |

4.5 IN-DEPTH ANALYSIS OF MODEL GENERALIZATION AND ROBUSTNESS

4.5.1 QUALITATIVE ANALYSIS OF GENE EXPRESSION PREDICTION

To visually evaluate the model’s generalization ability, we visualized the predicted expression for the key gene OLFM1 Maynard et al. (2021); Shen et al. (2025) on the Human3 dataset group. In the stringent cross-slice prediction task (Figure 3), nearly all baseline models fail completely. Their predictions are indistinguishable from noise, often yielding negative SCC. In stark contrast, STEvs is the only method that accurately reconstructs the complex layered structure of OLFM1 on unseen slices while maintaining a high spatial correlation (SCC > 0.56), demonstrating its superior generalization performance. Results from other dataset groups are available in the Appendix G.

4.5.2 LATENT SPACE VISUALIZATION REVEALS EFFECTIVE DOMAIN ADAPTATION

To investigate the source of the model’s generalization ability, we visualized the latent space learned from unseen slices using UMAP (Figure 4). The results show that the Fused Latent space successfully eliminates inter-slice batch effects (top row) while accurately preserving the true biological structure (bottom row). In contrast, the Image Latent space exhibits noticeable batch effects, and the Spatial Latent space fails to effectively distinguish the biological structures. This demonstrates that STEvs learns a slide-invariant, universal representation through its PoE fusion, which is a key factor in the model’s generalization ability.

4.5.3 MODEL ROBUSTNESS UNDER SINGLE-MODALITY INFERENCE

To validate the model’s robustness with incomplete information, we evaluated its single-modality inference performance (Table 5). The results demonstrate that the model remains robust even under adverse conditions with only image or coordinate inputs. Notably, in the cross-slice task, the performance of the single-modality STEvs still surpasses that of most fully-equipped baseline models, which strongly demonstrates the model’s exceptional robustness. Furthermore, the robust performance using only spatial coordinates suggests that our model can also be applied to super-resolution tasks.

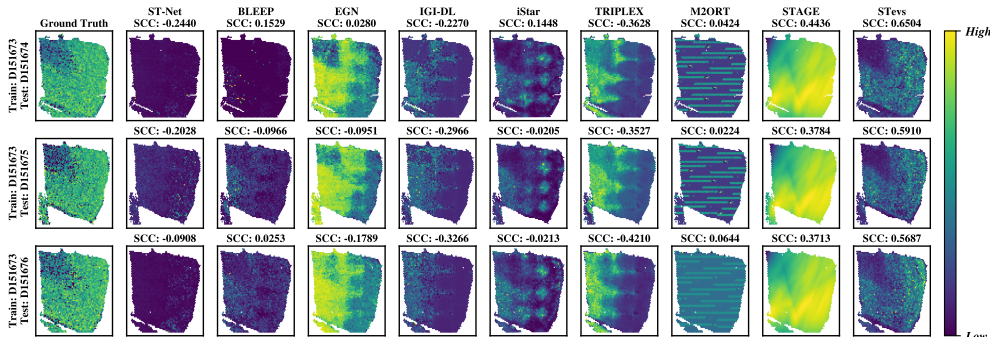

Figure 3: The cross-slice validation results of the OLFM1 gene on the other 3 slices of human3, with D151673 used as the training set

Table 5: Performance Evaluation of STEvs Using Single Modality for Inference

| Inference Mode           | Human 1 |       |       | Human 2 |       |       | Human 3 |       |       | Sagittal-Anterior |       |       | Sagittal-Posterior |       |       |
|--------------------------|---------|-------|-------|---------|-------|-------|---------|-------|-------|-------------------|-------|-------|--------------------|-------|-------|
|                          | MSE ↓   | PCC ↑ | SCC ↑ | MSE ↓   | PCC ↑ | SCC ↑ | MSE ↓   | PCC ↑ | SCC ↑ | MSE ↓             | PCC ↑ | SCC ↑ | MSE ↓              | PCC ↑ | SCC ↑ |
| Image-only (Intra-slice) | 0.155   | 0.201 | 0.190 | 0.203   | 0.265 | 0.254 | 0.181   | 0.279 | 0.248 | 0.260             | 0.391 | 0.375 | 0.224              | 0.463 | 0.405 |
| Image-only (Cross-slice) | 0.189   | 0.130 | 0.128 | 0.258   | 0.141 | 0.139 | 0.223   | 0.215 | 0.198 | 0.334             | 0.302 | 0.291 | 0.287              | 0.388 | 0.344 |
| Spatial-only             | 0.301   | 0.115 | 0.111 | 0.325   | 0.123 | 0.119 | 0.312   | 0.188 | 0.170 | 0.391             | 0.285 | 0.258 | 0.346              | 0.301 | 0.319 |

4.6 ACCURATE RECOVERY OF SPATIAL DOMAINS

As shown in Figure 5, benchmarked against manual annotations, the clustering Adjusted Rand Index (ARI) Hubert & Arabie (1985) score from STEvs’s predictions (0.2098) not only surpasses

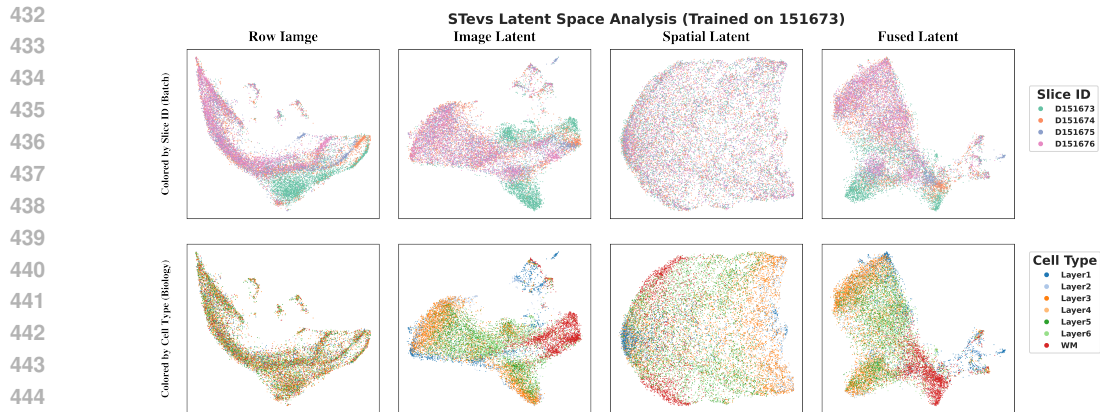

Figure 4: Latent Space Visualization Reveals Effective Domain Adaptation

the baseline iStar (0.0995) but even exceeds the clustering result from the ground truth expression profile itself (0.1692). This suggests that STEvs’s predictions not only faithfully reconstruct the unseen expression profiles from the image but may also serve a denoising function, thereby enabling a more accurate recovery of the tissue architecture. Further details can be found in Appendix H.

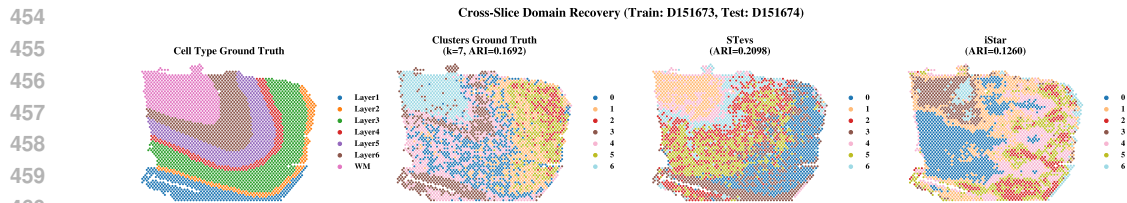

Figure 5: Comparison of Cross-Slice Spatial Domain Recovery Based on Predicted Expression Profiles

## 5 CONCLUSION

This paper introduces STEvs, a deep generative framework designed to address the generalization challenge in cross-slice gene expression prediction for SRT data. The model employs a Product of Experts mechanism to probabilistically fuse visual and spatial representations, while simultaneously learning a unified, slice-invariant representation by leveraging a latent space alignment loss. Extensive experiments demonstrate that STEvs not only outperforms in intra-slice tasks but also exhibits significantly superior cross-slice generalization ability compared to existing methods. Our work provides a powerful tool for large-scale, low-cost virtual spatial transcriptomics analysis, showcasing its immense potential for biomedical research and future clinical applications.

## 6 DISCUSSION

The key to STEvs’ success lies in learning a representation that is robust to slice-level uncertainty. By leveraging probabilistic fusion and an alignment loss, it effectively overcomes inter-slice information discrepancies associated with spatial context, capturing the essential relationship between histology and gene expression, which is crucial for processing clinical samples from diverse sources. Despite its strong performance, STEvs has certain limitations. In particular, it is more suitable for 3D serial sections or slices originating from the same organ, as a certain degree of spatial similarity across slices is required. In future work, we plan to use spatio-temporal Gaussian process modeling Williams & Rasmussen (2006) to enhance the model’s generalization capability.

486 REPRODUCIBILITY STATEMENT  
487

488 To ensure the reproducibility of this research, we provide the complete code, experimental setup,  
489 and data processing steps. Our implementation, developed using the PyTorch framework, has been  
490 released via an anonymous GitHub link. The datasets used in this work are all publicly available;  
491 we provide detailed descriptions and data preprocessing in Appendix D. Hyperparameter settings  
492 and details of the computational environment (including hardware specifications) can be found in  
493 Appendix B and D.2.3 to ensure that the experiments can be precisely reproduced. For the theoretical  
494 parts of the paper, we provide complete proofs and derivations in Appendix A and C.  
495

496 REFERENCES  
497

- 498 Abien Fred Agarap. Deep learning using rectified linear units (relu). *arXiv preprint*  
499 *arXiv:1803.08375*, 2018. doi:10.48550/arXiv.1803.08375. URL [https://arxiv.org/  
500 abs/1803.08375](https://arxiv.org/abs/1803.08375).
- 501 Nicole M Anderson and M Celeste Simon. The tumor microenvironment. *Current Biology*, 30(16):  
502 R921–R925, 2020. doi:10.1016/j.cub.2020.06.081. URL [https://doi.org/10.1016/j.  
503 cub.2020.06.081](https://doi.org/10.1016/j.cub.2020.06.081).
- 504 Alma Andersson, Ludvig Larsson, Linnea Stenbeck, Fredrik Salmén, Anna Ehinger, Sunny Z.  
505 Wu, Ghamdan Al-Eryani, Daniel Roden, Alex Swarbrick, Åke Borg, Jonas Frisé, Camilla  
506 Engblom, and Joakim Lundeberg. Spatial deconvolution of her2-positive breast cancer  
507 delineates tumor-associated cell type interactions. *Nature Communications*, 12(1):  
508 6012, 2021. doi:10.1038/s41467-021-26271-2. URL [https://doi.org/10.1038/  
509 s41467-021-26271-2](https://doi.org/10.1038/s41467-021-26271-2).
- 510 Michaela Asp, Stefania Giacomello, Ludvig Larsson, Chenglin Wu, Daniel Fürth, Xiaoyan Qian,  
511 Eva Wärde, Joaquin Custodio, Johan Reimegård, Fredrik Salmén, Cecilia Österholm, Patrik L.  
512 Ståhl, Erik Sundström, Elisabet Åkesson, Olaf Bergmann, Magda Bienko, Agneta Månsson-  
513 Broberg, Mats Nilsson, Christer Sylvén, and Joakim Lundeberg. A spatiotemporal organ-wide  
514 gene expression and cell atlas of the developing human heart. *Cell*, 179(7):1647–1660, 2019.  
515 doi:10.1016/j.cell.2019.11.025. URL [https://doi.org/10.1016/j.  
516 cell.2019.11.025](https://doi.org/10.1016/j.cell.2019.11.025).
- 517 Tadas Baltrušaitis, Chaitanya Ahuja, and Louis-Philippe Morency. Multimodal machine learning:  
518 A survey and taxonomy. *IEEE Transactions on Pattern Analysis and Machine Intelligence*, 41(2):  
519 423–443, 2018. doi:10.1109/TPAMI.2018.2798607. URL [https://doi.org/10.1109/  
520 TPAMI.2018.2798607](https://doi.org/10.1109/TPAMI.2018.2798607).
- 521 Samuel Bowman, Luke Vilnis, Oriol Vinyals, Andrew Dai, Rafal Jozefowicz, and Samy Bengio.  
522 Generating sentences from a continuous space. In *Proceedings of the 20th SIGNLL conference*  
523 *on computational natural language learning*, pp. 10–21, 2016. doi:10.48550/arXiv.1511.06349.  
524 URL <https://arxiv.org/abs/1511.06349>.
- 525 Darren J Burgess. Spatial transcriptomics coming of age. *Nature Reviews Genetics*, 20(6):  
526 317–317, 2019. doi:10.1038/s41576-019-0129-z. URL [https://doi.org/10.1038/  
527 s41576-019-0129-z](https://doi.org/10.1038/s41576-019-0129-z).
- 528 Wei-Ting Chen, Ashley Lu, Katleen Craessaerts, Benjamin Pavie, Carlo Sala Frigerio, Nikky  
529 Corthout, Xiaoyan Qian, Jana Laláková, Malte Kühnemund, Iryna Voytyuk, Leen Wolfs, Renzo  
530 Mancuso, Evgenia Salta, Sriram Balusu, An Snellinx, Sebastian Munck, Aleksandra Jurek, Jose  
531 Fernandez Navarro, Takaomi C. Saido, Inge Huitinga, Joakim Lundeberg, Mark Fiers, and Bart  
532 De Strooper. Spatial transcriptomics and in situ sequencing to study alzheimer’s disease. *Cell*, 182  
533 (4):976–991, 2020. doi:10.1016/j.cell.2020.06.038. URL [https://doi.org/10.1016/j.  
534 cell.2020.06.038](https://doi.org/10.1016/j.cell.2020.06.038).
- 535 Youngmin Chung, Ji Hun Ha, Kyeong Chan Im, and Joo Sang Lee. Accurate spatial  
536 gene expression prediction by integrating multi-resolution features. In *Proceedings of the*  
537 *IEEE/CVF Conference on Computer Vision and Pattern Recognition*, pp. 11591–11600, 2024.  
538 doi:10.1109/CVPR52733.2024.01101. URL <https://arxiv.org/abs/2403.07592>.  
539

- 540 Thomas M Cover. *Elements of information theory*. John Wiley & Sons, 1999. doi:10.1007/978-3-  
541 642-20180-6\_8. URL [https://doi.org/10.1007/978-3-642-20180-6\\_8](https://doi.org/10.1007/978-3-642-20180-6_8).
- 542
- 543 Guanshen Cui, Kangning Dong, Jia-Yi Zhou, Shang Li, Ying Wu, Qinghua Han, Bofei Yao, Qunlun  
544 Shen, Yong-Liang Zhao, Ying Yang, Jun Cai, Shihua Zhang, and Yun-Gui Yang. Spatiotemporal  
545 transcriptomic atlas reveals the dynamic characteristics and key regulators of planarian regen-  
546 eration. *Nature Communications*, 14(1):3205, 2023. doi:10.1038/s41467-023-39016-0. URL  
547 <https://doi.org/10.1038/s41467-023-39016-0>.
- 548 H. Cui, C. Wang, H. Maan, K. Pang, F. Luo, N. Duan, and B. Wang. scGPT: toward building a  
549 foundation model for single-cell multi-omics using generative AI. *Nature Methods*, 21(8):1470-  
550 1480, Aug 2024. doi:10.1038/s41592-024-02201-0. URL <https://doi.org/10.1038/s41592-024-02201-0>.
- 551
- 552 Jia Deng, Wei Dong, Richard Socher, Li-Jia Li, Kai Li, and Li Fei-Fei. Imagenet: A large-  
553 scale hierarchical image database. In *2009 IEEE conference on computer vision and pat-  
554 tern recognition*, pp. 248–255. Ieee, 2009. doi:10.1109/CVPR.2009.5206848. URL <https://arxiv.org/abs/2010.11929>.
- 555
- 556 Alexey Dosovitskiy, Lucas Beyer, Alexander Kolesnikov, Dirk Weissenborn, Xiaohua Zhai, Thomas  
557 Unterthiner, Mostafa Dehghani, Matthias Minderer, Georg Heigold, and Sylvain Gelly. An  
558 image is worth 16x16 words: Transformers for image recognition at scale. *arXiv preprint  
559 arXiv:2010.11929*, 2020. doi:10.48550/arXiv.2010.11929. URL [https://openreview.  
560 net/forum?id=YicbFdNTTy](https://openreview.net/forum?id=YicbFdNTTy).
- 561
- 562 Gökçen Eraslan, Lukas M Simon, Maria Mircea, Nikola S Mueller, and Fabian J Theis.  
563 Single-cell rna-seq denoising using a deep count autoencoder. *Nature Communications*, 10  
564 (1):390, 2019. doi:10.1038/s41467-018-07931-2. URL <https://doi.org/10.1038/s41467-018-07931-2>.
- 565
- 566 Ruitian Gao, Xin Yuan, Yanran Ma, Ting Wei, Luke Johnston, Yanfei Shao, Wenwen Lv, Tengpeng  
567 Zhu, Yue Zhang, and Junke Zheng. Harnessing tme depicted by histological images to im-  
568 prove cancer prognosis through a deep learning system. *Cell Reports Medicine*, 5(5), 2024.  
569 doi:10.1016/j.xcrm.2024.101536. URL [https://doi.org/10.1016/j.xcrm.2024.  
570 101536](https://doi.org/10.1016/j.xcrm.2024.101536).
- 571 Kai Han, Yunhe Wang, Hanting Chen, Xinghao Chen, Jianyuan Guo, Zhenhua Liu, Yehui Tang,  
572 An Xiao, Chunjing Xu, Yixing Xu, Zhaohui Yang, Yiman Zhang, and Dacheng Tao. A survey  
573 on vision transformer. *IEEE Transactions on Pattern Analysis and Machine Intelligence*, 45(1):  
574 87–110, 2022. doi:10.1109/TPAMI.2022.3152247. URL [https://doi.org/10.1109/  
575 TPAMI.2022.3152247](https://doi.org/10.1109/TPAMI.2022.3152247).
- 576 Bryan He, Ludvig Bergenstråhle, Linnea Stenbeck, Abubakar Abid, Alma Andersson, Åke  
577 Borg, Jonas Maaskola, Joakim Lundberg, and James Zou. Integrating spatial gene expres-  
578 sion and breast tumour morphology via deep learning. *Nature Biomedical Engineering*, 4(8):  
579 827–834, 2020. doi:10.1038/s41551-020-0578-x. URL [https://doi.org/10.1038/  
580 s41551-020-0578-x](https://doi.org/10.1038/s41551-020-0578-x).
- 581 Zhen He, Shuofeng Hu, Yaowen Chen, Sijing An, Jiahao Zhou, Runyan Liu, Junfeng  
582 Shi, Jing Wang, Guohua Dong, and Jinhui Shi. Mosaic integration and knowledge  
583 transfer of single-cell multimodal data with midas. *Nature Biotechnology*, 42(10):1594–  
584 1605, 2024. doi:10.1038/s41587-023-02040-y. URL [https://doi.org/10.1038/  
585 s41587-023-02040-y](https://doi.org/10.1038/s41587-023-02040-y).
- 586
- 587 Geoffrey E Hinton. Training products of experts by minimizing contrastive divergence. *Neural  
588 Computation*, 14(8):1771–1800, 2002. doi:10.1162/089976602760128018. URL [https://  
589 doi.org/10.1162/089976602760128018](https://doi.org/10.1162/089976602760128018).
- 590 Jian Hu, Xiangjie Li, Kyle Coleman, Amelia Schroeder, Nan Ma, David J Irwin, Edward B Lee,  
591 Russell T Shinohara, and Mingyao Li. Spagcn: Integrating gene expression, spatial location  
592 and histology to identify spatial domains and spatially variable genes by graph convolutional  
593 network. *Nature Methods*, 18(11):1342–1351, 2021. doi:10.1038/s41592-021-01255-8. URL  
<https://doi.org/10.1038/s41592-021-01255-8>.

- 594 Lawrence Hubert and Phipps Arabie. Comparing partitions. *Journal of Classification*, 2(1):193–218,  
595 1985. doi:10.1007/BF01908075. URL <https://doi.org/10.1007/BF01908075>.  
596
- 597 Sergey Ioffe and Christian Szegedy. Batch normalization: Accelerating deep network training by  
598 reducing internal covariate shift. In *International conference on machine learning*, pp. 448–  
599 456. pmlr, 2015. doi:10.48550/arXiv.1502.03167. URL [https://arxiv.org/abs/1502.](https://arxiv.org/abs/1502.03167)  
600 03167.
- 601 Mitsue Ishisaka and Hideaki Hara. The roles of diacylglycerol kinases in the central nervous  
602 system: review of genetic studies in mice. *Journal of Pharmacological Sciences*, 124(3):  
603 336–343, 2014. doi:10.1254/jphs.13R07CR. URL [https://www.sciencedirect.com/](https://www.sciencedirect.com/science/article/pii/S1347861319301847)  
604 [science/article/pii/S1347861319301847](https://www.sciencedirect.com/science/article/pii/S1347861319301847).  
605
- 606 Andrew L. Ji, Adam J. Rubin, Kim Thrane, Sizun Jiang, David L. Reynolds, Robin M. Meyers,  
607 Margaret G. Guo, Benson M. George, Annelie Mollbrink, Joseph Bergenstr hle, Ludvig Lars-  
608 son, Yunhao Bai, Bokai Zhu, Aparna Bhaduri, Jordan M. Meyers, Xavier Rovira-Clav , S. Tyler  
609 Hollmig, Sumaira Z. Aasi, Garry P. Nolan, Joakim Lundberg, and Paul A. Khavari. Multimodal  
610 analysis of composition and spatial architecture in human squamous cell carcinoma. *Cell*, 182  
611 (2):497–514, 2020. doi:10.1016/j.cell.2020.05.039. URL [https://doi.org/10.1016/j.](https://doi.org/10.1016/j.cell.2020.05.039)  
612 [cell.2020.05.039](https://doi.org/10.1016/j.cell.2020.05.039).
- 613 Fuqing Jiang, Xin Zhou, Yingying Qian, Miao Zhu, Li Wang, Zhuxia Li, Qingmei Shen, Minhan  
614 Wang, Fangfang Qu, Guizhong Cui, Kai Chen, and Guangdun Peng. Simultaneous profiling of  
615 spatial gene expression and chromatin accessibility during mouse brain development. *Nature*  
616 *Methods*, 20:1048–1057, may 2023. doi:10.1038/s41592-023-01884-1. URL [https://doi.](https://doi.org/10.1038/s41592-023-01884-1)  
617 [org/10.1038/s41592-023-01884-1](https://doi.org/10.1038/s41592-023-01884-1).
- 618 Diederik P Kingma and Max Welling. Auto-encoding variational bayes. *arXiv preprint*  
619 *arXiv:1312.6114*, 2013. doi:10.48550/arXiv.1312.6114. URL [https://arxiv.org/abs/](https://arxiv.org/abs/1312.6114)  
620 [1312.6114](https://arxiv.org/abs/1312.6114).  
621
- 622 Alex Krizhevsky, Ilya Sutskever, and Geoffrey E Hinton. Imagenet classification with deep con-  
623 volutional neural networks. *Advances in Neural Information Processing Systems*, 25, 2012.  
624 doi:10.1145/3065386. URL <https://doi.org/10.1145/3065386>.
- 625 Yann LeCun, Yoshua Bengio, and Geoffrey Hinton. Deep learning. *Nature*, 521(7553):436–444,  
626 2015. doi:10.1038/nature14539. URL <https://doi.org/10.1038/nature14539>.  
627
- 628 Shang Li, Kuo Gai, Kangning Dong, Yiyang Zhang, and Shihua Zhang. High-density gener-  
629 ation of spatial transcriptomics with stage. *Nucleic Acids Research*, 52(9):4843–4856, 2024.  
630 doi:10.1093/nar/gkae294. URL <https://doi.org/10.1093/nar/gkae294>.  
631
- 632 Ze Liu, Yutong Lin, Yue Cao, Han Hu, Yixuan Wei, Zheng Zhang, Stephen Lin, and Baining  
633 Guo. Swin transformer: Hierarchical vision transformer using shifted windows. In *Proceed-*  
634 *ings of the IEEE/CVF international conference on computer vision*, pp. 10012–10022, 2021.  
635 doi:10.48550/arXiv.2103.14030. URL <https://arxiv.org/abs/2103.14030>.
- 636 Yahui Long, Kok Siong Ang, Mengwei Li, Kian Long Kelvin Chong, Raman Sethi, Chengwei  
637 Zhong, Hang Xu, Zhiwei Ong, Karishma Sachaphibulkij, and Ao Chen. Spatially informed clus-  
638 tering, integration, and deconvolution of spatial transcriptomics with graphst. *Nature Communi-*  
639 *cations*, 14(1):1155, 2023. doi:10.1038/s41467-023-36796-3. URL [https://doi.org/10.](https://doi.org/10.1038/s41467-023-36796-3)  
640 [1038/s41467-023-36796-3](https://doi.org/10.1038/s41467-023-36796-3).
- 641 Romain Lopez, Jeffrey Regier, Michael B Cole, Michael I Jordan, and Nir Yosef. Deep generative modeling for single-cell transcriptomics. *Nature methods*, 15(12):1053–  
642 1058, 2018. doi:10.1038/s41592-018-0229-2. URL [https://doi.org/10.1038/](https://doi.org/10.1038/s41592-018-0229-2)  
643 [s41592-018-0229-2](https://doi.org/10.1038/s41592-018-0229-2).  
644
- 645 Ilya Loshchilov and Frank Hutter. Decoupled weight decay regularization. *arXiv preprint*  
646 *arXiv:1711.05101*, 2017. doi:10.48550/arXiv.1711.05101. URL [https://arxiv.org/](https://arxiv.org/abs/1711.05101)  
647 [abs/1711.05101](https://arxiv.org/abs/1711.05101).

- 648 Andrew L Maas, Awni Y Hannun, and Andrew Y Ng. Rectifier nonlinearities improve neural net-  
649 work acoustic models. In *Proc. icml*, volume 30, pp. 3. Atlanta, GA, 2013. URL [https://ai.stanford.edu/~amaas/papers/relu\\_hybrid\\_icml2013\\_final.pdf](https://ai.stanford.edu/~amaas/papers/relu_hybrid_icml2013_final.pdf).  
650
- 651 J MacQueen. Multivariate observations. In *Proceedings of the 5th Berkeley Symposium on Mathe-*  
652 *matical Statistics and Probability*, volume 1, pp. 281–297, 1967. doi:10.48550/arXiv.1802.03426.  
653 URL <https://doi.org/10.48550/arXiv.1802.03426>.  
654
- 655 Kristen R Maynard, Leonardo Collado-Torres, Lukas M Weber, Cedric Uytingco, Brianna K Barry,  
656 Stephen R Williams, Joseph L Catallini, Matthew N Tran, Zachary Besich, and Madhavi Tippani.  
657 Transcriptome-scale spatial gene expression in the human dorsolateral prefrontal cortex. *Nature*  
658 *Neuroscience*, 24(3):425–436, 2021. doi:10.1038/s41593-020-00787-0. URL <https://doi.org/10.1038/s41593-020-00787-0>.  
659
- 660 Leland McInnes, John Healy, and James Melville. Umap: Uniform manifold approxi-  
661 mation and projection for dimension reduction. *arXiv preprint arXiv:1802.03426*, 2018.  
662 doi:10.48550/arXiv.1802.03426. URL [https://doi.org/10.48550/arXiv.1802.](https://doi.org/10.48550/arXiv.1802.03426)  
663 [03426](https://doi.org/10.48550/arXiv.1802.03426).  
664
- 665 Zhen Miao, Tian Tian, Wei Chen, Qianwen Wang, Liang Ma, Dan Zhang, Min Xie, Zijin Yu, Xiya  
666 Guo, Genxiang Bai, Shaoli Zhao, Xi Chen, Wenyi Wang, Yizhou Gao, Shicheng Guo, Ming Luo,  
667 Ling Yuan, Caihuan Tian, Liang Wu, Guangchuang Yu, Dake Zhang, and Shiquan Sun. Spatial  
668 resolved transcriptomics: Computational insights into gene transcription across tissue and organ  
669 architecture in diverse applications. *The Innovation Life*, 2(4):100097, 2024. doi:10.59717/j.xinn-  
670 life.2024.100097. URL [https://doi.org/10.59717/j.xinn-](https://doi.org/10.59717/j.xinn-life.2024.100097)  
671 [life.2024.100097](https://doi.org/10.59717/j.xinn-life.2024.100097).  
672
- 673 Ben Mildenhall, Pratul P Srinivasan, Matthew Tancik, Jonathan T Barron, Ravi Ramamoorthi, and  
674 Ren Ng. Nerf: Representing scenes as neural radiance fields for view synthesis. *Communica-*  
675 *tions of the ACM*, 65(1):99–106, 2021. doi:10.1145/3503250. URL [https://doi.org/10.](https://doi.org/10.1145/3503250)  
676 [1145/3503250](https://doi.org/10.1145/3503250).  
677
- 678 Reuben Moncada, Dalia Barkley, Florian Wagner, Marta Chiodin, Joseph C Devlin, Maayan Baron,  
679 Cristina H Hajdu, Diane M Simeone, and Itai Yanai. Integrating microarray-based spatial tran-  
680 scriptomics and single-cell rna-seq reveals tissue architecture in pancreatic ductal adenocarci-  
681 nomas. *Nature Biotechnology*, 38(3):333–342, 2020. doi:10.1038/s41587-019-0392-8. URL  
682 <https://doi.org/10.1038/s41587-019-0392-8>.  
683
- 684 Taku Monjo, Masaru Koido, Satoi Nagasawa, Yutaka Suzuki, and Yoichiro Kamatani. Efficient  
685 prediction of a spatial transcriptomics profile better characterizes breast cancer tissue sections  
686 without costly experimentation. *Scientific Reports*, 12(1):4133, 2022. doi:10.1038/s41598-022-  
687 07685-4. URL <https://doi.org/10.1038/s41598-022-07685-4>.  
688
- 689 Nikhil Naik, Ali Madani, Andre Esteva, Nitish Shirish Keskar, Michael F Press, Daniel Ru-  
690 derman, David B Agus, and Richard Socher. Deep learning-enabled breast cancer hor-  
691 monal receptor status determination from base-level h&e stains. *Nature Communications*, 11  
692 (1):5727, 2020. doi:10.1038/s41467-020-19334-3. URL [https://doi.org/10.1038/s](https://doi.org/10.1038/s41467-020-19334-3)  
693 [41467-020-19334-3](https://doi.org/10.1038/s41467-020-19334-3).  
694
- 695 Giovanni Palla, Hannah Spitzer, Michal Klein, David Fischer, Anna Christina Schaar,  
696 Louis Benedikt Kuemmerle, Sergei Rybakov, Ignacio L Ibarra, Olle Holmberg, and Isaac Vir-  
697 shup. Squidpy: a scalable framework for spatial omics analysis. *Nature Methods*, 19(2):  
698 171–178, 2022. doi:10.1038/s41592-021-01358-2. URL [https://doi.org/10.1038/s](https://doi.org/10.1038/s41592-021-01358-2)  
699 [41592-021-01358-2](https://doi.org/10.1038/s41592-021-01358-2).  
700
- 701 Minxing Pang, Kenong Su, and Mingyao Li. Leveraging information in spatial transcriptomics to  
702 predict super-resolution gene expression from histology images in tumors. *BioRxiv*, pp. 2021–  
703 11, 2021. doi:10.1101/2021.11.28.470212. URL [https://www.biorxiv.org/content/](https://www.biorxiv.org/content/biorxiv/early/2021/11/28/2021.11.28.470212.full.pdf)  
704 [biorxiv/early/2021/11/28/2021.11.28.470212.full.pdf](https://www.biorxiv.org/content/biorxiv/early/2021/11/28/2021.11.28.470212.full.pdf).  
705
- 706 Karl Pearson. Vii. mathematical contributions to the theory of evolution.—iii. regression,  
707 heredity, and panmixia. *Philosophical Transactions of the Royal Society of London. Se-*  
708 *ries A, containing papers of a mathematical or physical character*, (187):253–318, 1896.  
709 doi:10.1098/rsta.1896.0007. URL <https://doi.org/10.1098/rsta.1896.0007>.  
710

- 702 Xiaojie Qiu, Daniel Y Zhu, Yifan Lu, Jiajun Yao, Zehua Jing, Kyung Hoi Min, Mengnan Cheng,  
703 Hailin Pan, Lulu Zuo, Samuel King, Qi Fang, Huiwen Zheng, Mingyue Wang, Shuai Wang,  
704 Qingquan Zhang, Sichao Yu, Sha Liao, Chao Liu, Xinchao Wu, Yiwei Lai, Shijie Hao, Zhewei  
705 Zhang, Liang Wu, Yong Zhang, Mei Li, Zhencheng Tu, Jinpei Lin, Zhuoxuan Yang, Yuxiang  
706 Li, Ying Gu, David Ellison, Yuancheng Ryan Lu, Qinan Hu, Yuhui Hu, Ao Chen, Longqi Liu,  
707 Jonathan S. Weissman, Jiayi Ma, Xun Xu, Shiping Liu, and Yinqi Bai. Spatiotemporal modeling  
708 of molecular holograms. *Cell*, 187(26):7351–7373, 2024. doi:10.1016/j.cell.2024.10.011. URL  
709 <https://doi.org/10.1016/j.cell.2024.10.011>.
- 710 Alec Radford, Luke Metz, and Soumith Chintala. Unsupervised representation learning with  
711 deep convolutional generative adversarial networks. *arXiv preprint arXiv:1511.06434*, 2015.  
712 doi:10.48550/arXiv.1511.06434. URL <https://arxiv.org/abs/1511.06434>.
- 713 Anjali Rao, Dalia Barkley, Gustavo S França, and Itai Yanai. Exploring tissue architecture using  
714 spatial transcriptomics. *Nature*, 596(7871):211–220, 2021. doi:10.1038/s41586-021-03634-9.  
715 URL <https://doi.org/10.1038/s41586-021-03634-9>.
- 716 Shibani Santurkar, Dimitris Tsipras, Andrew Ilyas, and Aleksander Madry. How does batch  
717 normalization help optimization? *Advances in neural information processing systems*,  
718 31, 2018. URL [https://proceedings.neurips.cc/paper\\_files/paper/2018/  
719 file/905056c1ac1dad141560467e0a99e1cf-Paper.pdf](https://proceedings.neurips.cc/paper_files/paper/2018/file/905056c1ac1dad141560467e0a99e1cf-Paper.pdf).
- 720 Benoît Schmauch, Alberto Romagnoni, Elodie Pronier, Charlie Saillard, Pascale Maillé, Julien  
721 Calderaro, Aurélie Kamoun, Meriem Sefta, Sylvain Toldo, and Mikhail Zaslavskiy. A deep learn-  
722 ing model to predict rna-seq expression of tumours from whole slide images. *Nature Communi-  
723 cations*, 11(1):3877, 2020. doi:10.1038/s41467-020-17678-4. URL [https://doi.org/10.  
724 1038/s41467-020-17678-4](https://doi.org/10.1038/s41467-020-17678-4).
- 725 Amelia Schroeder, Melanie L Loth, Chunyu Luo, Sicong Yao, Hanying Yan, Daiwei Zhang, Sar-  
726 bottam Piya, Edward Plowey, Wenxing Hu, Jean R Clemenceau, Inyeop Jang, Minji Kim, Isabel  
727 Barnfather, Su Jing Chan, Taylor L. Reynolds, Thomas Carlile, Patrick Cullen, Ji-Youn Sung,  
728 Hui-Hsin Tsai, Jeong Hwan Park, Tae Hyun Hwang, Baohong Zhang, and Mingyao Li. Scal-  
729 ing up spatial transcriptomics for large-sized tissues: uncovering cellular-level tissue architecture  
730 beyond conventional platforms with iscale. *Nature Methods*, pp. 1–12, 2025. doi:10.1038/s41592-  
731 025-02770-8. URL [https://doi.org/10.1038/s41592-  
732 025-02770-8](https://doi.org/10.1038/s41592-025-02770-8).
- 733 Yiqi Shen, Yao Shen, Menglei Wang, Kaiyu Jin, Penghui Yang, Zuozhen Cao, Qinfeng Zhu,  
734 Zhiyong Zhao, Haotian Li, Lei Han, Shiping Liu, Jie Liao, Jing Zhang, Xiaohui Fan, and  
735 Dan Wu. A spatial imaging-transcriptomics paradigm for deciphering the molecular ba-  
736 sis of microscopic mri in the normal brain and alzheimer’s disease. *Cell Reports*, 44(8),  
737 2025. doi:10.1016/j.celrep.2025.116073. URL [https://doi.org/10.1016/j.celrep.  
738 2025.116073](https://doi.org/10.1016/j.celrep.2025.116073).
- 739 Charles Spearman. The proof and measurement of association between two things. *The American  
740 Journal of Psychology*, 100(3/4):441–471, 1987. doi:10.2307/1422689. URL [http://www.  
741 jstor.org/stable/1422689](http://www.jstor.org/stable/1422689).
- 742 Nitish Srivastava, Geoffrey Hinton, Alex Krizhevsky, Ilya Sutskever, and Ruslan Salakhutdinov.  
743 Dropout: a simple way to prevent neural networks from overfitting. *The Journal of Machine  
744 Learning Research*, 15(1):1929–1958, 2014. doi:10.48550/arXiv.1803.08375. URL [http://  
745 jmlr.org/papers/v15/srivastava14a.html](http://jmlr.org/papers/v15/srivastava14a.html).
- 746 Patrik L Ståhl, Fredrik Salmén, Sanja Vickovic, Anna Lundmark, José Fernández Navarro, Jens  
747 Magnusson, Stefania Giacomello, Michaela Asp, Jakub O Westholm, and Mikael Huss. Visu-  
748 alization and analysis of gene expression in tissue sections by spatial transcriptomics. *Science*,  
749 353(6294):78–82, 2016. doi:10.1126/science.aaf2403. URL [https://www.science.org/  
750 doi/abs/10.1126/science.aaf2403](https://www.science.org/doi/abs/10.1126/science.aaf2403).
- 751 Robert R Stickels, Evan Murray, Pawan Kumar, Jilong Li, Jamie L Marshall, Daniela J  
752 Di Bella, Paola Arlotta, Evan Z Macosko, and Fei Chen. Highly sensitive spatial tran-  
753 scriptomics at near-cellular resolution with slide-seqv2. *Nature Biotechnology*, 39(3):  
754 313–319, 2021. doi:10.1038/s41587-020-0739-1. URL [https://doi.org/10.1038/  
755 s41587-020-0739-1](https://doi.org/10.1038/s41587-020-0739-1).

- 756 Masahiro Suzuki, Kotaro Nakayama, and Yutaka Matsuo. Joint multimodal learning with deep  
757 generative models. *arXiv preprint arXiv:1611.01891*, 2016. doi:10.48550/arXiv.1611.01891.  
758 URL <https://arxiv.org/abs/1611.01891>.  
759
- 760 Matthew Tancik, Pratul Srinivasan, Ben Mildenhall, Sara Fridovich-Keil, Nithin Raghavan, Utkarsh  
761 Singhal, Ravi Ramamoorthi, Jonathan Barron, and Ren Ng. Fourier features let networks learn  
762 high frequency functions in low dimensional domains. *Advances in neural information process-*  
763 *ing systems*, 33:7537–7547, 2020. URL [https://proceedings.neurips.cc/paper\\_](https://proceedings.neurips.cc/paper_files/paper/2020/file/55053683268957697aa39fba6f231c68-Paper.pdf)  
764 [files/paper/2020/file/55053683268957697aa39fba6f231c68-Paper.pdf](https://proceedings.neurips.cc/paper_files/paper/2020/file/55053683268957697aa39fba6f231c68-Paper.pdf).
- 765 Sophia J Wagner, Daniel Reisenbüchler, Nicholas P West, Jan Moritz Niehues, Jiefu Zhu, Sebas-  
766 tian Foersch, Gregory Patrick Veldhuizen, Philip Quirke, Heike I Grabsch, and Piet A van den  
767 Brandt. Transformer-based biomarker prediction from colorectal cancer histology: A large-scale  
768 multicentric study. *Cancer Cell*, 41(9):1650–1661, 2023. doi:10.1016/j.ccell.2023.08.002. URL  
769 <https://doi.org/10.1016/j.ccell.2023.08.002>.
- 770 Hongyi Wang, Xiuju Du, Jing Liu, Shuyi Ouyang, Yen-Wei Chen, and Lanfen Lin. M2ost: Many-  
771 to-one regression for predicting spatial transcriptomics from digital pathology images. In *Pro-*  
772 *ceedings of the AAAI Conference on Artificial Intelligence*, volume 39, pp. 7709–7717, 2025.  
773 doi:10.18653/v1/K16-1002. URL <https://aclanthology.org/K16-1002/>.  
774
- 775 Mingyue Wang, Qinan Hu, Tianhang Lv, Yuhang Wang, Qing Lan, Rong Xiang, Zhencheng Tu,  
776 Yanrong Wei, Kai Han, Chang Shi, Junfu Guo, Chao Liu, Tao Yang, Wensi Du, Yanru An,  
777 Mengnan Cheng, Jiangshan Xu, Haorong Lu, Wangsheng Li, Shaofang Zhang, Ao Chen, Wei  
778 Chen, Yuxiang Li, Xiaoshan Wang, Xun Xu, Yuhui Hu, and Longqi Liu. High-resolution  
779 3d spatiotemporal transcriptomic maps of developing drosophila embryos and larvae. *Devel-*  
780 *opmental Cell*, 57(10):1271–1283, 2022. doi:10.1016/j.devcel.2022.04.006. URL [https:](https://doi.org/10.1016/j.devcel.2022.04.006)  
781 [//doi.org/10.1016/j.devcel.2022.04.006](https://doi.org/10.1016/j.devcel.2022.04.006).
- 782 Cameron G. Williams, Hyun Jae Lee, Takahiro Asatsuma, Roser Vento-Tormo, and Ashraful Haque.  
783 An introduction to spatial transcriptomics for biomedical research. *Genome Medicine*, 14(1):68,  
784 jun 2022. ISSN 1756-994X. doi:10.1186/s13073-022-01075-1. URL [https://doi.org/](https://doi.org/10.1186/s13073-022-01075-1)  
785 [10.1186/s13073-022-01075-1](https://doi.org/10.1186/s13073-022-01075-1).
- 786 Christopher KI Williams and Carl Edward Rasmussen. *Gaussian processes for machine learn-*  
787 *ing*, volume 2. MIT press Cambridge, MA, 2006. URL [http://gaussianprocess.org/](http://gaussianprocess.org/gpml/chapters/RW.pdf)  
788 [gpml/chapters/RW.pdf](http://gaussianprocess.org/gpml/chapters/RW.pdf).  
789
- 790 F Alexander Wolf, Philipp Angerer, and Fabian J Theis. Scanpy: large-scale single-cell gene ex-  
791 pression data analysis. *Genome Biology*, 19(1):15, 2018. doi:10.1186/s13059-017-1382-0. URL  
792 <https://doi.org/10.1186/s13059-017-1382-0>.  
793
- 794 Mike Wu and Noah Goodman. Multimodal generative models for scalable weakly-  
795 supervised learning. *Advances in Neural Information Processing Systems*, 31, 2018.  
796 doi:10.48550/arXiv.1802.05335. URL <https://arxiv.org/abs/1802.05335>.
- 797 Sunny Z Wu, Ghamdan Al-Eryani, Daniel Lee Roden, Simon Junankar, Kate Harvey, Alma  
798 Andersson, Aatish Thennavan, Chenfei Wang, James R Torpy, and Nenad Bartonicek. A  
799 single-cell and spatially resolved atlas of human breast cancers. *Nature Genetics*, 53(9):  
800 1334–1347, 2021. doi:10.1038/s41588-021-00911-1. URL [https://doi.org/10.1038/](https://doi.org/10.1038/s41588-021-00911-1)  
801 [s41588-021-00911-1](https://doi.org/10.1038/s41588-021-00911-1).
- 802 Ronald Xie, Kuan Pang, Sai Chung, Catia Perciani, Sonya MacParland, Bo Wang, and Gary  
803 Bader. Spatially resolved gene expression prediction from histology images via bi-modal con-  
804 trastive learning. *Advances in Neural Information Processing Systems*, 36:70626–70637, 2023.  
805 doi:10.48550/arXiv.2306.01859. URL <https://arxiv.org/abs/2306.01859>.  
806
- 807 Peng Xu, Xiatian Zhu, and David A Clifton. Multimodal learning with transformers: A sur-  
808 vey. *IEEE Transactions on Pattern Analysis and Machine Intelligence*, 45(10):12113–12132,  
809 2023. doi:10.1109/TPAMI.2023.3275156. URL [https://ieeexplore.ieee.org/](https://ieeexplore.ieee.org/stamp/stamp.jsp?tp=&arnumber=10123038)  
[stamp/stamp.jsp?tp=&arnumber=10123038](https://ieeexplore.ieee.org/stamp/stamp.jsp?tp=&arnumber=10123038).

810 Yan Yang, Md Zakir Hossain, Eric Stone, and Shafin Rahman. Spatial transcriptomics anal-  
811 ysis of gene expression prediction using exemplar guided graph neural network. *Pattern*  
812 *Recognition*, 145:109966, 2024. doi:10.1016/j.patcog.2023.109966. URL <https://www.sciencedirect.com/science/article/pii/S0031320323006647>.  
813  
814 Kun-Hsing Yu, Ce Zhang, Gerald J Berry, Russ B Altman, Christopher Ré, Daniel L Ru-  
815 bin, and Michael Snyder. Predicting non-small cell lung cancer prognosis by fully auto-  
816 mated microscopic pathology image features. *Nature Communications*, 7(1):12474, 2016.  
817 doi:10.1038/ncomms12474. URL <https://doi.org/10.1038/ncomms12474>.  
818  
819 Yuansong Zeng, Zhuoyi Wei, Weijiang Yu, Rui Yin, Yuchen Yuan, Bingling Li, Zhonghui Tang,  
820 Yutong Lu, and Yuedong Yang. Spatial transcriptomics prediction from histology jointly  
821 through transformer and graph neural networks. *Briefings in Bioinformatics*, 23(5), 2022.  
822 doi:10.1093/bib/bbac297. URL <https://doi.org/10.1093/bib/bbac297>.  
823  
824 Daiwei Zhang, Amelia Schroeder, Hanying Yan, Haochen Yang, Jian Hu, Michelle YY Lee,  
825 Kyung S Cho, Katalin Susztak, George X Xu, and Michael D Feldman. Inferring super-resolution  
826 tissue architecture by integrating spatial transcriptomics with histology. *Nature Biotechnology*,  
827 42(9):1372–1377, 2024. doi:10.1038/s41587-023-02019-9. URL <https://doi.org/10.1038/s41587-023-02019-9>.  
828  
829  
830  
831  
832  
833  
834  
835  
836  
837  
838  
839  
840  
841  
842  
843  
844  
845  
846  
847  
848  
849  
850  
851  
852  
853  
854  
855  
856  
857  
858  
859  
860  
861  
862  
863

## APPENDIX

## A MATHEMATICAL DERIVATIONS

In this section, we provide detailed mathematical derivations for the key theoretical components of the STEvs framework.

## A.1 THEORETICAL JUSTIFICATION FOR POE FUSION

Here, we prove that the PoE fusion mechanism yields a posterior distribution with higher certainty (i.e., lower variance) than any of the individual expert distributions Ji et al. (2020). This provides a strong theoretical motivation for its use over simpler fusion methods like feature concatenation or averaging.

**Theorem 1.** *Given two independent Gaussian distributed experts, the variance of the fused distribution obtained via PoE is less than or equal to the variance of each individual expert.*

*Proof.* Let the latent distributions from the image encoder and the spatial encoder be two independent Gaussian "experts":

$$p(z|I) = \mathcal{N}(z|\mu_{\text{img}}, \sigma_{\text{img}}^2) \quad (4)$$

$$p(z|s) = \mathcal{N}(z|\mu_{\text{spatial}}, \sigma_{\text{spatial}}^2) \quad (5)$$

The Product of Experts framework defines the fused distribution  $p_{\text{PoE}}(z)$  by multiplying the probability density functions of the individual experts:

$$p_{\text{PoE}}(z) \propto p(z|I) \cdot p(z|s) \quad (6)$$

The product of two Gaussian distributions is an unnormalized Gaussian. By completing the square, we find that the resulting fused distribution  $p_{\text{PoE}}(z) = \mathcal{N}(z|\mu_{\text{fused}}, \sigma_{\text{fused}}^2)$  has parameters defined by its precision (inverse variance). The precision of the fused distribution is the sum of the individual precisions:

$$\frac{1}{\sigma_{\text{fused}}^2} = \frac{1}{\sigma_{\text{img}}^2} + \frac{1}{\sigma_{\text{spatial}}^2} \quad (7)$$

From Equation 7, since variances are strictly positive ( $\sigma^2 > 0$ ), it directly follows that:

$$\frac{1}{\sigma_{\text{fused}}^2} \geq \frac{1}{\sigma_{\text{img}}^2} \implies \sigma_{\text{fused}}^2 \leq \sigma_{\text{img}}^2 \quad (8)$$

$$\frac{1}{\sigma_{\text{fused}}^2} \geq \frac{1}{\sigma_{\text{spatial}}^2} \implies \sigma_{\text{fused}}^2 \leq \sigma_{\text{spatial}}^2 \quad (9)$$

This proves that the fused posterior distribution is always more certain (has a smaller variance) than any of the individual expert distributions. This property makes PoE a robust mechanism for integrating multimodal information, as it naturally produces a more confident estimate by combining evidence from different sources.

## A.2 INFORMATION-THEORETIC PERSPECTIVE ON LATENT SPACE ALIGNMENT

Here, we provide a theoretical justification for our latent space alignment loss,  $\mathcal{L}_{\text{align}}$ , from an information-theoretic perspective. We argue that minimizing the MSE between **stochastic samples** from the unimodal latent distributions serves as a practical and powerful method for aligning these distributions and maximizing their shared information.

Let  $q(z_{\text{img}})$  and  $q(z_{\text{spatial}})$  be the latent distributions produced by the image and spatial encoders, respectively, where  $q(z_{\text{img}}) = \mathcal{N}(\mu_{\text{img}}, \Sigma_{\text{img}})$  and  $q(z_{\text{spatial}}) = \mathcal{N}(\mu_{\text{spatial}}, \Sigma_{\text{spatial}})$ . A principled way to enforce consistency between these two distributions is to minimize their KL divergence,  $D_{KL}(q(z_{\text{img}})||q(z_{\text{spatial}}))$ .

For two multivariate Gaussian distributions with diagonal covariance matrices, the KL divergence has a closed-form solution He et al. (2020):

$$D_{KL}(q_{\text{img}}||q_{\text{spatial}}) = \frac{1}{2} \left[ \log \frac{|\Sigma_{\text{spatial}}|}{|\Sigma_{\text{img}}|} - d + \text{tr}(\Sigma_{\text{spatial}}^{-1} \Sigma_{\text{img}}) + (\mu_{\text{spatial}} - \mu_{\text{img}})^T \Sigma_{\text{spatial}}^{-1} (\mu_{\text{spatial}} - \mu_{\text{img}}) \right] \quad (10)$$

where  $d$  is the dimensionality of the latent space.

While directly minimizing Equation 10 is a valid approach, it can introduce training instability due to the log-determinant and matrix inversion terms. We therefore adopt a more direct, sampling-based strategy. Our proposed alignment loss,  $\mathcal{L}_{\text{align}}$ , minimizes the squared Euclidean distance between latent variables  $z_{\text{img}}$  and  $z_{\text{spatial}}$  that are sampled from their respective distributions using the reparameterization trick:

$$\mathcal{L}_{\text{align}} = \mathbb{E}_{z_{\text{img}} \sim q_{\text{img}}, z_{\text{spatial}} \sim q_{\text{spatial}}} [\|z_{\text{img}} - z_{\text{spatial}}\|_2^2] \quad (11)$$

In practice, this expectation is approximated with a single sample per training instance.

This objective provides a powerful implicit regularization. By minimizing the distance between the **samples** ( $z$ ), we are not only aligning the **means** ( $\mu$ ) but also encouraging consistency in the **variances** ( $\sigma^2$ ). If the variances were significantly different, the expected distance between samples would remain large even if the means were perfectly aligned. Therefore, this loss term forces the **entire distributions to overlap**, not just their central points. This approach is computationally efficient, stable to train, and has been empirically shown to be highly effective. It directly enforces that the informational content from both modalities maps to a coherent and shared region in the latent space, which is a crucial step towards learning a slide-invariant representation.

### A.3 DERIVATION OF THE EVIDENCE LOWER BOUND (ELBO) FOR STEVS

Here, we show that the composite loss function used to train STEvs is a principled objective derived from maximizing the ELBO on the marginal log-likelihood of the observed data Wang et al. (2022).

Let our observed data be  $X = \{I, R\}$ , representing the histology image and the corresponding RNA expression profile. Our goal is to maximize the marginal log-likelihood  $\log p(X)$ . We introduce a latent variable  $z$  that captures the underlying biological state from which the observations are generated. The marginal log-likelihood is given by:

$$\log p(X) = \log \int p(X, z) dz \quad (12)$$

Directly optimizing this integral is intractable. Therefore, we introduce an approximate posterior distribution  $q_\phi(z|I, s)$ , parameterized by an encoder with parameters  $\phi$ , which takes both the image  $I$  and spatial coordinates  $s$  as input to approximate the true posterior  $p(z|X)$ . In STEvs,  $q_\phi(z|I, s)$  is the PoE-fused distribution.

We can rewrite the marginal log-likelihood as:

$$\log p(X) = \log \int p(X, z) \frac{q_\phi(z|I, s)}{q_\phi(z|I, s)} dz \quad (13)$$

$$= \log \mathbb{E}_{q_\phi(z|I, s)} \left[ \frac{p(X, z)}{q_\phi(z|I, s)} \right] \quad (14)$$

By applying Jensen’s inequality, we obtain the ELBO, denoted as  $\mathcal{L}$ :

$$\log p(X) \geq \mathbb{E}_{q_\phi(z|I, s)} \left[ \log \frac{p(X, z)}{q_\phi(z|I, s)} \right] \quad (15)$$

$$\mathcal{L}(\phi, \theta; X, s) = \mathbb{E}_{q_\phi(z|I, s)} [\log p_\theta(X|z) + \log p(z) - \log q_\phi(z|I, s)] \quad (16)$$

$$= \mathbb{E}_{q_\phi(z|I, s)} [\log p_\theta(X|z)] - D_{KL}(q_\phi(z|I, s) || p(z)) \quad (17)$$

where  $p_\theta(X|z)$  is the decoder parameterized by  $\theta$ , and  $p(z)$  is the prior distribution over the latent space, which we set to a standard normal distribution  $\mathcal{N}(0, I)$ .

Assuming conditional independence between the image and RNA data given the latent variable  $z$ , the reconstruction term can be decomposed:

$$p_\theta(X|z) = p_{\theta_I}(I|z) \cdot p_{\theta_R}(R|z) \quad (18)$$

Substituting this back into Equation 17, we get:

$$\mathcal{L} = \underbrace{\mathbb{E}_{q_\phi} [\log p_{\theta_I}(I|z)]}_{\text{Image Recon.}} + \underbrace{\mathbb{E}_{q_\phi} [\log p_{\theta_R}(R|z)]}_{\text{Gene Recon.}} - \underbrace{D_{KL}(q_\phi(z|I, s) || p(z))}_{\text{KL Regularization}} \quad (19)$$

Maximizing this ELBO is equivalent to minimizing its negative. Each term corresponds to a component of our loss function:

- $-\mathbb{E}_{q_\phi}[\log p_{\theta_I}(I|z)]$  corresponds to the image reconstruction loss  $L_{\text{img}}$ , which is implemented as an MSE loss under a Gaussian likelihood assumption.
- $-\mathbb{E}_{q_\phi}[\log p_{\theta_R}(R|z)]$  corresponds to the gene expression reconstruction loss  $L_{\text{rna}}$ , implemented as the Negative Log-Likelihood of the Negative Binomial distribution.
- $D_{KL}(q_\phi(z|I, s)||p(z))$  is the KL divergence loss  $L_{\text{KLD}}$ .

Finally, we introduce the latent space alignment loss  $L_{\text{align}}$  as an additional regularization term to enforce consistency between the modality-specific encoders. This term is not derived from the ELBO itself but is added to the objective to improve generalization, a common practice in representation learning. Thus, our final objective is to minimize the total loss  $L_{\text{total}}$ , which is equivalent to maximizing a regularized ELBO:

$$\min_{\phi, \theta} L_{\text{total}} \iff \max_{\phi, \theta} (\mathcal{L} - \gamma L_{\text{align}}) \tag{20}$$

## B STEVS MODEL ARCHITECTURE

Table 6: Detailed architecture of the STEvs model. The table outlines the layers, specifications, and output dimensions for each component of the network, from the parallel encoders to the multi-task decoders.

| Component       | Module / Layer                                                         | Specification                                                                     | Output Dimension                          |
|-----------------|------------------------------------------------------------------------|-----------------------------------------------------------------------------------|-------------------------------------------|
| Image Encoder   | Input Image Patches                                                    | 3-channel RGB image                                                               | (3, 160, 160)                             |
|                 | Patch Embedding (Conv2d)                                               | kernel=(4,4), stride=(4,4)                                                        | (96, 40, 40)                              |
|                 | Swin Stage 1 (2 blocks)                                                | Window Attention, MLP                                                             | (96, 40, 40)                              |
|                 | Patch Merging + Swin Stage 2 (2 blocks)                                | Downsamples feature map                                                           | (192, 20, 20)                             |
|                 | Patch Merging + Swin Stage 3 (6 blocks)                                | Downsamples feature map                                                           | (384, 10, 10)                             |
|                 | Patch Merging + Swin Stage 4 (2 blocks)                                | Downsamples feature map                                                           | (768, 5, 5)                               |
|                 | Global Average Pooling                                                 | -                                                                                 | 768                                       |
|                 | Latent Head ( $\mu_{\text{img}}, \log \sigma_{\text{img}}^2$ )         | Two Linear Layers                                                                 | $2 \times 128$                            |
| Spatial Encoder | Input Coordinates                                                      | Normalized (x, y) coordinates                                                     | 2                                         |
|                 | MLP (2 hidden layers)                                                  | Linear(2, 64) $\rightarrow$ ReLU $\rightarrow$ Linear(64, 128) $\rightarrow$ ReLU | 128                                       |
|                 | Latent Head ( $\mu_{\text{spatial}}, \log \sigma_{\text{spatial}}^2$ ) | Two Linear Layers                                                                 | $2 \times 128$                            |
| Fusion          | PoE                                                                    | Fuses image and spatial latent distributions                                      | Fused Latent ( $z \in \mathbb{R}^{128}$ ) |
| Image Decoder   | Input Linear Layer                                                     | Projects $z$ and reshapes                                                         | (256, 20, 20)                             |
|                 | Upsampling Stage 1 (ConvT + ConvBlock)                                 | ConvTranspose2d(256, 128), stride=2                                               | (128, 40, 40)                             |
|                 | Upsampling Stage 2 (ConvT + ConvBlock)                                 | ConvTranspose2d(128, 64), stride=2                                                | (64, 80, 80)                              |
|                 | Upsampling Stage 3 (ConvT + ConvBlock)                                 | ConvTranspose2d(64, 32), stride=2                                                 | (32, 160, 160)                            |
|                 | Final Layer (Conv2d + Tanh)                                            | kernel=(3,3), padding=1                                                           | (3, 160, 160)                             |
| Gene Decoder    | Base MLP (2 hidden layers)                                             | Linear(128, 256) $\rightarrow$ BN/ReLU/Dropout $\rightarrow$ Linear(256, 512)     | 512                                       |
|                 |                                                                        | BN/ReLU/Dropout                                                                   |                                           |
|                 | Mean ( $\mu$ ) Head                                                    | Linear(512, 2350) $\rightarrow$ Softplus                                          | 2350                                      |
|                 | Dispersion ( $\theta$ ) Head                                           | Linear(512, 2350) $\rightarrow$ Softplus                                          | 2350                                      |

## C DETAILED EXPLANATION OF THE STEVS MODEL ARCHITECTURE

### C.1 MODEL OVERVIEW

STEvS is a deep generative model based on a MM-VAESuzuki et al. (2016), designed to robustly predict spatially resolved transcriptomics by fusing visual histological information from histological images with their spatial positional context. The core architecture of the model consists of three main components:

- Parallel dual-path encoders that process images and spatial coordinates, respectively. The image encoder adopts a hierarchical vision Transformer Liu et al. (2021), while the spatial encoder uses a MLP LeCun et al. (2015).
- A probabilistic fusion module based on the PoE Hinton (2002), used to integrate the latent distributions generated by the dual-path encoders.
- A multi-task decoder that is simultaneously responsible for image reconstruction and the generation of gene expression profiles based on the Negative Binomial Distribution Lopez et al. (2018).

## C.2 DETAILED NETWORK STRUCTURE

### C.2.1 IMAGE HISTOLOGY ENCODER

This encoder is responsible for extracting rich, hierarchical visual features from the input histological image patches.

- **Input:** An image patch  $I_i \in \mathbb{R}^{N \times H \times W \times C}$ , where  $H$  and  $W$  are the height and width of a single spot’s image patch,  $C$  is the number of channels (for RGB images,  $C = 3$ ), and  $N$  is the total number of neighborhood patches.
- **Backbone Network:** We use a Swin Transformer Liu et al. (2021) as the feature extraction backbone. This network, through its hierarchical structure and shifted window self-attention mechanism Liu et al. (2021), can effectively capture long-range dependencies within the image, which is crucial for understanding complex tissue structures Dosovitskiy et al. (2020).
- **Feature Extraction:** The Swin Transformer maps the input image  $I_i$  to a fixed-dimensional feature vector  $f_{\text{img}} \in \mathbb{R}^{D_{\text{feat}}}$ .

$$f_{\text{img}} = \text{SwinTransformer}(I_i) \quad (21)$$

- **Latent Space Mapping:** This feature vector  $f_{\text{img}}$  is then passed through two independent fully connected (FC) layers Lopez et al. (2018) to generate the mean vector  $\mu_{\text{img}} \in \mathbb{R}^{D_{\text{latent}}}$  and the log-variance vector  $\log \sigma_{\text{img}}^2 \in \mathbb{R}^{D_{\text{latent}}}$  of the image modality latent space, respectively.

$$\mu_{\text{img}} = \text{FC}_{\mu, \text{img}}(f_{\text{img}}) \quad (22)$$

$$\log \sigma_{\text{img}}^2 = \text{FC}_{\sigma, \text{img}}(f_{\text{img}}) \quad (23)$$

To leverage the prior knowledge from large-scale natural image datasets, our Swin Transformer backbone loads weights pre-trained on the ImageNet dataset Deng et al. (2009).

### C.2.2 SPATIAL CONTEXT ENCODER

This encoder is used to capture the global positional information of each image patch within the tissue slice.

- **Input:** A two-dimensional spatial coordinate vector  $s_i = (x_i, y_i) \in \mathbb{R}^2$ , representing the center coordinates of the image patch  $I_i$ .
- **Network Structure:** We use a Multilayer Perceptron [3] with two hidden layers to perform a non-linear transformation on the coordinate information. The activation function in the network is the Rectified Linear Unit (ReLU).
- **Feature Extraction:** The MLP maps the input coordinates  $s_i$  to a high-dimensional feature vector  $f_{\text{spatial}} \in \mathbb{R}^{D_{\text{hidden}}}$ .

$$f_{\text{spatial}} = \text{MLP}_{\text{spatial}}(s_i) \quad (24)$$

- **Latent Space Mapping:** Similar to the image encoder,  $f_{\text{spatial}}$  is passed through two independent fully connected layers to generate the mean vector  $\mu_{\text{spatial}} \in \mathbb{R}^{D_{\text{latent}}}$  and the log-variance vector  $\log \sigma_{\text{spatial}}^2 \in \mathbb{R}^{D_{\text{latent}}}$  of the spatial modality latent space.

$$\mu_{\text{spatial}} = \text{FC}_{\mu, \text{sp}}(f_{\text{spatial}}) \quad (25)$$

$$\log \sigma_{\text{spatial}}^2 = \text{FC}_{\sigma, \text{sp}}(f_{\text{spatial}}) \quad (26)$$

### C.2.3 MULTIMODAL FUSION AND LATENT SPACE SAMPLING

- **PoE Fusion** To integrate information from the two modalities and their respective uncertainties, we adopt the PoE framework Hinton (2002). We sum the precisions (the inverse of the variance) of the latent distributions output by the two encoders (both are Gaussian distributions) to calculate the precision of the fused distribution, and then derive the fused mean and variance.

1080                   – **Precision Calculation:**

$$1081 \quad T_{\text{img}} = (\sigma_{\text{img}}^2)^{-1} = \exp(-\log \sigma_{\text{img}}^2) \quad (27)$$

$$1082 \quad T_{\text{spatial}} = (\sigma_{\text{spatial}}^2)^{-1} = \exp(-\log \sigma_{\text{spatial}}^2) \quad (28)$$

1083  
1084  
1085                   – **Fused Distribution Parameters:**

$$1086 \quad \sigma_{\text{fused}}^2 = (T_{\text{img}} + T_{\text{spatial}})^{-1} \quad (29)$$

$$1087 \quad \mu_{\text{fused}} = (\mu_{\text{img}} T_{\text{img}} + \mu_{\text{spatial}} T_{\text{spatial}}) \sigma_{\text{fused}}^2 \quad (30)$$

1088  
1089  
1090 • **Reparameterization Sampling** To enable backpropagation of gradients through the sam-  
1091 pling process, we use the reparameterization trick Kingma & Welling (2013). We sample  
1092 a random noise vector  $\epsilon \sim \mathcal{N}(0, I)$  from a standard normal distribution and then generate  
1093 the final latent vector  $z \in \mathbb{R}^{D_{\text{latent}}}$ .

$$1094 \quad z = \mu_{\text{fused}} + \sigma_{\text{fused}} \odot \epsilon \quad (31)$$

1095  
1096 where  $\odot$  denotes element-wise multiplication.

### 1097 C.3 MULTI-TASK DECODER

#### 1098 C.3.1 IMAGE RECONSTRUCTION DECODER

1099 This decoder reconstructs the original histological image from the latent vector  $z$ .

- 1100 • **Initial Transformation:** First, a fully connected layer projects  $z$  into a high-dimensional  
1101 space and reshapes it into a small 3D feature map  $h_{\text{img}} \in \mathbb{R}^{C' \times H' \times W'}$  to serve as the  
1102 starting point for subsequent convolutional operations.
- 1103 • **Upsampling:** Next, a series of transposed convolution modules (including ConvTrans-  
1104 pose2d Radford et al. (2015), BatchNorm2d Santurkar et al. (2018), and LeakyReLU Maas  
1105 et al. (2013)) are used to progressively increase the spatial dimensions of the feature map  
1106 while reducing its number of channels.
- 1107 • **Final Output:** The final layer is a  $3 \times 3$  convolutional layer that maps the feature map’s  
1108 channel count back to the number of channels of the input image,  $C$ . A Tanh activation  
1109 function Chen et al. (2020) is then used to normalize the output pixel values to the range  
1110  $[-1, 1]$ , yielding the reconstructed image  $I_{\text{recon}}$ .

#### 1111 C.3.2 GENE EXPRESSION DECODER

1112 This decoder generates the distribution parameters for the gene expression profile from the latent  
1113 vector  $z$ .

- 1114 • **Feature Transformation:** The latent vector  $z$  is first passed through an MLP network,  
1115 which includes Batch Normalization (BatchNorm1d) Ioffe & Szegedy (2015), ReLU  
1116 Agarap (2018), and Dropout Srivastava et al. (2014), to extract high-level features  $h_{\text{rna}}$   
1117 for gene expression prediction.
- 1118 • **Parameter Prediction:** The feature vector  $h_{\text{rna}}$  is then fed into two independent linear  
1119 output layers, which are used to predict the mean parameter  $\mu_{\text{rna}} \in \mathbb{R}^M$  and the dispersion  
1120 parameter  $\theta_{\text{rna}} \in \mathbb{R}^M$  of the NB distribution, where  $M$  is the number of target genes.

$$1121 \quad \mu_{\text{rna}} = \text{Softplus}(\text{Linear}_{\mu_{\text{rna}}}(h_{\text{rna}})) \quad (32)$$

$$1122 \quad \theta_{\text{rna}} = \text{Softplus}(\text{Linear}_{\theta_{\text{rna}}}(h_{\text{rna}})) \quad (33)$$

1123 We use the Softplus activation function Baltrušaitis et al. (2018) to ensure that the values of  $\mu_{\text{rna}}$   
1124 and  $\theta_{\text{rna}}$  are positive, which is consistent with the parameter definition of the Negative Binomial  
1125 distribution.

## C.4 LOSS FUNCTION AND OPTIMIZATION

### C.4.1 COMPOSITE LOSS FUNCTION

The training objective of STEvs is optimized through a carefully designed composite loss function  $L_{\text{total}}$ , which consists of four components:

$$L_{\text{total}} = \lambda_{\text{img}} L_{\text{img}} + \lambda_{\text{rna}} L_{\text{rna}} + \beta L_{\text{KLD}} + \gamma L_{\text{align}} \quad (34)$$

- **Image Reconstruction Loss ( $L_{\text{img}}$ )** We use the MSE to measure the difference between the reconstructed image  $I_{\text{recon}}$  and the original image  $I_{\text{true}}$ :

$$L_{\text{img}} = \frac{1}{N} \sum_{i=1}^N \|I_{\text{recon}}(i) - I_{\text{true}}(i)\|_2^2 \quad (35)$$

- **Gene Expression Reconstruction Loss ( $L_{\text{rna}}$ )** We use the Negative Log-Likelihood (NLL) Lopez et al. (2018) of the Negative Binomial distribution. The probability mass function (PMF) of the Negative Binomial distribution is defined as:

$$P(Y = k | \mu, \theta) = \frac{\Gamma(k + \theta)}{\Gamma(k + 1)\Gamma(\theta)} \left(\frac{\theta}{\theta + \mu}\right)^\theta \left(\frac{\mu}{\theta + \mu}\right)^k \quad (36)$$

where  $\Gamma(\cdot)$  is the Gamma function.

- **KL Divergence Loss ( $L_{\text{KLD}}$ )** As a standard component of the VAE framework Kingma & Welling (2013), we use the KL divergence to regularize the fused latent space. For a single sample, its analytic form is Cover (1999):

$$L_{\text{KLD}} = \frac{1}{2} \sum_{j=1}^{D_{\text{latent}}} (\sigma_{\text{fused},j}^2 + \mu_{\text{fused},j}^2 - 1 - \log \sigma_{\text{fused},j}^2) \quad (37)$$

- **Latent Space Alignment Loss ( $L_{\text{align}}$ )** We introduce an additional MSE loss to encourage different modality encoders to learn semantically aligned representations Radford et al. (2015); Wu & Goodman (2018). This loss directly pulls the mean vectors of the two modalities closer in the latent space.

### C.4.2 OPTIMIZATION STRATEGY

- **KL Annealing** To stabilize the training of the VAE, we adopt a KL annealing strategy Bowman et al. (2016). The weight  $\beta$  in the loss function is dynamically adjusted during training, its value increasing linearly from 0 to a preset maximum value  $\beta_{\text{max}}$  with training epoch  $e$ , and then remaining constant.

$$\beta_e = \beta_{\text{max}} \cdot \min\left(1.0, \frac{e}{E_{\text{anneal}}}\right) \quad (38)$$

where  $E_{\text{anneal}}$  is the total number of annealing epochs.

- **Optimizer** We use the AdamW optimizer Loshchilov & Hutter (2017) to update all learnable parameters of the model. Compared to the traditional Adam, AdamW typically provides better generalization performance by decoupling weight decay from the gradient update.

## D DATA PROCESSING AND EXPERIMENTAL DESIGN

### D.1 DATASETS AND PREPROCESSING

#### D.1.1 DATA SOURCES

Our study utilized a total of five dataset groups from two sources. The first three groups are from the public human dorsolateral prefrontal cortex (DLPFC) dataset Maynard et al. (2021), comprising 12 tissue sections from 3 different individuals. The latter two groups are public Visium mouse

1188 brain datasets from the 10x Genomics platform Ståhl et al. (2016), containing 4 tissue sections  
 1189 from the same rmice but different egion. An overview of these datasets is provided in Figure 6 and  
 1190 Table 7. Additionally, to further validate the model’s generalization ability, we conducted extended  
 1191 experiments on the Human Breast Cancer (HBC) Wu et al. (2021) and HSC Ji et al. (2020) datasets.  
 1192 These datasets is provided in Figure 22.

### 1194 D.1.2 IMAGE PREPROCESSING

1196 For each spot, we extracted image patches from the corresponding high-resolution H&E stained  
 1197 whole-slide image (Figure 7). Specifically, we defined a perceptual field of a  $5 \times 5$  grid of base  
 1198 patches centered on each spot’s coordinates. With each base patch having a resolution of  $32 \times 32$   
 1199 pixels, this resulted in a final input image tensor of  $160 \times 160 \times 3$  for the model, capturing both the  
 1200 fine-grained histology of the target spot and its adjacent microenvironment. Prior to being fed into  
 1201 the model, all image patches were normalized to the range  $[-1, 1]$  using min-max normalization to  
 1202 stabilize training:

$$1203 I_{\text{norm}} = \frac{2(I - I_{\min})}{I_{\max} - I_{\min}} - 1 \quad (39)$$

1206 where  $I$  is the original pixel value, and  $I_{\min}$  and  $I_{\max}$  are the minimum and maximum pixel values  
 1207 within the patch, respectively. The normalized patches also serve as the ground truth target for the  
 1208 image reconstruction task.

### 1210 D.1.3 SPATIAL COORDINATE PREPROCESSING

1212 For each image patch, we extract the corresponding 2D coordinate vector  $(x_i, y_i)$  from the tissue  
 1213 position file. These coordinates, representing the relative center position of the spot within the  
 1214 whole-slide image, are normalized and directly fed into the spatial encoder to preserve the global  
 1215 positional context of each patch. Generally, for relatively well-aligned slices, no operation on the  
 1216 spatial coordinates is necessary. However, for slices with discrepancies such as rotation or dis-  
 1217 placement, we recommend flattening the image patch corresponding to the coordinates to serve as  
 1218 features, and then using `Spateo` for coordinate alignment Qiu et al. (2024).

### 1219 D.1.4 GENE EXPRESSION PREPROCESSING

1221 Given the high dimensionality and sparsity of SRT data, we performed a gene filtering step to iden-  
 1222 tify SVGs. Using `scanpy` Wolf et al. (2018) and `squidpy` Palla et al. (2022), we calculated  
 1223 spatial autocorrelation (Moran’s I) for each gene and retained those with a p-value less than 0.05. To  
 1224 ensure robustness, a gene was only included in the final set if it was identified as an SVG in at least  
 1225 two samples within the same dataset group. After filtering, each group contained over 2,000 SVGs.  
 1226 These filtered gene expression profiles serve as the ground truth target for the gene expression de-  
 1227 coder, which models them using a Negative Binomial distribution to account for their count-based  
 1228 and over-dispersed nature.

## 1230 D.2 EXPERIMENTAL DESIGN AND EVALUATION

### 1232 D.2.1 EXPERIMENTAL SETTINGS

1234 We evaluated model performance under two distinct settings:

- 1235 • **Intra-slice Prediction:** For each slice, we randomly and independently split the spots into  
 1236 training, validation, and test sets with a 7:1:2 ratio to perform standard cross-validation  
 1237 within a single tissue slice.
- 1238 • **Cross-slice Prediction:** To assess generalization, we employed a more challenging leave-  
 1239 one-out approach within each dataset group. One slice was used for training and all other  
 1240 slices in the group were used for testing (as illustrated in Fig. 2c). This setup mimics the  
 1241 real-world scenario of applying a pre-trained model to new, unseen patient samples.

## 1242 D.2.2 EVALUATION METRICS

1243 To quantitatively evaluate the model’s prediction accuracy for gene expression, we employed three  
1244 standard statistical metrics Andersson et al. (2021); Asp et al. (2019):

- 1246 • **Mean Squared Error (MSE)** Kingma & Welling (2013): To measure the average squared  
1247 difference between predicted and actual gene expression values.
- 1248 • **Pearson Correlation Coefficient (PCC)** Pearson (1896): To assess the linear relationship  
1249 between predicted and ground-truth expression profiles.
- 1250 • **Spearman’s Rank Correlation Coefficient (SCC)** Spearman (1987): To evaluate the  
1251 monotonic relationship, which is robust to outliers.

## 1253 D.2.3 EXPERIMENTAL SETUP

1254 **Hardware Configuration** Our experiments were conducted on a high-performance server  
1255 equipped with four NVIDIA A100 GPUs (80GB of VRAM each), dual Intel(R) Xeon(R) Gold  
1256 6267C CPUs, and 1.5TB of system memory. The runtimes reported in the main paper are for model  
1257 inference on a single GPU.

1258 **Training Parameters** We trained all models for 100 epochs using a learning rate of  $1 \times 10^{-4}$  on  
1259 four NVIDIA A100 (80GB) GPUs. A comprehensive list of all training hyperparameters is provided  
1260 in Appendix J.

1261 **Loss Function Weights** In our experiments, the default weights for the composite loss function  
1262 were set to  $\lambda_{\text{img}} = 1.0$ ,  $\lambda_{\text{ma}} = 10.0$ ,  $\beta = 0.5$ , and  $\gamma = 0.5$ . A detailed sensitivity analysis of these  
1263 weights on model performance is discussed in Appendix I.

## 1264 D.2.4 BASELINE SET

1265 For the baseline models, we strictly adhered to their officially provided pipelines for training and  
1266 evaluation, making minor adaptive modifications to some for compatibility. Notably, since iStar’s  
1267 methodology involves predicting all spots at once, we employed a masking strategy during the intra-  
1268 slice training phase to conceal the test set samples and prevent data leakage. For the STAGE model,  
1269 we deviated from its provided pipeline, which calculates metrics on the combined training and test  
1270 sets. To maintain consistency and ensure a fair comparison with all other methods, we adopted a  
1271 stricter approach, evaluating its performance exclusively on the test set.

# 1272 E MAIN PERFORMANCE DETAILS

## 1273 E.1 DLPFC ON INTRA-SLICE EXPERIMENTS

1274 As shown in Table 9, in the intra-slice experiments conducted on the DLPFC datasets, we systemat-  
1275 ically evaluated the performance of our STeVs model against various existing mainstream methods.  
1276 This evaluation was performed on three public datasets: Human 1, Human 2, and Human 3. The  
1277 evaluation metrics include MSE, PCC, and SCC. The experimental results clearly indicate that our  
1278 STeVs model achieves optimal performance across all three datasets and on all three evaluation met-  
1279 rics. This data provides strong evidence for the superiority and robustness of the STeVs model in the  
1280 task of intra-slice spatial gene expression prediction.

## 1281 E.2 DLPFC ON CROSS-SLICE EXPERIMENTS

1282 To further evaluate the model’s generalization ability, this subsection presents the results from the  
1283 more challenging cross-slice experiments. In this setting, the model must utilize information from  
1284 the training slices to predict the gene expression profile of a completely unseen slice from the same  
1285 tissue, posing a stringent test of its knowledge transfer capabilities. As detailed in Table 9, the per-  
1286 formance comparison on the DLPFC datasets (Human 1, 2, and 3) shows that most baseline models  
1287 suffered a significant performance drop due to their inability to generalize effectively. The predic-  
1288 tions of some models were even indistinguishable from random noise (with PCC/SCC values close to  
1289

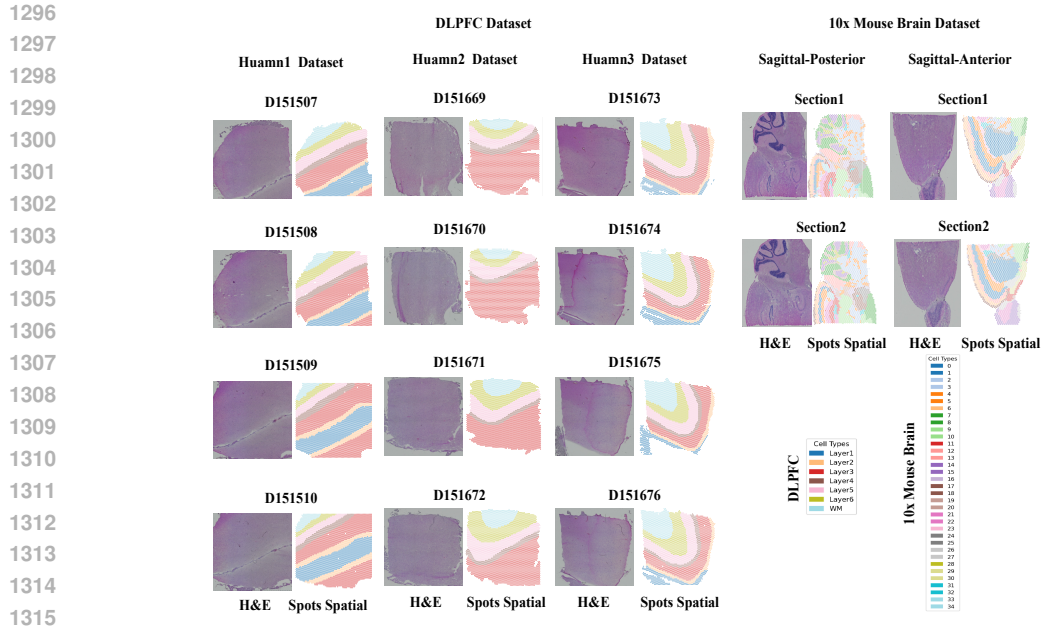

Figure 6: Overview of the primary spatial transcriptomics datasets used in this study. The figure shows the H&E images and their corresponding annotated cell type/tissue layer maps for a total of 16 datasets from five groups.

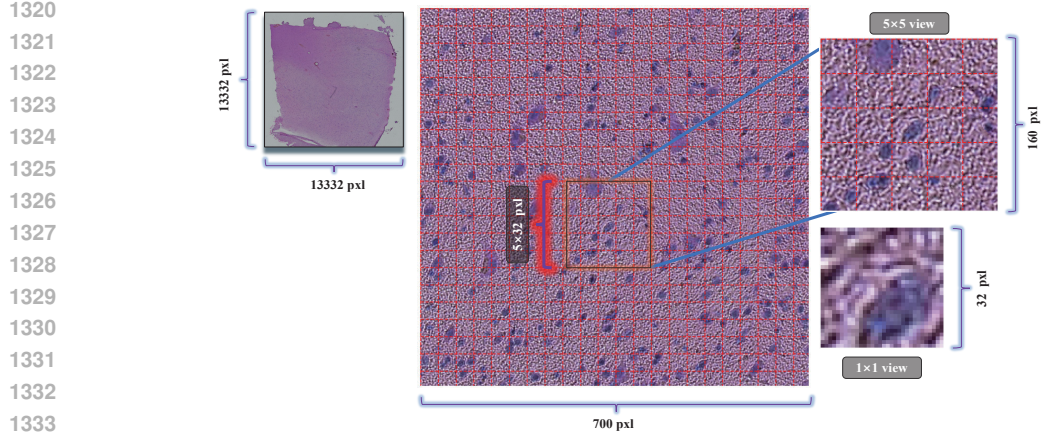

Figure 7: Schematic diagram of the image patch extraction process from a whole-slide H&E image

zero or negative). However, the STEvs model still performed exceptionally well in this rigorous test, with its performance significantly surpassing all competing methods across all metrics. Specifically, compared to the best-performing baseline model, iStar, STEvs demonstrated a substantial advantage in correlation metrics (PCC and SCC). For example, on the Human 3 dataset, the PCC of STEvs reached 0.256, far exceeding iStar’s 0.122. This result provides strong evidence for the powerful cross-slice generalization ability of the STEvs model, showcasing its capacity to effectively transfer spatial pattern knowledge learned from training slices to new, unseen target slices.

### E.3 10X MOUSE BRAIN ON INTRA-SLICE EXPERIMENTS

To further validate our model’s broad applicability and cross-species generalization ability, we also conducted a series of rigorous intra-slice performance evaluations on the 10x Mouse Brain dataset. As shown in Table 10, we performed a comprehensive performance comparison between STEvs and various mainstream baseline models on two different brain region slices: Sagittal-Anterior and

1350  
1351  
1352  
1353  
1354  
1355  
1356  
1357  
1358  
1359  
1360  
1361  
1362  
1363  
1364  
1365  
1366  
1367  
1368  
1369  
1370  
1371  
1372  
1373  
1374  
1375  
1376  
1377  
1378  
1379  
1380  
1381  
1382  
1383  
1384  
1385  
1386  
1387  
1388  
1389  
1390  
1391  
1392  
1393  
1394  
1395  
1396  
1397  
1398  
1399  
1400  
1401  
1402  
1403

Table 7: Spots and Gene Counts per Sample Group

| Group              | Sample                             | Spots Number | Gene Number |
|--------------------|------------------------------------|--------------|-------------|
| Human 1            | DLPFC 151507                       | 4221         | 2239        |
|                    | DLPFC 151508                       | 4381         | 2239        |
|                    | DLPFC 151509                       | 4788         | 2239        |
|                    | DLPFC 151510                       | 4595         | 2239        |
| Human 2            | DLPFC 151669                       | 3636         | 2253        |
|                    | DLPFC 151670                       | 3484         | 2253        |
|                    | DLPFC 151671                       | 4093         | 2253        |
|                    | DLPFC 151672                       | 3888         | 2253        |
| Human 3            | DLPFC 151673                       | 3611         | 3271        |
|                    | DLPFC 151674                       | 3635         | 3271        |
|                    | DLPFC 151675                       | 3566         | 3271        |
|                    | DLPFC 151676                       | 3431         | 3271        |
| Sagittal-Anterior  | Sagittal-Anterior section1 (SA-1)  | 2695         | 3310        |
|                    | Sagittal-Anterior section2 (SA-2)  | 2825         | 3310        |
| Sagittal-Posterior | Sagittal-Posterior section1 (SP-1) | 3355         | 3310        |
|                    | Sagittal-Posterior section2 (SP-2) | 3289         | 3310        |

Table 8: Model Performance on Human 1, Human 2, and Human 3 Datasets

| Model Category                         | Human 1              |                      |                      | Human 2              |                      |                      | Human 3              |                      |                      |
|----------------------------------------|----------------------|----------------------|----------------------|----------------------|----------------------|----------------------|----------------------|----------------------|----------------------|
|                                        | MSE ↓                | PCC ↑                | SCC ↑                | MSE ↓                | PCC ↑                | SCC ↑                | MSE ↓                | PCC ↑                | SCC ↑                |
| <b>Local Image-based</b>               |                      |                      |                      |                      |                      |                      |                      |                      |                      |
| ST-Net (Nat. B.E. He et al. (2020))    | 1.494 ± 0.048        | 0.033 ± 0.022        | 0.070 ± 0.011        | 1.348 ± 0.028        | 0.053 ± 0.023        | 0.086 ± 0.020        | 0.365 ± 0.068        | 0.123 ± 0.019        | 0.134 ± 0.045        |
| BLEEP (NeurIPS Xie et al. (2023))      | 1.551 ± 0.058        | 0.036 ± 0.003        | 0.037 ± 0.005        | 1.365 ± 0.067        | 0.058 ± 0.011        | 0.057 ± 0.013        | 1.067 ± 0.085        | 0.086 ± 0.007        | 0.077 ± 0.008        |
| <b>Graph-based Context</b>             |                      |                      |                      |                      |                      |                      |                      |                      |                      |
| EGN (PR Yang et al. (2024))            | 0.995 ± 0.053        | 0.051 ± 0.006        | 0.054 ± 0.005        | 1.008 ± 0.035        | 0.053 ± 0.006        | 0.066 ± 0.011        | 0.997 ± 0.074        | 0.103 ± 0.016        | 0.109 ± 0.014        |
| IGI-DL (Cell R.M. Gao et al. (2024))   | 0.205 ± 0.009        | 0.115 ± 0.008        | 0.117 ± 0.008        | 0.297 ± 0.023        | 0.155 ± 0.048        | 0.152 ± 0.048        | 0.284 ± 0.048        | 0.138 ± 0.036        | 0.124 ± 0.026        |
| <b>Transformer-based Context</b>       |                      |                      |                      |                      |                      |                      |                      |                      |                      |
| iStar (Nat. Biot. Zhang et al. (2024)) | 0.149 ± 0.050        | 0.191 ± 0.029        | 0.189 ± 0.016        | 0.194 ± 0.058        | 0.204 ± 0.016        | 0.229 ± 0.008        | 0.171 ± 0.036        | 0.236 ± 0.020        | 0.230 ± 0.018        |
| TRIPLEX (CVPR Chung et al. (2024))     | 0.181 ± 0.009        | 0.131 ± 0.007        | 0.125 ± 0.007        | 0.211 ± 0.006        | 0.194 ± 0.012        | 0.186 ± 0.013        | 0.179 ± 0.014        | 0.211 ± 0.020        | 0.199 ± 0.020        |
| M2ORT (AAAI Wang et al. (2025))        | 1.000 ± 0.003        | -0.001 ± 0.001       | 0.000 ± 0.002        | 1.006 ± 0.006        | -0.001 ± 0.001       | -0.000 ± 0.001       | 1.019 ± 0.010        | -0.000 ± 0.001       | -0.000 ± 0.002       |
| <b>Coordinate-based Generative</b>     |                      |                      |                      |                      |                      |                      |                      |                      |                      |
| STAGE (NAR Li et al. (2024))           | 0.259 ± 0.007        | 0.108 ± 0.013        | 0.105 ± 0.017        | 0.307 ± 0.018        | 0.139 ± 0.034        | 0.130 ± 0.029        | 0.339 ± 0.046        | 0.150 ± 0.016        | 0.149 ± 0.013        |
| STeVs (Ours)                           | <b>0.142 ± 0.008</b> | <b>0.215 ± 0.011</b> | <b>0.202 ± 0.008</b> | <b>0.188 ± 0.005</b> | <b>0.281 ± 0.005</b> | <b>0.271 ± 0.004</b> | <b>0.166 ± 0.014</b> | <b>0.296 ± 0.019</b> | <b>0.263 ± 0.020</b> |

Sagittal-Posterior. The experimental results clearly show that the STeVs model consistently outperformed all competing methods on both mouse brain datasets. This successful validation on datasets from a different species provides strong evidence for the STeVs model’s powerful generalization ability and its great potential for application as a general-purpose framework in diverse biological scenarios.

#### E.4 10X MOUSE BRAIN ON CROSS-SLICE EXPERIMENTS

In this section, we subject our model to the most rigorous test: a cross-slice generalization performance evaluation on the 10x Mouse Brain dataset. This task requires the model to transfer and apply knowledge learned from one brain region slice to another, completely unseen one, posing the ultimate challenge to its generalization and robustness. The experimental results in Table 11 once again unequivocally demonstrate the superior performance of STeVs. In this highly challenging scenario, STeVs not only far surpassed most baseline models, whose predictions were close to random, but also achieved a comprehensive and significant victory over the strongest competitor, iStar. This is especially evident in the prediction for the posterior (Sagittal-Posterior) slice, where STeVs’s PCC reached as high as 0.442, a substantial lead compared to iStar’s 0.363, fully reflecting its powerful predictive capability and generalization stability. Synthesizing the performance on both human and mouse datasets, these cross-slice experimental results ultimately establish the status of STeVs as a high-performance, cross-species applicable, and general-purpose framework for spatial gene expression prediction.

Table 9: Model Performance on Human 1, Human 2, and Human 3 Datasets

| Model Category                         | Human 1              |                      |                      | Human 2              |                      |                      | Human 3              |                      |                      |
|----------------------------------------|----------------------|----------------------|----------------------|----------------------|----------------------|----------------------|----------------------|----------------------|----------------------|
|                                        | MSE ↓                | PCC ↑                | SCC ↑                | MSE ↓                | PCC ↑                | SCC ↑                | MSE ↓                | PCC ↑                | SCC ↑                |
| <b>Local Image-based</b>               |                      |                      |                      |                      |                      |                      |                      |                      |                      |
| ST-Net (Nat. B.E. He et al. (2020))    | 1.471 ± 0.060        | 0.009 ± 0.019        | 0.062 ± 0.009        | 1.571 ± 0.054        | 0.008 ± 0.026        | 0.063 ± 0.019        | 1.283 ± 0.110        | 0.040 ± 0.069        | 0.043 ± 0.090        |
| BLEEP (NeurIPS Xie et al. (2023))      | 1.758 ± 0.084        | 0.029 ± 0.009        | 0.030 ± 0.011        | 1.274 ± 0.028        | 0.039 ± 0.018        | 0.036 ± 0.019        | 1.574 ± 0.105        | 0.039 ± 0.046        | 0.034 ± 0.039        |
| <b>Graph-based Context</b>             |                      |                      |                      |                      |                      |                      |                      |                      |                      |
| EGN (PR Yang et al. (2024))            | 0.905 ± 0.033        | 0.049 ± 0.005        | 0.056 ± 0.006        | 0.896 ± 0.022        | 0.052 ± 0.023        | 0.045 ± 0.033        | 0.937 ± 0.078        | 0.052 ± 0.050        | 0.052 ± 0.058        |
| IGI-DL (Cell R.M. Gao et al. (2024))   | 0.717 ± 0.070        | 0.059 ± 0.011        | 0.059 ± 0.010        | 1.859 ± 0.038        | 0.029 ± 0.038        | 0.030 ± 0.034        | 1.908 ± 0.041        | 0.008 ± 0.026        | 0.001 ± 0.030        |
| <b>Transformer-based Context</b>       |                      |                      |                      |                      |                      |                      |                      |                      |                      |
| iStar (Nat. Biot. Zhang et al. (2024)) | <u>0.262 ± 0.046</u> | <u>0.126 ± 0.018</u> | <u>0.136 ± 0.012</u> | <u>0.215 ± 0.053</u> | <u>0.105 ± 0.073</u> | <u>0.109 ± 0.088</u> | <u>0.319 ± 0.162</u> | <u>0.122 ± 0.095</u> | <u>0.118 ± 0.096</u> |
| TRIPLEX (CVPR Chung et al. (2024))     | 0.487 ± 0.009        | 0.097 ± 0.018        | 0.092 ± 0.016        | 0.566 ± 0.038        | 0.083 ± 0.086        | 0.083 ± 0.084        | 0.814 ± 0.037        | 0.071 ± 0.125        | 0.069 ± 0.117        |
| M2ORT (AAAI Wang et al. (2025))        | 1.205 ± 0.078        | 0.005 ± 0.007        | 0.005 ± 0.006        | 1.188 ± 0.035        | -0.004 ± 0.006       | -0.002 ± 0.004       | 1.106 ± 0.151        | -0.001 ± 0.003       | 0.001 ± 0.002        |
| <b>Coordinate-based Generative</b>     |                      |                      |                      |                      |                      |                      |                      |                      |                      |
| STAGE (NAR Li et al. (2024))           | 1.186 ± 0.018        | 0.044 ± 0.038        | 0.042 ± 0.036        | 0.921 ± 0.055        | 0.046 ± 0.045        | 0.047 ± 0.043        | 0.615 ± 0.518        | 0.074 ± 0.045        | 0.077 ± 0.048        |
| STeVs (Ours)                           | <b>0.145 ± 0.008</b> | <b>0.153 ± 0.018</b> | <b>0.152 ± 0.015</b> | <b>0.202 ± 0.036</b> | <b>0.167 ± 0.075</b> | <b>0.166 ± 0.071</b> | <b>0.174 ± 0.024</b> | <b>0.256 ± 0.032</b> | <b>0.231 ± 0.029</b> |

Table 10: Intra-slice Performance Comparison on 10x Mouse Brain Datasets

| Model Category                         | Sagittal-Anterior    |                      |                      | Sagittal-Posterior   |                      |                      |
|----------------------------------------|----------------------|----------------------|----------------------|----------------------|----------------------|----------------------|
|                                        | MSE ↓                | PCC ↑                | SCC ↑                | MSE ↓                | PCC ↑                | SCC ↑                |
| <b>Local Image-based</b>               |                      |                      |                      |                      |                      |                      |
| ST-Net (Nat. B.E. He et al. (2020))    | 0.896 ± 0.024        | 0.051 ± 0.005        | 0.066 ± 0.004        | 0.915 ± 0.006        | 0.043 ± 0.006        | 0.121 ± 0.018        |
| BLEEP (NeurIPS Xie et al. (2023))      | 0.772 ± 0.005        | 0.086 ± 0.013        | 0.087 ± 0.019        | 0.967 ± 0.057        | 0.123 ± 0.010        | 0.117 ± 0.009        |
| <b>Graph-based Context</b>             |                      |                      |                      |                      |                      |                      |
| EGN (PR Yang et al. (2024))            | 0.739 ± 0.043        | 0.084 ± 0.013        | 0.076 ± 0.015        | 1.087 ± 0.011        | 0.099 ± 0.008        | 0.107 ± 0.010        |
| IGI-DL (Cell R.M. Gao et al. (2024))   | 0.324 ± 0.068        | 0.239 ± 0.046        | 0.242 ± 0.051        | 0.584 ± 0.033        | 0.292 ± 0.004        | 0.264 ± 0.011        |
| <b>Transformer-based Context</b>       |                      |                      |                      |                      |                      |                      |
| iStar (Nat. Biot. Zhang et al. (2024)) | <u>0.254 ± 0.054</u> | <u>0.384 ± 0.025</u> | <u>0.375 ± 0.055</u> | <u>0.264 ± 0.103</u> | <u>0.459 ± 0.012</u> | <u>0.397 ± 0.011</u> |
| TRIPLEX (CVPR Chung et al. (2024))     | 0.372 ± 0.021        | 0.232 ± 0.018        | 0.216 ± 0.018        | 0.345 ± 0.006        | 0.315 ± 0.011        | 0.297 ± 0.006        |
| M2ORT (AAAI Wang et al. (2025))        | 1.008 ± 0.004        | 0.001 ± 0.001        | 0.001 ± 0.000        | 1.020 ± 0.023        | 0.001 ± 0.001        | 0.001 ± 0.000        |
| <b>Coordinate-based Generative</b>     |                      |                      |                      |                      |                      |                      |
| STAGE (NAR Li et al. (2024))           | 0.462 ± 0.067        | 0.104 ± 0.035        | 0.094 ± 0.039        | 0.502 ± 0.037        | 0.120 ± 0.048        | 0.123 ± 0.051        |
| STeVs (Ours)                           | <b>0.239 ± 0.015</b> | <b>0.413 ± 0.028</b> | <b>0.396 ± 0.040</b> | <b>0.208 ± 0.008</b> | <b>0.486 ± 0.008</b> | <b>0.423 ± 0.008</b> |

## F ABLATION STUDY DETAILS

To systematically validate the necessity of each core component within the STeVs model and to demonstrate the superiority of our design choices, we conducted a series of comprehensive ablation studies. We evaluated the impact on performance by removing or replacing the model’s key modules, with the results summarized in Table 12 and 14 (intra-slice) and Table 13 and 15 (cross-slice).

### F.1 CONTRIBUTION OF CORE COMPONENTS

The experimental results clearly reveal the contribution of each core component. Removing the **Spatial Encoder** (STeVs w/o Spatial Encoder) leads to a significant performance drop in the cross-slice task, which demonstrates that relying solely on a powerful visual feature extractor is insufficient; spatial coordinate information is crucial for capturing the macroscopic patterns of gene expression. Removing the **Latent Space Alignment Loss** (STeVs w/o Alignment Loss) has a minor impact on the simpler intra-slice task but leads to performance degradation in the cross-slice setting. This indicates that the alignment loss is effective for learning a slice-invariant spatial representation. Finally, removing the **Image Decoder** (STeVs w/o Image Decoder) causes a slight but consistent decrease in performance, proving that image reconstruction serves as an important auxiliary task and regularizer, compelling the encoder to learn more fine-grained visual representations.

### F.2 EFFECTIVENESS OF THE MULTIMODAL FUSION MECHANISM

Our probabilistic PoE fusion mechanism is significantly superior to other common fusion methods. **Simple Feature Concatenation** (STeVs (Concat)) and **Deterministic Mean Fusion** (STeVs (Deterministic)) perform far below our model, especially in the cross-slice task, as they cannot effectively handle the uncertainty and relative importance of different modalities. Interestingly, the more advanced **Cross-Attention** mechanism (STeVs (Cross-Attention)), while showing competitive performance on some intra-slice tasks, exhibits insufficient generalization ability with a noticeable performance drop in the cross-slice tasks. This, in turn, highlights the superiority of our PoE-based probabilistic fusion method in modeling uncertainty and enhancing generalization.

Table 11: Cross-slice Performance Comparison on 10x Mouse Brain Datasets

| Model Category                         | Sagittal-Anterior    |                      |                      | Sagittal-Posterior   |                      |                      |
|----------------------------------------|----------------------|----------------------|----------------------|----------------------|----------------------|----------------------|
|                                        | MSE ↓                | PCC ↑                | SCC ↑                | MSE ↓                | PCC ↑                | SCC ↑                |
| <b>Local Image-based</b>               |                      |                      |                      |                      |                      |                      |
| ST-Net (Nat. B.E. He et al. (2020))    | 1.861 ± 0.084        | 0.010 ± 0.008        | 0.052 ± 0.010        | 1.502 ± 0.020        | 0.071 ± 0.022        | 0.131 ± 0.002        |
| BLEEP (NeurIPS Xie et al. (2023))      | 1.436 ± 0.027        | 0.069 ± 0.003        | 0.067 ± 0.002        | 1.229 ± 0.009        | 0.118 ± 0.024        | 0.111 ± 0.024        |
| <b>Graph-based Context</b>             |                      |                      |                      |                      |                      |                      |
| EGN (PR Yang et al. (2024))            | 1.159 ± 0.055        | 0.084 ± 0.006        | 0.075 ± 0.004        | 0.825 ± 0.014        | 0.117 ± 0.000        | 0.130 ± 0.002        |
| IGI-DL (Cell R.M. Gao et al. (2024))   | 0.918 ± 0.071        | 0.089 ± 0.005        | 0.087 ± 0.007        | 0.924 ± 0.024        | 0.118 ± 0.037        | 0.126 ± 0.030        |
| <b>Transformer-based Context</b>       |                      |                      |                      |                      |                      |                      |
| iStar (Nat. Biot. Zhang et al. (2024)) | 0.273 ± 0.070        | 0.301 ± 0.014        | 0.300 ± 0.017        | 0.269 ± 0.105        | 0.363 ± 0.038        | 0.325 ± 0.030        |
| TRIPLEX (CVPR Chung et al. (2024))     | 0.438 ± 0.022        | 0.197 ± 0.010        | 0.180 ± 0.013        | 0.450 ± 0.008        | 0.256 ± 0.006        | 0.247 ± 0.006        |
| M2ORT (AAAI Wang et al. (2025))        | 1.133 ± 0.000        | 0.006 ± 0.002        | 0.007 ± 0.003        | 1.253 ± 0.145        | 0.001 ± 0.006        | 0.001 ± 0.005        |
| <b>Coordinate-based Generative</b>     |                      |                      |                      |                      |                      |                      |
| STAGE (NAR Li et al. (2024))           | 0.624 ± 0.028        | 0.125 ± 0.021        | 0.118 ± 0.019        | 0.631 ± 0.021        | 0.156 ± 0.028        | 0.158 ± 0.026        |
| STeVs (Ours)                           | <b>0.261 ± 0.011</b> | <b>0.362 ± 0.014</b> | <b>0.351 ± 0.018</b> | <b>0.223 ± 0.003</b> | <b>0.442 ± 0.000</b> | <b>0.392 ± 0.006</b> |

### F.3 CHOICE OF ENCODER ARCHITECTURES

Architectural comparisons validate the rationale of our choices. For the image encoder, the **Swin Transformer**, with its hierarchical structure, outperforms both a standard ViT and a traditional CNN. Furthermore, removing the **ImageNet pre-trained weights** (STeVs w/o Pretrained) leads to a substantial drop in performance, demonstrating the effectiveness of transfer learning. For the spatial encoder, we also explored more complex alternatives, including a **Gaussian Process** (STeVs (Gaussian Process)) and an **MLP with Fourier features** (STeVs (MLP w/ Fourier)). Although these variants perform adequately on the intra-slice task, their performance degrades severely in the cross-slice setting. This indicates that our simple MLP, when combined with our fusion and alignment strategy, provides a more robust and generalizable foundation.

In summary, this series of exhaustive ablation studies, spanning different species and task difficulties, systematically validates the necessity and advanced nature of each design element in the STeVs model, collectively forming the solid foundation for its accurate and robust predictions in diverse biological scenarios. Additionally, the decoder could be modified into a Transformer decoder to consider gene co-expression and potentially improve prediction performance Cui et al. (2024); however, this is beyond the scope of this paper’s focus on representation fusion.

Table 12: Intra-slice cross-validation Performance Comparison of STeVs Variants on DLPFC Datasets

| Model Variant                    | MSE ↓                | Human 1 PCC ↑        | SCC ↑                | MSE ↓                | Human 2 PCC ↑        | SCC ↑                | MSE ↓                | Human 3 PCC ↑        | SCC ↑                |
|----------------------------------|----------------------|----------------------|----------------------|----------------------|----------------------|----------------------|----------------------|----------------------|----------------------|
| <i>Component Ablation</i>        |                      |                      |                      |                      |                      |                      |                      |                      |                      |
| STeVs w/o Image Decoder          | 0.151 ± 0.010        | 0.203 ± 0.015        | 0.195 ± 0.016        | 0.192 ± 0.012        | 0.274 ± 0.018        | 0.260 ± 0.019        | 0.176 ± 0.018        | 0.283 ± 0.021        | 0.253 ± 0.023        |
| STeVs w/o Spatial Encoder        | 0.171 ± 0.025        | 0.172 ± 0.021        | 0.162 ± 0.022        | 0.226 ± 0.031        | 0.225 ± 0.025        | 0.217 ± 0.026        | 0.199 ± 0.032        | 0.237 ± 0.028        | 0.210 ± 0.030        |
| STeVs w/o Alignment Loss         | 0.147 ± 0.009        | 0.209 ± 0.012        | 0.200 ± 0.013        | 0.188 ± 0.010        | 0.280 ± 0.015        | 0.266 ± 0.016        | 0.172 ± 0.015        | 0.289 ± 0.019        | 0.261 ± 0.020        |
| <i>Fusion Mechanism Ablation</i> |                      |                      |                      |                      |                      |                      |                      |                      |                      |
| STeVs (Concat)                   | 0.171 ± 0.018        | 0.191 ± 0.017        | 0.179 ± 0.019        | 0.226 ± 0.021        | 0.243 ± 0.024        | 0.239 ± 0.025        | 0.201 ± 0.022        | 0.260 ± 0.027        | 0.222 ± 0.028        |
| STeVs (Deterministic)            | 0.184 ± 0.015        | 0.179 ± 0.014        | 0.177 ± 0.015        | 0.241 ± 0.018        | 0.234 ± 0.020        | 0.231 ± 0.021        | 0.213 ± 0.019        | 0.251 ± 0.023        | 0.215 ± 0.024        |
| STeVs (Cross-Attention)          | 0.143 ± 0.014        | 0.213 ± 0.019        | 0.201 ± 0.018        | 0.187 ± 0.015        | 0.283 ± 0.021        | 0.273 ± 0.020        | 0.167 ± 0.021        | 0.294 ± 0.026        | 0.261 ± 0.027        |
| <i>Spatial Encoder Variants</i>  |                      |                      |                      |                      |                      |                      |                      |                      |                      |
| STeVs (Gaussian Process)         | 0.144 ± 0.010        | 0.212 ± 0.013        | 0.200 ± 0.014        | 0.189 ± 0.011        | 0.279 ± 0.016        | 0.269 ± 0.017        | 0.168 ± 0.016        | 0.293 ± 0.020        | 0.260 ± 0.021        |
| STeVs (MLP w/ Fourier)           | 0.145 ± 0.011        | 0.210 ± 0.014        | 0.198 ± 0.015        | 0.191 ± 0.012        | 0.276 ± 0.017        | 0.265 ± 0.018        | 0.170 ± 0.017        | 0.290 ± 0.021        | 0.258 ± 0.022        |
| <i>Architecture Variants</i>     |                      |                      |                      |                      |                      |                      |                      |                      |                      |
| STeVs (Convolutional)            | 0.217 ± 0.022        | 0.163 ± 0.018        | 0.162 ± 0.019        | 0.259 ± 0.026        | 0.215 ± 0.028        | 0.203 ± 0.029        | 0.246 ± 0.028        | 0.224 ± 0.031        | 0.203 ± 0.033        |
| STeVs (ViT)                      | 0.149 ± 0.012        | 0.210 ± 0.015        | 0.194 ± 0.014        | 0.199 ± 0.015        | 0.271 ± 0.018        | 0.266 ± 0.017        | 0.176 ± 0.018        | 0.290 ± 0.023        | 0.252 ± 0.025        |
| STeVs w/o Pretrained             | 0.191 ± 0.026        | 0.176 ± 0.025        | 0.173 ± 0.024        | 0.243 ± 0.030        | 0.231 ± 0.033        | 0.218 ± 0.032        | 0.223 ± 0.033        | 0.239 ± 0.037        | 0.213 ± 0.036        |
| <b>STeVs (Ours)</b>              | <b>0.142 ± 0.013</b> | <b>0.215 ± 0.018</b> | <b>0.202 ± 0.017</b> | <b>0.188 ± 0.014</b> | <b>0.281 ± 0.020</b> | <b>0.271 ± 0.019</b> | <b>0.166 ± 0.020</b> | <b>0.296 ± 0.025</b> | <b>0.263 ± 0.026</b> |

## G GENE EXPRESSION VISUALIZATION FOR EACH DATASET

This appendix section provides supplementary visualizations for the gene expression prediction performance of STeVs and all baseline models, corresponding to the results discussed in the main manuscript. The following figures are organized by the two core validation strategies.

**Intra-Slice Validation** Figures 8-12 display the qualitative results for the intra-slice validation task. For these experiments, models were evaluated on a 20% held-out test set from within each individual slice. Visualizations are shown for representative spatially variable genes: OLFM1 Shen

Table 13: Cross-slice cross-validation Performance Comparison of STeVs Variants on DLPFC Datasets

| Model Variant                    | MSE ↓                | Human 1 PCC ↑        | SCC ↑                | MSE ↓                | Human 2 PCC ↑        | SCC ↑                | MSE ↓                | Human 3 PCC ↑        | SCC ↑                |
|----------------------------------|----------------------|----------------------|----------------------|----------------------|----------------------|----------------------|----------------------|----------------------|----------------------|
| <i>Component Ablation</i>        |                      |                      |                      |                      |                      |                      |                      |                      |                      |
| STeVs w/o Image Decoder          | 0.160 ± 0.018        | 0.143 ± 0.025        | 0.138 ± 0.024        | 0.227 ± 0.035        | 0.148 ± 0.041        | 0.150 ± 0.040        | 0.196 ± 0.033        | 0.233 ± 0.040        | 0.203 ± 0.038        |
| STeVs w/o Spatial Encoder        | 0.350 ± 0.031        | 0.103 ± 0.015        | 0.113 ± 0.016        | 0.324 ± 0.033        | 0.144 ± 0.020        | 0.137 ± 0.021        | 0.357 ± 0.038        | 0.156 ± 0.023        | 0.153 ± 0.024        |
| STeVs w/o Alignment Loss         | 0.158 ± 0.017        | 0.145 ± 0.024        | 0.142 ± 0.023        | 0.225 ± 0.036        | 0.150 ± 0.042        | 0.148 ± 0.041        | 0.195 ± 0.032        | 0.235 ± 0.039        | 0.205 ± 0.037        |
| <i>Fusion Mechanism Ablation</i> |                      |                      |                      |                      |                      |                      |                      |                      |                      |
| STeVs (Concat)                   | 0.211 ± 0.022        | 0.117 ± 0.019        | 0.110 ± 0.018        | 0.290 ± 0.029        | 0.122 ± 0.025        | 0.122 ± 0.026        | 0.252 ± 0.031        | 0.190 ± 0.028        | 0.165 ± 0.027        |
| STeVs (Deterministic)            | 0.233 ± 0.019        | 0.107 ± 0.016        | 0.108 ± 0.017        | 0.303 ± 0.024        | 0.120 ± 0.022        | 0.111 ± 0.023        | 0.278 ± 0.026        | 0.173 ± 0.025        | 0.157 ± 0.024        |
| STeVs (Cross-Attention)          | 0.155 ± 0.020        | 0.148 ± 0.027        | 0.145 ± 0.026        | 0.242 ± 0.038        | 0.134 ± 0.044        | 0.133 ± 0.043        | 0.255 ± 0.041        | 0.128 ± 0.045        | 0.120 ± 0.046        |
| <i>Spatial Encoder Variants</i>  |                      |                      |                      |                      |                      |                      |                      |                      |                      |
| STeVs (Gaussian Process)         | 0.345 ± 0.030        | 0.108 ± 0.016        | 0.117 ± 0.017        | 0.318 ± 0.032        | 0.149 ± 0.021        | 0.141 ± 0.022        | 0.352 ± 0.037        | 0.160 ± 0.024        | 0.156 ± 0.025        |
| STeVs (MLP w/ Fourier)           | 0.341 ± 0.029        | 0.112 ± 0.017        | 0.120 ± 0.018        | 0.315 ± 0.031        | 0.152 ± 0.022        | 0.145 ± 0.023        | 0.349 ± 0.036        | 0.163 ± 0.025        | 0.159 ± 0.026        |
| <i>Architecture Variants</i>     |                      |                      |                      |                      |                      |                      |                      |                      |                      |
| STeVs (Convolutional)            | 0.298 ± 0.032        | 0.089 ± 0.014        | 0.090 ± 0.013        | 0.362 ± 0.038        | 0.104 ± 0.018        | 0.095 ± 0.019        | 0.343 ± 0.040        | 0.132 ± 0.021        | 0.124 ± 0.022        |
| STeVs (ViT)                      | 0.166 ± 0.019        | 0.140 ± 0.026        | 0.134 ± 0.025        | 0.237 ± 0.037        | 0.145 ± 0.043        | 0.147 ± 0.042        | 0.201 ± 0.034        | 0.229 ± 0.041        | 0.200 ± 0.039        |
| STeVs w/o Pretrained             | 0.254 ± 0.036        | 0.099 ± 0.035        | 0.101 ± 0.034        | 0.319 ± 0.041        | 0.112 ± 0.048        | 0.104 ± 0.047        | 0.300 ± 0.046        | 0.159 ± 0.053        | 0.147 ± 0.052        |
| <b>STeVs (Ours)</b>              | <b>0.145 ± 0.021</b> | <b>0.153 ± 0.028</b> | <b>0.152 ± 0.027</b> | <b>0.202 ± 0.040</b> | <b>0.167 ± 0.045</b> | <b>0.166 ± 0.044</b> | <b>0.174 ± 0.038</b> | <b>0.256 ± 0.042</b> | <b>0.231 ± 0.040</b> |

Table 14: Intra-slice cross-validation Performance Comparison of STeVs Variants on 10x Mouse Brain Datasets

| Model Variant                    | MSE ↓                | Sagittal-Anterior PCC ↑ | SCC ↑                | MSE ↓                | Sagittal-Posterior PCC ↑ | SCC ↑                |
|----------------------------------|----------------------|-------------------------|----------------------|----------------------|--------------------------|----------------------|
| <i>Component Ablation</i>        |                      |                         |                      |                      |                          |                      |
| STeVs w/o Image Decoder          | 0.249 ± 0.018        | 0.403 ± 0.028           | 0.387 ± 0.030        | 0.215 ± 0.013        | 0.473 ± 0.016            | 0.415 ± 0.015        |
| STeVs w/o Spatial Encoder        | 0.330 ± 0.024        | 0.317 ± 0.021           | 0.287 ± 0.022        | 0.250 ± 0.020        | 0.389 ± 0.018            | 0.338 ± 0.019        |
| STeVs w/o Alignment Loss         | 0.241 ± 0.017        | 0.411 ± 0.027           | 0.390 ± 0.029        | 0.213 ± 0.012        | 0.479 ± 0.015            | 0.421 ± 0.014        |
| <i>Fusion Mechanism Ablation</i> |                      |                         |                      |                      |                          |                      |
| STeVs (Concat)                   | 0.353 ± 0.025        | 0.300 ± 0.022           | 0.362 ± 0.026        | 0.262 ± 0.021        | 0.428 ± 0.023            | 0.373 ± 0.022        |
| STeVs (Deterministic)            | 0.353 ± 0.020        | 0.336 ± 0.019           | 0.310 ± 0.020        | 0.281 ± 0.017        | 0.411 ± 0.019            | 0.363 ± 0.018        |
| STeVs (Cross-Attention)          | 0.240 ± 0.022        | 0.411 ± 0.033           | 0.394 ± 0.034        | 0.206 ± 0.017        | 0.488 ± 0.021            | 0.425 ± 0.020        |
| <i>Spatial Encoder Variants</i>  |                      |                         |                      |                      |                          |                      |
| STeVs (Gaussian Process)         | 0.240 ± 0.016        | 0.410 ± 0.026           | 0.393 ± 0.028        | 0.209 ± 0.011        | 0.483 ± 0.014            | 0.420 ± 0.013        |
| STeVs (MLP w/ Fourier)           | 0.238 ± 0.016        | 0.415 ± 0.027           | 0.399 ± 0.029        | 0.211 ± 0.012        | 0.480 ± 0.015            | 0.417 ± 0.014        |
| <i>Architecture Variants</i>     |                      |                         |                      |                      |                          |                      |
| STeVs (Convolutional)            | 0.351 ± 0.028        | 0.307 ± 0.025           | 0.322 ± 0.027        | 0.332 ± 0.025        | 0.382 ± 0.026            | 0.313 ± 0.024        |
| STeVs (ViT)                      | 0.251 ± 0.019        | 0.403 ± 0.029           | 0.391 ± 0.031        | 0.217 ± 0.014        | 0.476 ± 0.017            | 0.414 ± 0.016        |
| STeVs w/o Pretrained             | 0.329 ± 0.034        | 0.347 ± 0.036           | 0.318 ± 0.035        | 0.290 ± 0.031        | 0.403 ± 0.033            | 0.357 ± 0.032        |
| <b>STeVs (Ours)</b>              | <b>0.239 ± 0.021</b> | <b>0.413 ± 0.032</b>    | <b>0.396 ± 0.033</b> | <b>0.208 ± 0.016</b> | <b>0.486 ± 0.020</b>     | <b>0.423 ± 0.019</b> |

Table 15: Cross-slice cross-validation Performance Comparison of STeVs Variants on 10x Mouse Brain Datasets

| Model Variant                    | MSE ↓                | Sagittal-Anterior PCC ↑ | SCC ↑                | MSE ↓                | Sagittal-Posterior PCC ↑ | SCC ↑                |
|----------------------------------|----------------------|-------------------------|----------------------|----------------------|--------------------------|----------------------|
| <i>Component Ablation</i>        |                      |                         |                      |                      |                          |                      |
| STeVs w/o Image Decoder          | 0.291 ± 0.026        | 0.327 ± 0.029           | 0.309 ± 0.030        | 0.252 ± 0.020        | 0.403 ± 0.021            | 0.356 ± 0.022        |
| STeVs w/o Spatial Encoder        | 0.433 ± 0.035        | 0.212 ± 0.024           | 0.209 ± 0.025        | 0.351 ± 0.031        | 0.280 ± 0.026            | 0.263 ± 0.027        |
| STeVs w/o Alignment Loss         | 0.285 ± 0.027        | 0.331 ± 0.030           | 0.315 ± 0.031        | 0.249 ± 0.021        | 0.408 ± 0.022            | 0.360 ± 0.023        |
| <i>Fusion Mechanism Ablation</i> |                      |                         |                      |                      |                          |                      |
| STeVs (Concat)                   | 0.372 ± 0.031        | 0.266 ± 0.028           | 0.261 ± 0.029        | 0.319 ± 0.026        | 0.356 ± 0.027            | 0.308 ± 0.028        |
| STeVs (Deterministic)            | 0.353 ± 0.027        | 0.251 ± 0.025           | 0.230 ± 0.026        | 0.347 ± 0.024        | 0.337 ± 0.025            | 0.400 ± 0.026        |
| STeVs (Cross-Attention)          | 0.313 ± 0.030        | 0.290 ± 0.028           | 0.280 ± 0.029        | 0.268 ± 0.024        | 0.354 ± 0.026            | 0.314 ± 0.027        |
| <i>Spatial Encoder Variants</i>  |                      |                         |                      |                      |                          |                      |
| STeVs (Gaussian Process)         | 0.425 ± 0.034        | 0.218 ± 0.023           | 0.214 ± 0.024        | 0.345 ± 0.030        | 0.287 ± 0.025            | 0.270 ± 0.026        |
| STeVs (MLP w/ Fourier)           | 0.421 ± 0.033        | 0.223 ± 0.024           | 0.219 ± 0.025        | 0.340 ± 0.029        | 0.291 ± 0.026            | 0.275 ± 0.027        |
| <i>Architecture Variants</i>     |                      |                         |                      |                      |                          |                      |
| STeVs (Convolutional)            | 0.450 ± 0.041        | 0.207 ± 0.031           | 0.196 ± 0.033        | 0.410 ± 0.038        | 0.279 ± 0.029            | 0.257 ± 0.030        |
| STeVs (ViT)                      | 0.318 ± 0.029        | 0.301 ± 0.027           | 0.309 ± 0.028        | 0.261 ± 0.023        | 0.394 ± 0.020            | 0.356 ± 0.022        |
| STeVs w/o Pretrained             | 0.413 ± 0.052        | 0.237 ± 0.043           | 0.226 ± 0.044        | 0.370 ± 0.040        | 0.319 ± 0.036            | 0.286 ± 0.037        |
| <b>STeVs (Ours)</b>              | <b>0.261 ± 0.033</b> | <b>0.362 ± 0.035</b>    | <b>0.350 ± 0.036</b> | <b>0.223 ± 0.028</b> | <b>0.442 ± 0.030</b>     | <b>0.392 ± 0.029</b> |

et al. (2025) for the human1, human2, and human3 datasets, and Dgkz Ishisaka & Hara (2014) for the anterior and posterior datasets.

**Cross-Slice Validation** Figures 13 to 19 present the results for the more challenging cross-slice validation task. A model is trained on a single slice from a group (e.g., D151507) and evaluated on all other unseen slices from the same group. These figures visually demonstrate the robust generalization capability of our model in contrast to the baseline methods.

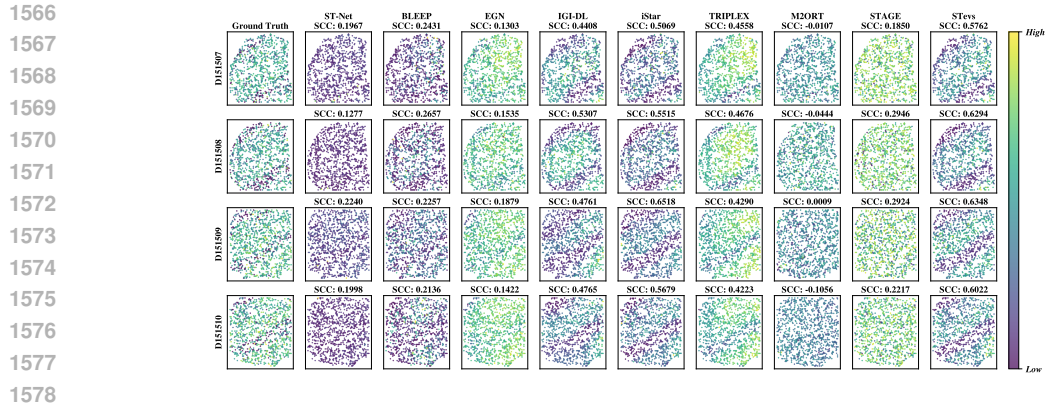

Figure 8: The results of intra-slice validation for the OLFM1 gene on 4 datasets of human1 (with a 20% test set)

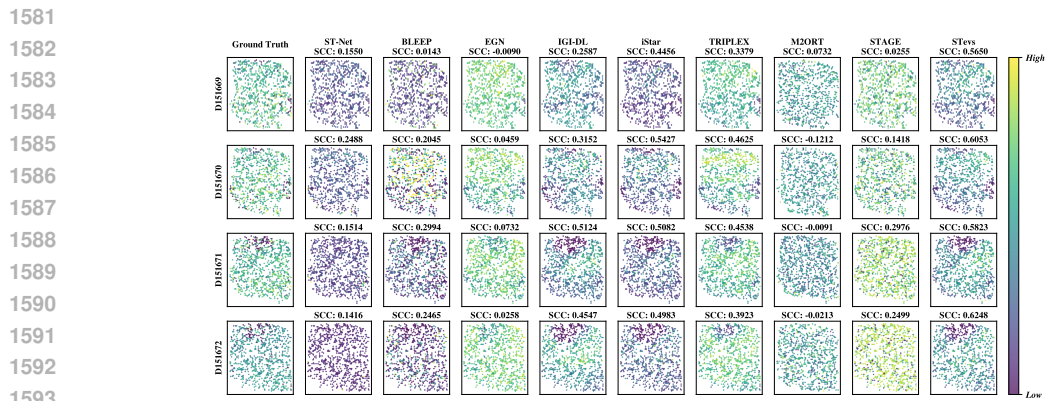

Figure 9: The results of intra-slice validation for the OLFM1 gene on 4 datasets of human2 (with a 20% test set)

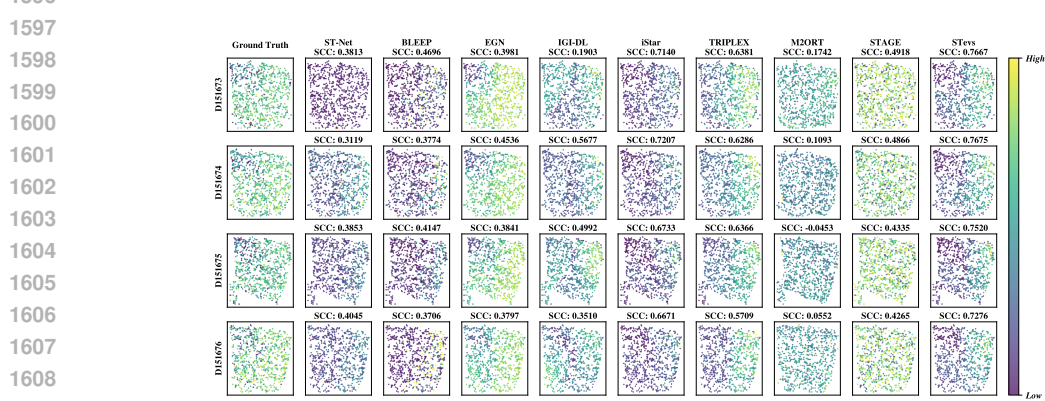

Figure 10: The results of intra-slice validation for the OLFM1 gene on 4 datasets of human3 (with a 20% test set)

## H ACCURATE RECOVERY OF SPATIAL DOMAINS

To evaluate whether the gene expression profiles predicted by our model can accurately recover the spatial domains of the tissue, we performed clustering analyses MacQueen (1967) on the expression profiles generated by each method after cross-slice training, and calculated the ARI against the manually annotated ground-truth domains. As summarized in Table 16, STeVs demonstrates superior performance across all five dataset groups. Notably, the ARI score from clustering on STeVs’s

1620  
1621  
1622  
1623  
1624  
1625  
1626

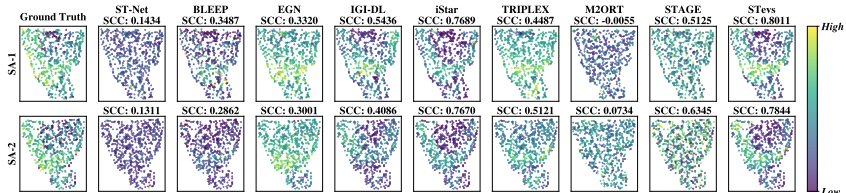

Figure 11: The results of intra-slice validation for the Dgkz gene on 2 datasets of anterior (with a 20% test set)

1631  
1632  
1633  
1634  
1635  
1636  
1637

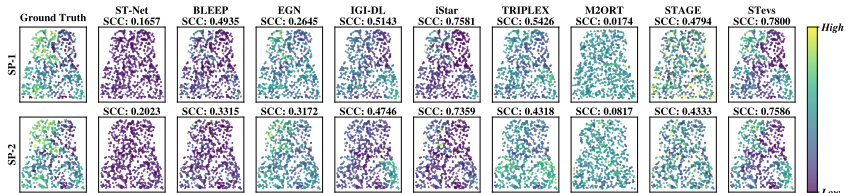

Figure 12: The results of intra-slice validation for the Dgkz gene on 2 datasets of posterior (with a 20% test set)

1641  
1642  
1643  
1644  
1645  
1646  
1647

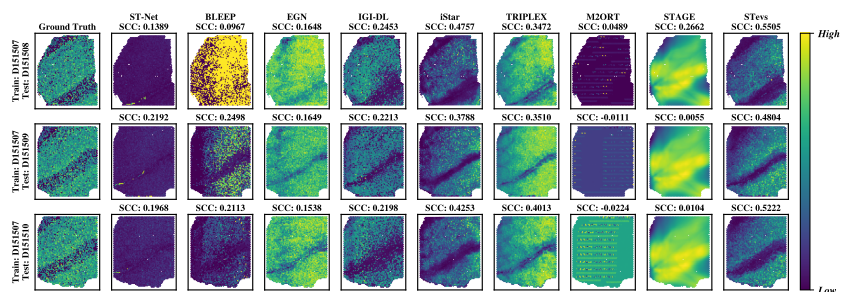

Figure 13: The cross-slice validation results of the OLFM1 gene on the other 3 slices of human1, with D151507 used as the training set

1656  
1657  
1658  
1659  
1660  
1661

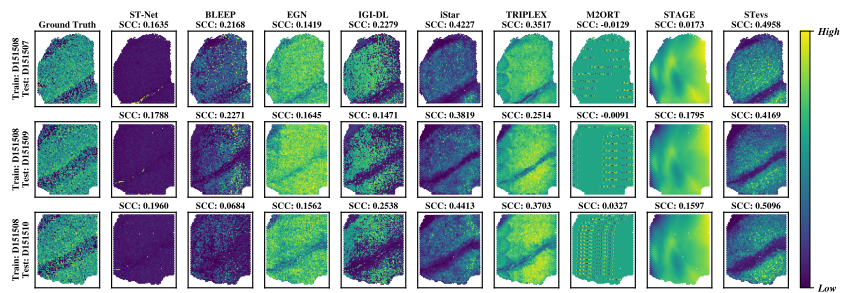

Figure 14: The cross-slice validation results of the OLFM1 gene on the other 3 slices of human1, with D151508 used as the training set

1666  
1667  
1668  
1669  
1670  
1671  
1672  
1673

predictions not only significantly surpasses that of other advanced predictive models like iStar, but also consistently outperforms the baseline results from clustering on the original ground-truth RNA counts. This suggests that the predictions from STeVs may serve a denoising function Eraslan et al. (2019), capturing the essential biological structures more clearly than the potentially noisy raw data, thereby enabling a more accurate recovery of the tissue’s spatial domains.

1674  
1675  
1676  
1677  
1678  
1679  
1680  
1681  
1682  
1683

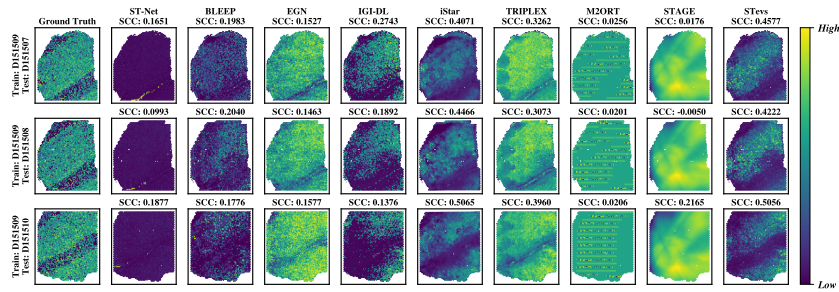

Figure 15: The cross-slice validation results of the OLFM1 gene on the other 3 slices of human1, with D151509 used as the training set

1684  
1685  
1686  
1687  
1688  
1689  
1690  
1691  
1692  
1693  
1694  
1695  
1696  
1697

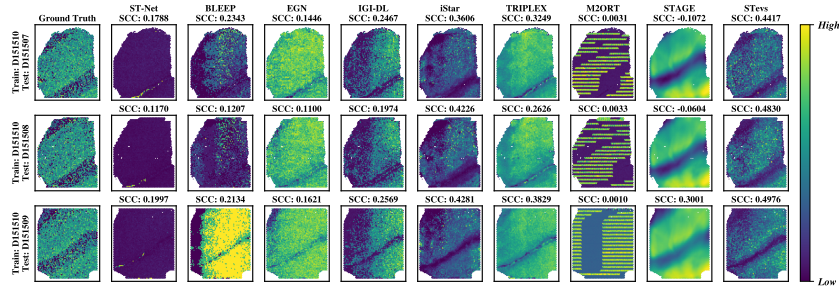

Figure 16: The cross-slice validation results of the OLFM1 gene on the other 3 slices of human1, with D151510 used as the training set

1700  
1701  
1702  
1703  
1704  
1705  
1706  
1707  
1708  
1709  
1710

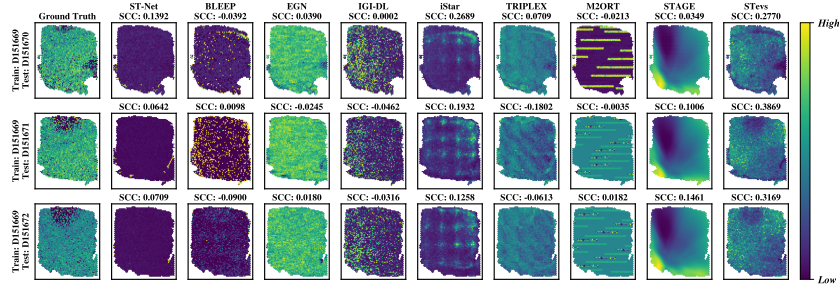

Figure 17: The cross-slice validation results of the OLFM1 gene on the other 3 slices of human2, with D151669 used as the training set

1711  
1712  
1713  
1714  
1715  
1716  
1717

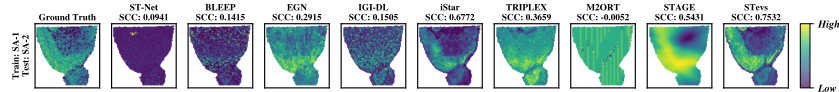

Figure 18: The cross-slice validation results of the Dgkz gene on the other 2 slices of anterior, with SA-1 used as the training set

## 1722 I PARAMETER SENSITIVITY ANALYSIS

1723  
1724 As shown in the Figure 20, we conducted a sensitivity analysis on three key hyperparameters: latent  
1725 dimension, learning rate, and KLD loss weight. The model's performance is relatively sensitive to  
1726 the choice of learning rate, while showing some, but not particularly high, sensitivity to the latent  
1727 dimension and KLD loss weight. The parameters achieve optimal performance within a specific  
range.

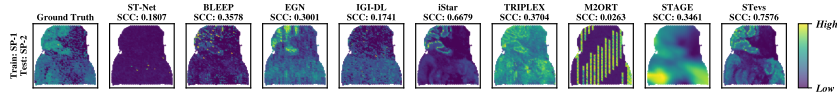

Figure 19: The cross-slice validation results of the Dgkz gene on the other 2 slices of posterior, with SP-1 used as the training set

Table 16: ARI Comparison across different methods and datasets

| Method      | DLPFC Dataset        |                      |                      | 10x Mouse Brain Dataset |                      |
|-------------|----------------------|----------------------|----------------------|-------------------------|----------------------|
|             | Human 1              | Human 2              | Human 3              | Sagittal-Anterior       | Sagittal-Posterior   |
| RNA Counts  | 0.139 ± 0.032        | 0.113 ± 0.014        | 0.176 ± 0.009        | 0.067 ± 0.001           | 0.053 ± 0.001        |
| STeVs(Ours) | <b>0.246 ± 0.040</b> | <b>0.238 ± 0.069</b> | <b>0.238 ± 0.051</b> | <b>0.280 ± 0.002</b>    | <b>0.295 ± 0.018</b> |
| iStar       | 0.214 ± 0.037        | 0.071 ± 0.063        | 0.172 ± 0.075        | 0.241 ± 0.016           | 0.221 ± 0.006        |
| TRIPLEX     | 0.080 ± 0.024        | 0.018 ± 0.016        | 0.123 ± 0.036        | 0.098 ± 0.004           | 0.107 ± 0.009        |

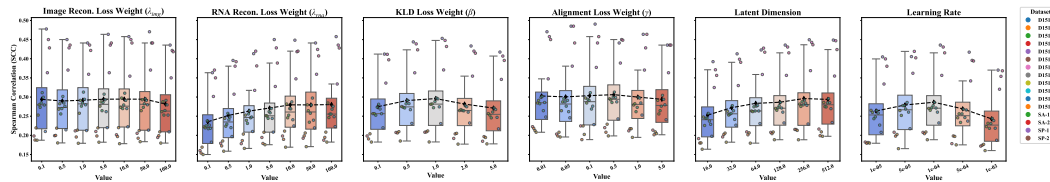

Figure 20: Parameter Sensitivity Analysis

## J EXTENDED EXPERIMENT

### J.1 ROBUSTNESS EXPERIMENTS

#### J.1.1 METHODOLOGY

To comprehensively evaluate the robustness of our model, particularly its ability to handle color variations arising from different experimental batches or staining procedures, we designed and conducted a color augmentation simulation. We selected the H&E images from the D151673 and D151674 datasets and applied a **Spectral Blue Shift** transformation. This transformation is controlled by an intensity parameter,  $\alpha$ , which we varied from 0.1 to 1.0 in increments of 0.1, thereby generating a series of images with a progressively blueish hue. The key advantage of this method is its ability to induce a global spectral shift across the image without altering the microscopic cellular histology or macroscopic tissue structure, thus effectively simulating inter-slice color variations (i.e., batch effects).

The specific operation of this transformation on any given pixel color value, represented as  $P = [R, G, B]^T$  (normalized to the range  $[0, 1]$ ), is defined by the following mathematical formula:

$$P_{\text{shifted}} = \text{clip}_{[0,255]} \left( \begin{bmatrix} R \\ G \\ B \end{bmatrix} + 255 * \begin{bmatrix} -\alpha \\ -\alpha \\ +\alpha \end{bmatrix} \right) \quad (40)$$

where  $P_{\text{shifted}}$  is the transformed pixel value and  $\alpha$  is the parameter controlling the intensity of the color shift.

#### J.1.2 RESULTS

We tested the model on the images processed with varying intensities of the Spectral Blue Shift and recorded its performance. The experimental results, as illustrated in Figure 21, clearly show the trend of the model’s performance as a function of the color shift intensity ( $\alpha$ ). As observed in the figure, the performance of all models exhibited a decline with increasing spectral distortion. However, our proposed model demonstrated superior robustness. Compared to the baseline methods,

1782  
1783  
1784  
1785  
1786  
1787  
1788  
1789  
1790  
1791  
1792  
1793  
1794  
1795  
1796  
1797  
1798  
1799  
1800  
1801  
1802  
1803  
1804  
1805  
1806  
1807  
1808  
1809  
1810  
1811  
1812  
1813  
1814  
1815  
1816  
1817  
1818  
1819  
1820  
1821  
1822  
1823  
1824  
1825  
1826  
1827  
1828  
1829  
1830  
1831  
1832  
1833  
1834  
1835

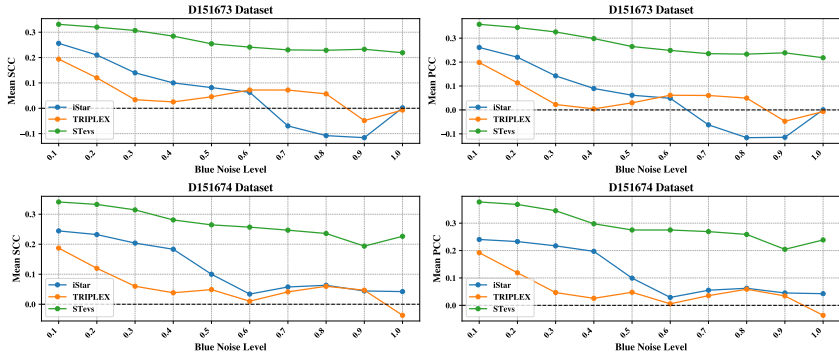

Figure 21: H&E stained images of the datasets used in the additional experiments. (Top row) Three HBC samples from a public dataset. (Bottom row) Three technical replicate samples of HSC from Ji et al. (2020).

our model’s performance degradation curve was considerably flatter, with its advantages becoming more pronounced at higher intensity levels (e.g.,  $\alpha > 0.5$ ). This result strongly demonstrates that our model is insensitive to color variations in H&E images.

J.2 EXTENDED DATASET EXPERIMENT

J.2.1 DATASET

The first group of datasets consists of three Human Breast Cancer (HBC) Wu et al. (2021) samples, sourced from a publicly available Visium dataset. Breast cancer serves as a classic model for studying the heterogeneity of the Tumor Microenvironment (TME), as its tissue sections contain multiple cell types—including tumor, stromal, and infiltrating immune cells—that present a complex spatial architecture, making it highly suitable for evaluating the foundational generalization performance of a model. The second group is from a study on Human Squamous Cell Carcinoma (HSC) published by Ji et al. (2020), which is renowned for its high-quality multimodal data. From this, we selected three technical replicate sections from Patient 10. This provides an ideal validation scenario to rigorously test our model’s stability and consistency when processing technical replicates from the same source tissue. The third group is derived from a MISAR-seq (Microfluidic Indexing-based Spatial Assay for Transposase-Accessible Chromatin and RNA-sequencing) Jiang et al. (2023) dataset, chosen to evaluate the model’s capability in handling complex spatiotemporal and multi-omics data. This advanced dataset simultaneously provides spatial transcriptomics and spatial chromatin accessibility information from the same tissue section. We utilized data from different individuals at distinct developmental time points (E15 and E18) to challenge the model’s robustness against biological variability. During the data preprocessing stage, we performed Spatially Variable Gene (SVG) filtering on each dataset. For the HBC dataset, a final set of 851 high-confidence SVGs was retained for subsequent experiments. Similarly, for the HSC dataset, we obtained 1483 SVGs. For the MISAR-seq dataset, a total of 678 SVGs were selected for subsequent experiments. The style of the sections for all datasets is illustrated in Figure 22.

Table 17: Intra-slice Performance comparison of different models on the HBC, HSC, and MISAR datasets.

| Method              | HBC                    |                        |                        | HSC                    |                        |                        | MISAR                  |                        |                        |
|---------------------|------------------------|------------------------|------------------------|------------------------|------------------------|------------------------|------------------------|------------------------|------------------------|
|                     | MSE ↓                  | PCC ↑                  | SCC ↑                  | MSE ↓                  | PCC ↑                  | SCC ↑                  | MSE ↓                  | PCC ↑                  | SCC ↑                  |
| IGI-DL              | 0.8055 ± 0.4531        | 0.1269 ± 0.0957        | 0.1284 ± 0.0761        | 0.7310 ± 0.8815        | 0.1724 ± 0.0674        | 0.1349 ± 0.0675        | 0.9542 ± 0.2588        | 0.1150 ± 0.0880        | 0.1090 ± 0.0813        |
| iStar               | 0.3804 ± 0.1322        | 0.3001 ± 0.0652        | 0.2441 ± 0.0680        | 0.8981 ± 0.4588        | 0.5789 ± 0.0420        | 0.4058 ± 0.0354        | 0.4958 ± 0.5120        | 0.3787 ± 0.0450        | 0.3595 ± 0.0411        |
| TRIPLEX             | 0.2100 ± 0.0216        | 0.2390 ± 0.0720        | 0.2290 ± 0.0701        | 0.3070 ± 0.0901        | 0.3597 ± 0.0526        | 0.2884 ± 0.0251        | 0.5982 ± 0.1105        | 0.2591 ± 0.0615        | 0.2513 ± 0.0588        |
| <b>STeVs (Ours)</b> | <b>0.1559 ± 0.0162</b> | <b>0.3802 ± 0.0672</b> | <b>0.3125 ± 0.0598</b> | <b>0.1855 ± 0.0487</b> | <b>0.5951 ± 0.0313</b> | <b>0.4350 ± 0.0374</b> | <b>0.3988 ± 0.0415</b> | <b>0.3986 ± 0.0391</b> | <b>0.3866 ± 0.0352</b> |

J.2.2 RESULTS

The detailed experimental results are presented in Table 17 (for the intra-slice task) and Table 18 (for the cross-slice task), demonstrating the superior performance of our model. In both prediction

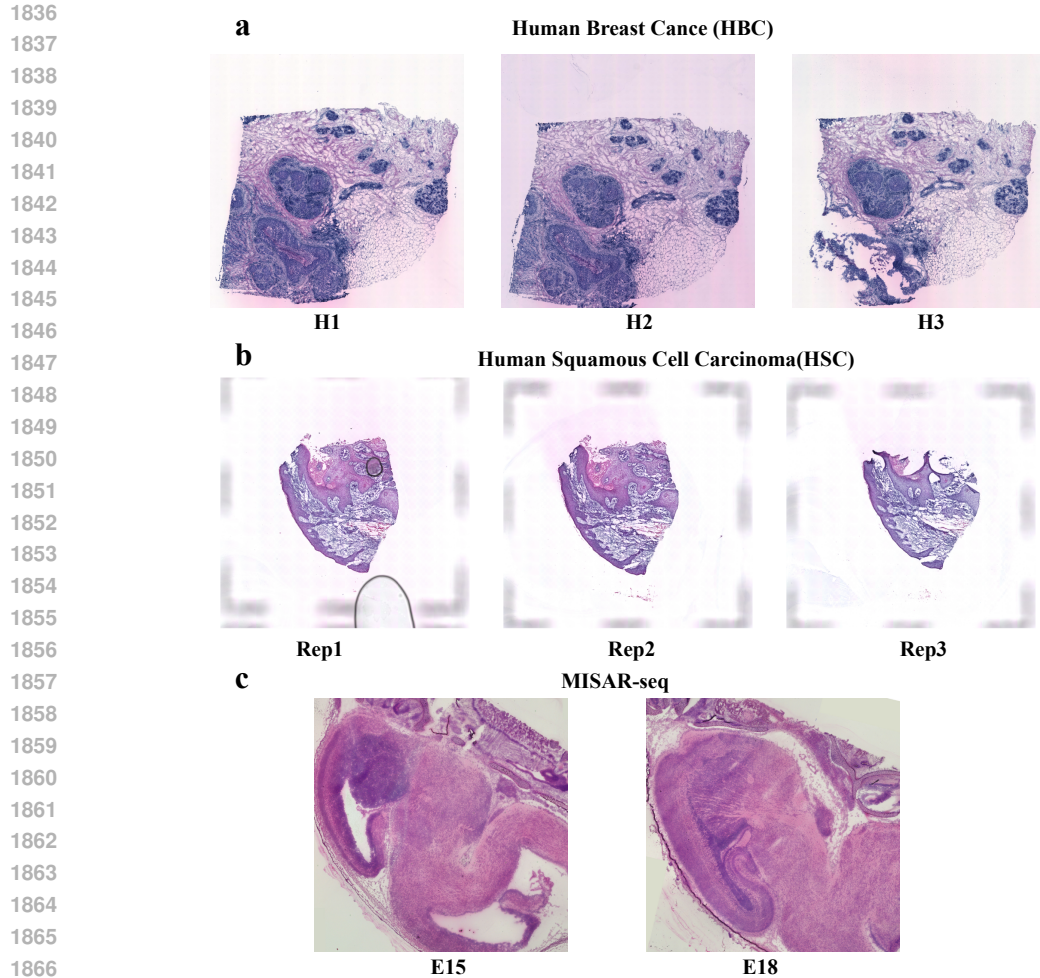

1868 Figure 22: H&E stained images of the datasets used in the additional experiments. (Top row) Three  
1869 HBC samples from a public dataset. (Bottom row) Three technical replicate samples of HSC from  
1870 Ji et al. (2020).  
1871

1872  
1873 Table 18: Cross-slice Performance comparison of different models on the HBC, HSC, and MISAR  
1874 datasets.

1875

| Method              | HBC                    |                        |                        | HSC                    |                        |                        | MISAR                  |                        |                        |
|---------------------|------------------------|------------------------|------------------------|------------------------|------------------------|------------------------|------------------------|------------------------|------------------------|
|                     | MSE ↓                  | PCC ↑                  | SCC ↑                  | MSE ↓                  | PCC ↑                  | SCC ↑                  | MSE ↓                  | PCC ↑                  | SCC ↑                  |
| IGI-DL              | 1.3441 ± 0.1693        | 0.0899 ± 0.0871        | 0.0901 ± 0.0908        | 1.4990 ± 0.1542        | 0.1280 ± 0.0629        | 0.1147 ± 0.0543        | 1.6567 ± 0.2289        | 0.1287 ± 0.0347        | 0.1061 ± 0.0321        |
| iStar               | 0.3977 ± 0.0836        | 0.2731 ± 0.0221        | 0.2013 ± 0.0304        | 0.9479 ± 0.3782        | 0.4849 ± 0.0347        | 0.3700 ± 0.0176        | 0.6946 ± 0.0807        | 0.1602 ± 0.0145        | 0.1521 ± 0.0135        |
| TRIPLEX             | 0.1999 ± 0.0272        | 0.2577 ± 0.0222        | 0.2393 ± 0.0252        | 0.3256 ± 0.0809        | 0.3141 ± 0.0243        | 0.2626 ± 0.0166        | 0.9548 ± 0.1671        | 0.1096 ± 0.0225        | 0.1063 ± 0.0188        |
| <b>STeVs (Ours)</b> | <b>0.1619 ± 0.0092</b> | <b>0.3640 ± 0.0333</b> | <b>0.2939 ± 0.0260</b> | <b>0.2719 ± 0.0195</b> | <b>0.5443 ± 0.0338</b> | <b>0.4039 ± 0.0237</b> | <b>0.5699 ± 0.0553</b> | <b>0.2087 ± 0.0132</b> | <b>0.2136 ± 0.0110</b> |

1876  
1877  
1878  
1879

1880 settings, STeVs consistently outperforms all baseline methods across the HBC, HSC, and MISAR  
1881 datasets, achieving the lowest MSE and the highest PCC and SCC correlations.  
1882

## 1883 K ADDITIONAL EXPERIMENTAL DETAILS

### 1884 K.1 RUNNING TIME

1885  
1886 We evaluated the computational efficiency of STeVs against all baseline models. As detailed in the  
1887 training time tables in the Appendix, STeVs demonstrates excellent computational performance. In  
1888 both intra-slice and cross-slice settings, the training time for STeVs is significantly lower than that  
1889

of other high-performance Transformer-based models, such as iStar and M2ORT, and is one to two orders of magnitude faster than STAGE. This indicates that STeVs maintains low computational overhead while achieving state-of-the-art predictive performance, showcasing an excellent balance between efficiency and accuracy.

## K.2 PARAMETER SETTINGS FOR OTHER METHODS

To ensure a fair comparison with baseline models and to facilitate the reproducibility of our results, we conducted a comprehensive hyperparameter search for all baselines. As detailed in the parameter search table in the Appendix, we defined a search space for the key hyperparameters of each model and determined the optimal parameter combination for each dataset independently. This targeted tuning strategy ensures that every baseline model was performing at or near its optimal state for comparison against STeVs, thereby validating the rigor of our experimental evaluation.

Table 19: Intra-slice Training Time(s). Our experiments were conducted on a high-performance server equipped with four NVIDIA A100 GPUs (80GB of VRAM each), dual Intel(R) Xeon(R) Gold 6267C CPUs, and 1.5TB of system memory. The runtimes reported in the table are for running the model on a single GPU.

| Dataset | ST-Net | BLEEP  | EGN    | IGI-DL | iStar   | TRIPLEX | M2ORT   | STAGE    | STeVs  |
|---------|--------|--------|--------|--------|---------|---------|---------|----------|--------|
| D151507 | 816.66 | 710.66 | 723.82 | 46.42  | 4263.32 | 329.58  | 3273.99 | 19840.76 | 315.07 |
| D151508 | 632.69 | 670.33 | 776.64 | 45.91  | 5057.34 | 311.76  | 3854.78 | 18280.31 | 349.79 |
| D151509 | 677.69 | 629.27 | 973.14 | 44.98  | 4784.25 | 368.39  | 3470.88 | 23201.72 | 354.20 |
| D151510 | 694.55 | 632.45 | 917.32 | 38.12  | 5266.73 | 328.05  | 3575.34 | 17053.08 | 332.63 |
| D151669 | 588.12 | 694.86 | 925.39 | 38.45  | 3457.32 | 269.61  | 3583.80 | 16024.78 | 288.73 |
| D151670 | 576.13 | 530.80 | 796.37 | 44.07  | 3211.23 | 249.29  | 3950.09 | 14621.26 | 238.13 |
| D151671 | 676.64 | 641.43 | 799.86 | 41.83  | 3415.35 | 298.14  | 3870.76 | 19408.45 | 272.04 |
| D151672 | 691.75 | 499.68 | 813.08 | 42.16  | 3454.13 | 280.87  | 3661.85 | 24743.11 | 277.08 |
| D151673 | 680.40 | 602.45 | 904.72 | 49.36  | 4236.42 | 283.91  | 3270.12 | 17625.90 | 268.60 |
| D151674 | 886.31 | 656.57 | 902.83 | 52.55  | 5283.45 | 279.64  | 3584.43 | 21101.03 | 258.41 |
| D151675 | 690.43 | 481.23 | 946.43 | 47.80  | 3436.56 | 421.84  | 3289.74 | 20454.75 | 246.32 |
| D151676 | 647.71 | 597.35 | 925.94 | 56.38  | 4203.35 | 274.28  | 3611.79 | 17363.65 | 302.48 |
| SA-1    | 639.54 | 514.74 | 878.00 | 53.71  | 4201.45 | 236.85  | 3467.52 | 19567.36 | 196.62 |
| SA-2    | 775.66 | 687.63 | 816.49 | 54.96  | 2376.21 | 249.96  | 3359.48 | 21511.63 | 198.71 |
| SP-1    | 851.26 | 444.32 | 961.98 | 56.53  | 3201.29 | 266.62  | 3690.96 | 24367.12 | 260.48 |
| SP-2    | 661.83 | 442.03 | 920.32 | 53.27  | 3815.53 | 266.39  | 3879.65 | 26614.65 | 272.23 |

Table 20: Cross-slice Training Time(s). Our experiments were conducted on a high-performance server equipped with four NVIDIA A100 GPUs (80GB of VRAM each), dual Intel(R) Xeon(R) Gold 6267C CPUs, and 1.5TB of system memory. The runtimes reported in the table are for running the model on a single GPU.

| Dataset | ST-Net  | BLEEP  | EGN     | IGI-DL | iStar   | TRIPLEX | M2ORT   | STAGE    | STeVs  |
|---------|---------|--------|---------|--------|---------|---------|---------|----------|--------|
| D151507 | 720.07  | 302.15 | 870.61  | 51.40  | 5813.85 | 715.52  | 4123.56 | 18426.30 | 413.85 |
| D151508 | 870.90  | 360.68 | 978.36  | 51.77  | 6344.25 | 672.18  | 4087.91 | 27341.57 | 494.83 |
| D151509 | 799.45  | 354.93 | 1385.73 | 46.03  | 6427.45 | 681.49  | 4210.34 | 21036.94 | 597.39 |
| D151510 | 862.53  | 403.01 | 1112.65 | 42.23  | 5132.24 | 795.83  | 3989.45 | 19508.30 | 508.69 |
| D151669 | 748.22  | 219.61 | 863.06  | 48.53  | 5383.45 | 655.76  | 4056.22 | 23193.66 | 598.03 |
| D151670 | 1024.44 | 282.19 | 857.38  | 57.46  | 6642.34 | 622.20  | 4188.76 | 21346.31 | 569.06 |
| D151671 | 792.82  | 313.80 | 968.52  | 57.28  | 5632.64 | 743.64  | 3998.11 | 22938.56 | 470.93 |
| D151672 | 981.05  | 310.15 | 928.61  | 56.01  | 4330.84 | 895.64  | 4065.99 | 17814.49 | 500.48 |
| D151673 | 899.40  | 309.10 | 1047.13 | 48.23  | 5245.45 | 839.44  | 4176.54 | 26316.95 | 425.79 |
| D151674 | 777.04  | 509.31 | 1126.61 | 47.37  | 5246.56 | 787.96  | 3954.88 | 24910.94 | 454.83 |
| D151675 | 841.35  | 406.07 | 1220.79 | 47.41  | 4256.57 | 786.02  | 4022.65 | 24798.90 | 556.87 |
| D151676 | 788.38  | 367.95 | 1095.60 | 48.63  | 6423.63 | 746.98  | 4101.99 | 28050.22 | 544.18 |
| SA-1    | 730.78  | 309.12 | 914.99  | 54.55  | 5356.29 | 472.68  | 4005.43 | 18317.55 | 454.80 |
| SA-2    | 915.74  | 359.40 | 1016.93 | 56.32  | 4356.43 | 493.94  | 3978.22 | 22109.28 | 284.63 |
| SP-1    | 901.73  | 371.56 | 1228.21 | 95.84  | 5485.25 | 651.50  | 4011.67 | 27389.33 | 518.49 |
| SP-2    | 935.85  | 338.43 | 1224.59 | 61.14  | 4352.24 | 653.60  | 4155.88 | 28165.83 | 527.08 |

Table 21: Baseline Parameter Search Results

| Model   | Hyperparameter | Search Range         | D151807 | D151808 | D151809 | D151810 | D151869 | D151670 | D151671 | D151672 | D151673 | D151674 | D151675 | D151676 | SA-1  | SA-2  | SP-1  | SP-2  |
|---------|----------------|----------------------|---------|---------|---------|---------|---------|---------|---------|---------|---------|---------|---------|---------|-------|-------|-------|-------|
| ST-Net  | learning_rate  | [1e-4, 5e-4, 1e-3]   | 5e-04   | 1e-03   | 5e-04   | 5e-04   | 1e-04   | 5e-04   | 5e-04   | 1e-03   | 5e-04   | 5e-04   | 5e-04   | 5e-04   | 1e-03 | 5e-04 | 1e-03 | 1e-03 |
|         | l2_reg         | [0.001, 0.005, 0.01] | 0.005   | 0.005   | 0.001   | 0.005   | 0.005   | 0.01    | 0.005   | 0.01    | 0.005   | 0.005   | 0.005   | 0.005   | 0.001 | 0.001 | 0.005 | 0.001 |
| BLEEP   | lr             | [1e-4, 5e-4, 1e-3]   | 1e-03   | 1e-03   | 1e-03   | 1e-03   | 1e-03   | 1e-03   | 1e-03   | 1e-03   | 1e-03   | 1e-03   | 1e-03   | 1e-03   | 1e-03 | 1e-03 | 1e-03 | 1e-03 |
|         | hidden_dim     | [128, 256, 512]      | 256     | 256     | 256     | 512     | 128     | 256     | 256     | 256     | 512     | 256     | 256     | 256     | 512   | 256   | 512   | 512   |
|         | lambda         | [0.5, 1, 2]          | 1       | 1       | 1       | 0.5     | 1       | 2       | 1       | 1       | 1       | 2       | 1       | 1       | 0.5   | 1     | 0.5   | 0.5   |
| EGN     | lr             | [1e-4, 5e-4, 1e-3]   | 5e-04   | 5e-04   | 5e-04   | 5e-04   | 5e-04   | 5e-04   | 5e-04   | 5e-04   | 5e-04   | 5e-04   | 5e-04   | 5e-04   | 1e-03 | 1e-03 | 1e-03 | 1e-03 |
|         | hidden_dim     | [64, 128, 256]       | 128     | 128     | 128     | 64      | 128     | 128     | 128     | 128     | 128     | 128     | 256     | 128     | 256   | 256   | 256   | 256   |
|         | num_layers     | [2, 3, 4]            | 3       | 2       | 3       | 3       | 4       | 3       | 3       | 3       | 3       | 2       | 3       | 3       | 4     | 3     | 4     | 4     |
|         | dropout        | [0.3, 0.5, 0.7]      | 0.5     | 0.5     | 0.5     | 0.5     | 0.3     | 0.5     | 0.7     | 0.5     | 0.5     | 0.5     | 0.5     | 0.5     | 0.3   | 0.5   | 0.3   | 0.3   |
|         | lam            | [0.1, 0.5, 1.0]      | 0.5     | 0.5     | 0.5     | 1.0     | 0.5     | 0.5     | 0.5     | 0.1     | 0.5     | 0.5     | 0.5     | 0.5     | 1     | 1     | 1     | 1     |
| IGI-DL  | lr             | [1e-4, 5e-4, 1e-3]   | 1e-04   | 1e-04   | 1e-04   | 1e-04   | 1e-04   | 1e-04   | 1e-04   | 1e-04   | 1e-04   | 1e-04   | 1e-04   | 1e-04   | 5e-04 | 5e-04 | 5e-04 | 5e-04 |
|         | gat_hidden_dim | [128, 256, 512]      | 256     | 256     | 256     | 256     | 256     | 256     | 256     | 256     | 256     | 256     | 256     | 256     | 128   | 128   | 128   | 128   |
|         | gat_layer_num  | [2, 3, 4]            | 4       | 4       | 4       | 4       | 3       | 3       | 3       | 3       | 3       | 3       | 3       | 3       | 2     | 2     | 2     | 2     |
|         | gat_dropout    | [0.1, 0.2, 0.3]      | 0.2     | 0.1     | 0.2     | 0.2     | 0.2     | 0.3     | 0.2     | 0.2     | 0.1     | 0.2     | 0.2     | 0.2     | 0.1   | 0.2   | 0.1   | 0.1   |
| iStar   | lr             | [1e-4, 5e-4, 1e-3]   | 5e-04   | 5e-04   | 1e-03   | 5e-04   | 5e-04   | 5e-04   | 5e-04   | 5e-04   | 5e-04   | 1e-04   | 5e-04   | 5e-04   | 1e-03 | 1e-03 | 1e-03 | 1e-03 |
|         | weight_decay   | [1e-5, 1e-4, 1e-3]   | 1e-04   | 1e-04   | 1e-04   | 1e-05   | 1e-04   | 1e-04   | 1e-04   | 1e-04   | 1e-03   | 1e-04   | 1e-04   | 1e-04   | 1e-05 | 1e-04 | 1e-05 | 1e-05 |
| TRIPLEX | learning_rate  | [1e-4, 5e-4, 1e-3]   | 1e-04   | 1e-04   | 1e-04   | 1e-04   | 1e-04   | 1e-04   | 1e-04   | 1e-04   | 5e-04   | 5e-04   | 5e-04   | 5e-04   | 1e-04 | 1e-04 | 1e-04 | 1e-04 |
|         | n_hidden       | [64, 128, 256]       | 128     | 128     | 128     | 128     | 128     | 128     | 128     | 128     | 128     | 128     | 128     | 128     | 128   | 128   | 128   | 128   |
|         | n_layers       | [2, 3, 4]            | 3       | 3       | 3       | 3       | 3       | 4       | 3       | 3       | 4       | 3       | 3       | 3       | 4     | 4     | 4     | 4     |
|         | dropout        | [0.1, 0.3, 0.5]      | 0.3     | 0.3     | 0.1     | 0.3     | 0.3     | 0.3     | 0.3     | 0.5     | 0.3     | 0.3     | 0.3     | 0.1     | 0.5   | 0.3   | 0.5   | 0.5   |
|         | weight_decay   | [1e-5, 1e-4, 1e-3]   | 1e-04   | 1e-04   | 1e-04   | 1e-04   | 1e-04   | 1e-04   | 1e-04   | 1e-04   | 1e-04   | 1e-04   | 1e-04   | 1e-04   | 1e-04 | 1e-04 | 1e-04 | 1e-04 |
|         | alpha          | [0.1, 0.5, 1.0]      | 0.5     | 0.5     | 0.5     | 0.5     | 0.5     | 0.5     | 0.5     | 0.5     | 0.5     | 0.5     | 0.5     | 0.5     | 1     | 1     | 1     | 1     |
| M2ORT   | lr             | [1e-4, 5e-4, 1e-3]   | 1e-04   | 1e-04   | 1e-04   | 1e-04   | 1e-04   | 1e-04   | 1e-04   | 1e-04   | 1e-04   | 1e-04   | 1e-04   | 1e-04   | 1e-04 | 1e-04 | 1e-04 | 1e-04 |
|         | weight_decay   | [1e-5, 1e-4, 1e-3]   | 1e-04   | 1e-04   | 1e-04   | 1e-04   | 1e-04   | 1e-04   | 1e-04   | 1e-04   | 1e-04   | 1e-04   | 1e-04   | 1e-04   | 1e-05 | 1e-05 | 1e-05 | 1e-05 |
| STAGE   | lr             | [0.01, 0.005, 0.001] | 0.005   | 0.005   | 0.005   | 0.005   | 0.005   | 0.005   | 0.005   | 0.005   | 0.005   | 0.005   | 0.005   | 0.005   | 0.001 | 0.001 | 0.001 | 0.001 |
|         | hidden_dims    | [512, 256, 128]      | 256     | 256     | 256     | 256     | 256     | 256     | 256     | 256     | 256     | 256     | 256     | 256     | 256   | 256   | 256   | 256   |
|         | lambda_recon   | [0.1, 1, 10]         | 1       | 10      | 1       | 1       | 1       | 1       | 10      | 1       | 1       | 1       | 1       | 1       | 10    | 1     | 10    | 10    |
|         | lambda_kl      | [0.1, 1, 10]         | 1       | 1       | 1       | 0.1     | 1       | 1       | 1       | 1       | 1       | 1       | 1       | 1       | 0.1   | 0.1   | 0.1   | 0.1   |
|         | lambda_graph   | [0.1, 1, 10]         | 1       | 1       | 0.1     | 1       | 1       | 1       | 1       | 1       | 1       | 1       | 1       | 1       | 0.1   | 0.1   | 0.1   | 0.1   |

## L THE USE OF LARGE LANGUAGE MODELS (LLMs)

During the preparation of this manuscript, we utilized Large Language Models (LLMs) as writing assistants. Specifically, we used Gemini Pro and DeepSeek to improve the grammar, clarity, and readability of the text. The models’ role was strictly limited to rephrasing sentences for better flow and correcting typographical errors. The core scientific ideas, experimental design, analysis, and conclusions presented in this paper were conceived and developed entirely by the human authors. We have carefully reviewed and edited all model-generated text and take full responsibility for the final content of this paper, ensuring its scientific accuracy and originality.
